# Supplementary material
Source: PubMed Central journal article supplement (PMC7547280)
Supplement: pnas.2009606117.sapp.pdf [file pnas.2009606117.sapp.pdf]

Supplementary Information for

## Circulating testican-2 is a podocyte-derived marker of kidney health

**Authors:** Debby Ngo<sup>1,2†</sup> (ORCID 0000-0003-2681-3475), Donghai Wen<sup>3,4†</sup> (ORCID 0000-0003-2707-036X), Yan Gao<sup>5</sup>, Michelle J. Keyes<sup>1</sup>, Erika R. Drury<sup>6</sup>, Dan H. Katz<sup>1</sup> (ORCID [0000-0001-7237-8502](https://orcid.org/0000-0001-7237-8502)), Mark D. Benson<sup>1</sup> (ORCID [0000-0001-8977-2389](https://orcid.org/0000-0001-8977-2389)), Sumita Sinha<sup>1</sup>, Dongxiao Shen<sup>1</sup>, Laurie A. Farrell<sup>1</sup>, Bennet D. Peterson<sup>1</sup>, David J. Friedman<sup>7</sup>, Sammy Elmariah<sup>8</sup> (ORCID 0000-0002-8013-8733), Bessie A. Young<sup>9,10</sup>, J. Gustav Smith<sup>11,12</sup> (ORCID 0000-0001-6285-9935), Qiong Yang<sup>13</sup> (ORCID 0000-0002-3658-1375), Ramachandran S. Vasani<sup>14,15</sup> (ORCID 0000-0001-7357-5970), Martin G. Larson<sup>13,15</sup> (ORCID 0000-0002-9631-1254), Adolfo Correa<sup>5</sup>, Benjamin D. Humphreys<sup>16</sup> (ORCID 0000-0002-6420-8703), Thomas J Wang<sup>17</sup> (ORCID 0000-0003-4063-6508), Martin R. Pollak<sup>7\*</sup>, James G. Wilson<sup>1</sup>, Robert E. Gerszten<sup>1</sup> (ORCID 0000-0002-6767-7687), Eugene P. Rhee<sup>3,4\*</sup> (ORCID 0000-0002-4804-7583)

### Affiliations:

<sup>1</sup>Division of Cardiovascular Medicine, Beth Israel Deaconess Medical Center, Boston, MA, USA.

<sup>2</sup>Division of Pulmonary, Critical Care and Sleep Medicine, Beth Israel Deaconess Medical Center, Boston, MA, USA.

<sup>3</sup>Nephrology Division, Massachusetts General Hospital, Boston, MA, USA.

<sup>4</sup>Endocrine Unit, Massachusetts General Hospital, Boston, MA, USA.

<sup>5</sup>Jackson Heart Study, Department of Medicine, University of Mississippi, Jackson, MS, USA.

<sup>6</sup>Division of Nephrology, University of Rochester School of Medicine, Rochester, NY, USA.

<sup>7</sup>Division of Nephrology, Beth Israel Deaconess Medical Center, Boston, MA, USA.

<sup>8</sup>Cardiology Division, Massachusetts General Hospital, Boston, MA, USA.

<sup>9</sup>Kidney Research Institute, University of Washington, Seattle, WA, USA.

<sup>10</sup>Division of Nephrology, Veteran Affairs Puget Sound Healthcare, Seattle, WA, USA.

<sup>11</sup>Department of Cardiology, Clinical Sciences, Lund University and Skåne University Hospital, Lund, Sweden.

<sup>12</sup>Department of Cardiology and Wallenberg Laboratory, Gothenburg University and Sahlgrenska University Hospital, Gothenburg, Sweden.

<sup>13</sup>Department of Biostatistics, Boston University School of Public Health, Boston, MA, USA.

<sup>14</sup>Department of Medicine, Divisions of Preventive Medicine and Cardiology, Boston University School of Medicine, MA, USA.

<sup>15</sup>The National Heart, Lung, and Blood Institute's Framingham Heart Study, Framingham, MA, USA.

<sup>16</sup>Division of Nephrology, Washington University of St. Louis School of Medicine, St. Louis, MO, USA.

<sup>17</sup>Department of Internal Medicine, University of Texas Southwestern Medical Center, Dallas, TX, USA.

†equal contribution

\*To whom correspondence should be addressed:

Eugene P. Rhee: (mailing address) Thier Research Building 1051, 50 Blossom Street, Boston MA 02114; (P) 617-643-2888; (email) [eprhee@partners.org](mailto:eprhee@partners.org)

or

Martin R. Pollak: (mailing address) 99 Brookline Ave, Boston MA 02215; (P) 617-667-0461; (email) [mpollak@bidmc.harvard.edu](mailto:mpollak@bidmc.harvard.edu)

**This PDF file includes:**

Supplementary Materials and Methods  
Figure S1  
Tables S1 to S6  
SI References

**Supplementary Materials and Methods****Genome-Wide Association Analysis in JHS**

Whole genome sequencing (WGS) in JHS has been described previously (1). Briefly, JHS participants underwent >30× WGS through the Trans-Omics for Precision Medicine (TOPMed) project at the Northwest Genome Center at University of Washington. The sequencing reads were transferred to the TOPMed Informatics Research Center (IRC), where they were aligned to build GRCh38 and joint genotype calling was performed on all TOPMed samples in the October 2018 release. Quality control was performed by the Sequencing Centers, the IRC, and the TOPMed Data Coordinating Center (DCC) prior to release to dbGAP. All variants with MAF >0.1% were included.

Due to skewed distribution, testican-2 aptamer levels were log-transformed and scaled by batch to a mean of 0 and standard deviation of 1. These transformed values were then adjusted for batch and plate, and the resulting residuals were inverse-normalized to ensure normality. Using EPACTS 3.4.1 on the Encore TOPMed Cloud Analysis Server (access date: 11/13/19), the associations between genetic variants and protein levels were tested using the Scalable and Accurate Implementation of Generalized mixed models (SAIGE) pipeline to account for relatedness and adjusted for age and sex, as well the first 10 principal components to account for population admixture. 1,905 individuals had both whole genome sequencing data and proteomic profiling (2).

**Genome-Wide Association Analysis in FHS**

Genotyping was conducted using the Affymetrix 500K mapping array and the Affymetrix 50K gene-focused molecular inversion probes supplemental array as previously described (3). Genotypes were called using Chiamo (<http://www.stats.ok.ac.uk/~marchini/software/gwas/chiamo.html>). The 1000 Genomes Phase I version 3 (August 2012) reference panel was used to perform imputation using a hidden Markov model implemented in MACH (version 1.0.16) (4) for all single-nucleotide polymorphisms

(SNPs) passing the following criteria: call rate  $\geq 97\%$ ,  $P$  for the Hardy-Weinberg test statistic (pHWE)  $\geq 1 \times 10^{-6}$ , Mishap  $P \geq 1 \times 10^{-9}$ , Mendel errors  $\leq 100$ , and minor allele frequency (MAF)  $\geq 1\%$ .

Because of skewed distributions of most protein levels, genetic association analyses were conducted using batch specific rank normal transformed residual values of protein levels adjusting for plate numbers. The association of genetic variants and protein levels was tested using linear mixed-effects models to accommodate pedigree structure in FHS under an additive genetic model, adjusted for age, sex and first 10 principal components for population admixture (5). GWAS analyses were performed using the R GWAF package (6). Separate analyses were performed for samples in each batch and then the results were meta-analyzed using the inverse variance weighted method for each cohort. The cohort specific results were then combined using inverse variance weighted meta-analyses.

### **Comparison of JHS and FHS GWAS**

GWAS in JHS was run using build GRCh38 of the human genome and FHS was run using build GRCh37. In order to compare results between cohorts, genomic positions for each RefSNP ID from FHS were annotated in Build 38 using package biomaRt (R, Vienna, Austria) to access the Ensembl database (access date 11/13/19) limited to variants within a 1MB region around *SPOCK2*. Results were then merged by Build 38 genomic location. RefSNP IDs for GWAS results from JHS were also obtained from Ensembl using their genomic locations (RefSNP IDs are not provided for routine download by Encore). RefSNP IDs were used to query dbSNP (access date 11/24/19) for minor allele frequencies in both the African and European (Finnish and non-Finnish) subgroups of the genome Aggregation Database (gnomAD) v2.1.1 (7). If data from gnomAD was not available, 1000Genomes was used. Variants associated at  $P > 0.001$  with Testican-2 levels in either cohort were excluded for efficiency. Similarly, variants were excluded from graphical representation if a RefSNP ID could not be identified in Ensembl or no frequency data was available in dbSNP, though these variants are included in Table S5.

### **Cell culture experiments**

For each individual experiment, basal medium containing L-glutamine (10 nM), heparin (0.75 unit/mL), ascorbic acid (50  $\mu\text{g/mL}$ ) and hydrocortisone hemisuccinate (1  $\mu\text{g/mL}$ ) was used.

In vitro angiogenesis was examined using the Angiogenesis Assay kit (ECM625, EMD Millipore) under the manufacturer's protocol. Briefly, HGECs were serum and growth factor starved for 2 hours

before seeding onto a 96-well plate coated with ECMatrix™ gel with a confluence of about 10,000 cells per well. Vehicle (PBS), human testican-2 (R&D Systems, Catalog #2328-PI) at different concentrations, and/or human VEGF (R&D Systems, Catalog #293-VE) were added into the basal medium and incubated for 8 hours. Cells were examined with 10X magnification and images were taken for tube formation analysis.

HGEC migration was examined using the Corning BioCoat Matrigel Invasion Chambers (Catalog # 354480, Bedford, MA) under the manufacturer's protocol. Briefly, basal medium was placed into the interior of the inserts and bottom of the wells and cultured for 2 hours. HGECs in basal medium were seeded into the interior of the inserts at 50,000 cells/well. Basal medium with vehicle (PBS), testican-2 (10 ng/mL), and/or VEGF (50 ng/mL) were added into the bottom of the wells and cells were incubated for an additional 22 hours. After incubation, the non-invading cells are removed from the upper surface of the membrane by scrubbing with a cotton swab. The invading cells on the lower surface of the membrane were fixed and stained with 0.1% crystal violet in 10% ethanol at room temperature for 30 minutes. Inserts were then washed with water and membranes were examined with 10X magnification and images were taken for analysis.

MMP-2/MMP-9 activity in the cultured media of HGECs were examined using the Fluorogenic InnoZyme™ Gelatinase (MMP-2/MMP-9) Activity Assay kit (CBA003, EMD Millipore) under the manufacturer's instruction. Briefly, HGECs were serum and growth factor starved for 2 hours and then treated with vehicle (PBS) or testican-2 (10 ng/mL) in basal medium for 24 hours. Culture supernatant were then collected and MMP-2/MMP-9 activity was examined using a fluorescence reader in a 96-well plate with a filter set at an excitation wavelength of 320 nm and an emission wavelength of 405 nm.

HGEC proliferation/viability was examined using the Resazurin Cell Viability kit (PK-CA707-30025, PromoCell, Heidelberg, Germany) under the manufacturer's instructions. Briefly, HGECs were serum and growth factor starved for 2 hours before seeding at 10,000 cells/well in a 96-well plate. Vehicle (PBS), testican-2 (10 ng/mL), and/or VEGF (50 ng/mL) were added into the basal medium and incubated for 72 hours. At the end of incubation, 10 µl resazurin solution was added to each well and incubated for an additional 2 hours. Colorimetric absorbance at 570 nm and 600 nm was measured using a microplate reader.

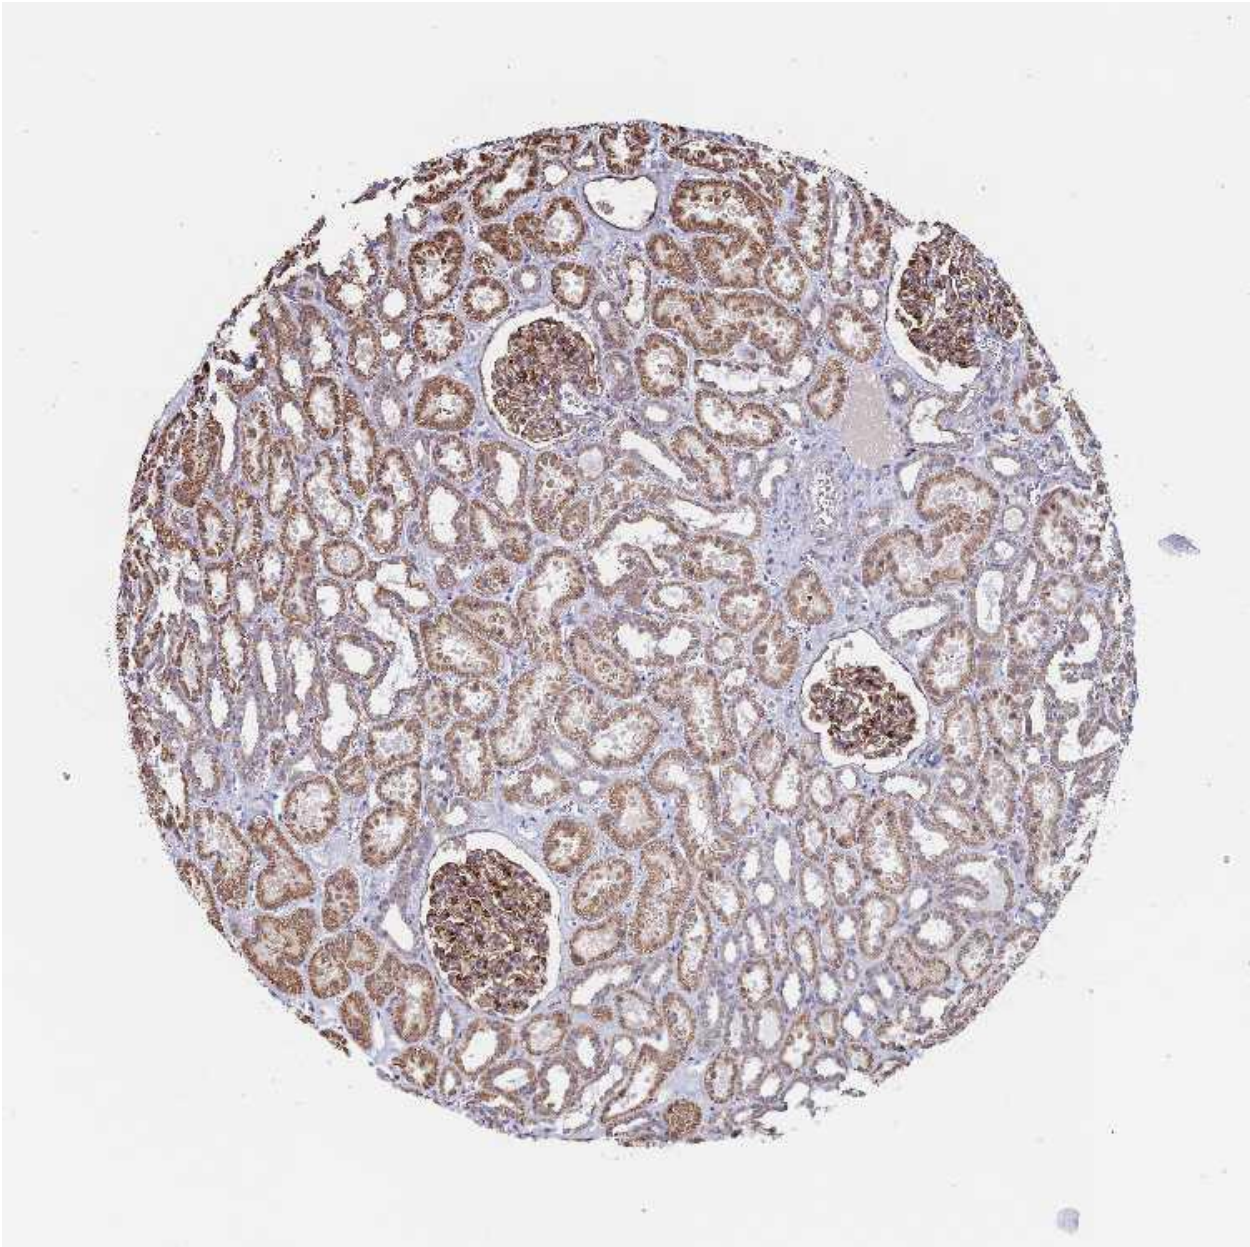

**Fig. S1. Kidney immunohistochemistry for testican-2 from the Human Protein Atlas.** (<https://www.proteinatlas.org/ENSG00000107742-SPOCK2/tissue/kidney#img>). Image is from normal kidney tissue from a 41 year old female (polyclonal antibody HPA044605).

**Table S1.** Median renal V/A ratios for all proteins

| <b>Protein</b>           | <b>median V/A ratio</b> | <b>P</b> |
|--------------------------|-------------------------|----------|
| MIP-5                    | 0.89                    | 3.2E-11  |
| PTH                      | 0.68                    | 2.8E-10  |
| Testican-2               | 1.40                    | 1.5E-09  |
| ARMEL                    | 0.88                    | 1.8E-09  |
| TFF3                     | 0.88                    | 1.0E-08  |
| FGF-20                   | 1.58                    | 1.3E-08  |
| Cystatin C               | 0.87                    | 1.4E-08  |
| TAJ                      | 0.87                    | 2.3E-08  |
| FGF9                     | 1.23                    | 2.8E-08  |
| MPIF-1                   | 0.90                    | 3.7E-08  |
| Elafin                   | 0.89                    | 4.4E-08  |
| FABP                     | 0.88                    | 4.7E-08  |
| Cystatin M               | 0.86                    | 9.7E-08  |
| Ephrin-A2                | 0.94                    | 2.0E-07  |
| MIA                      | 0.94                    | 3.0E-07  |
| IGFBP-7                  | 1.14                    | 4.3E-07  |
| SECTM1                   | 0.91                    | 5.4E-07  |
| CD23                     | 0.93                    | 6.2E-07  |
| FAM3B                    | 0.91                    | 8.4E-07  |
| Trypsin                  | 0.92                    | 1.6E-06  |
| Beta2-Microglobulin      | 0.87                    | 1.6E-06  |
| DAN                      | 0.81                    | 3.3E-06  |
| PYY                      | 0.88                    | 4.7E-06  |
| MIC-1                    | 0.95                    | 4.8E-06  |
| CD59                     | 0.92                    | 5.4E-06  |
| REG4                     | 0.93                    | 5.7E-06  |
| IGFBP-6                  | 0.93                    | 5.7E-06  |
| RSPO4                    | 0.92                    | 6.9E-06  |
| Trypsin 2                | 0.91                    | 7.7E-06  |
| HCC-1                    | 0.93                    | 8.0E-06  |
| GAS1                     | 0.94                    | 1.2E-05  |
| ANP                      | 0.55                    | 1.2E-05  |
| Trefoil factor 2         | 0.89                    | 1.6E-05  |
| FAM3D                    | 0.90                    | 1.8E-05  |
| Corticotropin-lipotropin | 0.89                    | 2.6E-05  |
| uPA                      | 1.12                    | 2.8E-05  |
| kallikrein 8             | 0.89                    | 3.4E-05  |
| Cathepsin V              | 1.18                    | 3.5E-05  |
| BNP-32                   | 0.93                    | 3.9E-05  |
| FABPL                    | 0.82                    | 4.7E-05  |
| TNF sR-I                 | 0.94                    | 5.9E-05  |
| NRG4                     | 0.95                    | 6.2E-05  |
| JAM-B                    | 0.92                    | 7.0E-05  |
| IGFBP-1                  | 0.94                    | 1.1E-04  |
| HCC-4                    | 0.94                    | 1.2E-04  |
| tPA                      | 1.10                    | 1.5E-04  |
| Cathepsin S              | 0.95                    | 1.7E-04  |
| sRAGE                    | 0.92                    | 1.8E-04  |
| N-terminal pro-BNP       | 0.88                    | 1.9E-04  |
| PH                       | 0.87                    | 2.0E-04  |
| resistin                 | 0.96                    | 2.1E-04  |
| granzyme A               | 0.95                    | 2.4E-04  |

|                          |      |         |
|--------------------------|------|---------|
| Nectin-like protein 1    | 0.92 | 3.0E-04 |
| TFF1                     | 0.91 | 3.0E-04 |
| VEGF                     | 1.20 | 3.7E-04 |
| Ephrin-A4                | 0.92 | 4.6E-04 |
| CYTT                     | 0.89 | 5.9E-04 |
| Lipocalin 2              | 0.93 | 5.9E-04 |
| Glucagon                 | 0.89 | 6.0E-04 |
| LAG-1                    | 0.92 | 6.6E-04 |
| PARC                     | 0.96 | 6.8E-04 |
| CYTN                     | 0.89 | 6.9E-04 |
| FGF-19                   | 0.91 | 7.5E-04 |
| IGFBP-4                  | 0.92 | 8.3E-04 |
| Angiogenin               | 0.94 | 9.5E-04 |
| EFNB1                    | 0.96 | 9.8E-04 |
| PTHrP                    | 0.92 | 1.0E-03 |
| Myoglobin                | 0.90 | 1.0E-03 |
| Troponin T               | 0.94 | 1.1E-03 |
| Leptin                   | 0.94 | 1.2E-03 |
| RELT                     | 0.93 | 1.4E-03 |
| b-ECGF                   | 0.92 | 1.4E-03 |
| IL-23                    | 0.94 | 1.4E-03 |
| Dynactin subunit 2       | 0.95 | 1.5E-03 |
| ADAMTS-5                 | 0.97 | 1.5E-03 |
| ACTH                     | 0.96 | 1.8E-03 |
| Ck-b-8-1                 | 0.92 | 1.9E-03 |
| PDXK                     | 0.91 | 2.2E-03 |
| Kallikrein 7             | 0.93 | 2.6E-03 |
| SLAF6                    | 0.96 | 3.0E-03 |
| BSSP4                    | 0.96 | 3.1E-03 |
| Ephrin-A5                | 0.90 | 3.2E-03 |
| Fibrinogen g-chain dimer | 1.04 | 3.2E-03 |
| Kallikrein 11            | 0.92 | 3.7E-03 |
| PSP                      | 0.86 | 3.7E-03 |
| C5a                      | 0.93 | 3.9E-03 |
| FN1.4                    | 1.09 | 3.9E-03 |
| PIANP                    | 0.87 | 4.0E-03 |
| SARP-2                   | 1.34 | 4.2E-03 |
| Ephrin-A3                | 0.96 | 4.9E-03 |
| TSP4                     | 0.94 | 5.2E-03 |
| TRAIL R4                 | 0.97 | 5.6E-03 |
| Glypican 3               | 1.04 | 5.7E-03 |
| PTN                      | 1.37 | 6.0E-03 |
| SLPI                     | 0.96 | 6.0E-03 |
| GITR                     | 0.93 | 6.2E-03 |
| RGMB                     | 0.97 | 6.7E-03 |
| FN1.3                    | 1.08 | 6.9E-03 |
| Factor D                 | 0.94 | 6.9E-03 |
| FCN1                     | 0.95 | 7.1E-03 |
| MMP-2                    | 1.04 | 7.5E-03 |
| NKp30                    | 0.98 | 8.0E-03 |
| IL-20 Ra                 | 0.97 | 8.1E-03 |
| IL-5                     | 0.98 | 8.5E-03 |
| LCMT1                    | 1.03 | 8.6E-03 |
| IGFBP-2                  | 0.91 | 9.0E-03 |
| Fibrinogen               | 1.04 | 9.3E-03 |
| PPAC                     | 1.21 | 9.3E-03 |
| TPSB2                    | 0.96 | 9.6E-03 |

|                         |      |         |
|-------------------------|------|---------|
| Galectin-2              | 0.95 | 9.8E-03 |
| LBP                     | 1.03 | 9.8E-03 |
| TIG2                    | 0.91 | 1.0E-02 |
| D-dimer                 | 1.03 | 1.0E-02 |
| vWF                     | 1.12 | 1.1E-02 |
| FCRL3                   | 0.97 | 1.1E-02 |
| RAC3                    | 1.14 | 1.1E-02 |
| Layilin                 | 0.94 | 1.1E-02 |
| GFAP                    | 0.97 | 1.2E-02 |
| Fibronectin             | 1.14 | 1.2E-02 |
| Dtk                     | 0.95 | 1.3E-02 |
| sLRP1                   | 0.95 | 1.3E-02 |
| INGR2                   | 0.97 | 1.3E-02 |
| XEDAR                   | 0.95 | 1.3E-02 |
| HSP70 protein 8         | 1.03 | 1.3E-02 |
| RGM-C                   | 0.97 | 1.3E-02 |
| HSP 40                  | 1.16 | 1.4E-02 |
| FSTL3                   | 0.94 | 1.4E-02 |
| ASGR1                   | 0.91 | 1.4E-02 |
| aldolase A              | 1.07 | 1.6E-02 |
| Thrombopoietin Receptor | 0.99 | 1.6E-02 |
| PKC-G                   | 0.98 | 1.6E-02 |
| STRATIFIN               | 0.97 | 1.6E-02 |
| IL-17B                  | 1.09 | 1.7E-02 |
| TNFSF15                 | 0.92 | 1.7E-02 |
| NEUREGULIN-1            | 0.97 | 1.7E-02 |
| DBNL                    | 1.07 | 1.8E-02 |
| RAP                     | 1.03 | 1.8E-02 |
| GIB                     | 0.94 | 1.8E-02 |
| Myostatin               | 1.04 | 1.8E-02 |
| Renin                   | 1.04 | 1.9E-02 |
| PACAP-27                | 0.97 | 2.0E-02 |
| EphA1                   | 0.94 | 2.0E-02 |
| BGH3                    | 1.04 | 2.0E-02 |
| NET4                    | 1.05 | 2.0E-02 |
| TNR4                    | 0.97 | 2.0E-02 |
| CKAP2                   | 1.04 | 2.2E-02 |
| IL-17E                  | 0.97 | 2.2E-02 |
| C9                      | 1.02 | 2.2E-02 |
| IL-10 Rb                | 0.97 | 2.2E-02 |
| DSC2                    | 0.86 | 2.3E-02 |
| PUR8                    | 1.17 | 2.4E-02 |
| PBEF                    | 0.91 | 2.4E-02 |
| SGTA                    | 1.30 | 2.4E-02 |
| 4-1BB                   | 0.96 | 2.4E-02 |
| Calpain I               | 1.11 | 2.5E-02 |
| EphA5                   | 0.95 | 2.6E-02 |
| CRP                     | 1.05 | 2.6E-02 |
| SLAF5                   | 0.97 | 2.6E-02 |
| a-Synuclein             | 1.42 | 2.6E-02 |
| SOST                    | 0.98 | 2.7E-02 |
| ESAM                    | 0.97 | 2.7E-02 |
| Transferrin             | 1.04 | 2.8E-02 |
| CDC37                   | 1.05 | 2.9E-02 |
| SREC-I                  | 0.98 | 2.9E-02 |
| GDF-11                  | 1.02 | 3.0E-02 |
| annexin VI              | 0.77 | 3.1E-02 |



|                           |      |         |
|---------------------------|------|---------|
| AMPM2                     | 1.11 | 3.1E-02 |
| IP-10                     | 0.98 | 3.1E-02 |
| PPIE                      | 1.09 | 3.1E-02 |
| MSP                       | 0.97 | 3.1E-02 |
| BMP-6                     | 1.04 | 3.2E-02 |
| CATZ                      | 0.97 | 3.2E-02 |
| CAMK2A                    | 1.03 | 3.2E-02 |
| CD38                      | 0.98 | 3.2E-02 |
| PSA                       | 0.98 | 3.3E-02 |
| GDF-11/8                  | 1.02 | 3.4E-02 |
| Haptoglobin, Mixed Type   | 1.02 | 3.4E-02 |
| ENA-78                    | 0.98 | 3.4E-02 |
| ghrelin                   | 0.96 | 3.4E-02 |
| MK08                      | 1.07 | 3.6E-02 |
| Flt-3                     | 1.04 | 3.6E-02 |
| HIF-1a                    | 0.97 | 3.6E-02 |
| AIF1                      | 0.97 | 3.6E-02 |
| C34 gp41 HIV Fragment     | 0.95 | 3.7E-02 |
| SH21A                     | 0.96 | 3.7E-02 |
| Troponin I                | 0.96 | 3.8E-02 |
| TIMP-3                    | 1.15 | 3.8E-02 |
| cGMP-stimulated PDE       | 1.02 | 3.9E-02 |
| GAPDH, liver              | 1.21 | 3.9E-02 |
| NDP kinase B              | 1.24 | 3.9E-02 |
| H2B2E                     | 1.17 | 4.0E-02 |
| CLC4K                     | 0.99 | 4.1E-02 |
| MMP-7                     | 1.04 | 4.1E-02 |
| Cathepsin B               | 0.97 | 4.2E-02 |
| ADAM 9                    | 0.97 | 4.2E-02 |
| NLGX                      | 0.97 | 4.3E-02 |
| NovH                      | 1.17 | 4.3E-02 |
| CD63                      | 1.03 | 4.6E-02 |
| Lymphotoxin a1/b2         | 0.97 | 4.6E-02 |
| Sphingosine kinase 1      | 1.25 | 4.6E-02 |
| NUDC3                     | 0.96 | 4.6E-02 |
| EMR2                      | 0.98 | 4.7E-02 |
| Sonic Hedgehog            | 1.04 | 4.7E-02 |
| Factor I                  | 1.02 | 4.8E-02 |
| RAC1                      | 1.25 | 4.8E-02 |
| PCNA                      | 0.99 | 4.8E-02 |
| GSK-3 alpha/beta          | 1.19 | 4.8E-02 |
| RASA1                     | 1.01 | 4.9E-02 |
| IMDH2                     | 1.08 | 4.9E-02 |
| Gastrin-releasing peptide | 0.99 | 4.9E-02 |
| CPNE1                     | 1.27 | 4.9E-02 |
| SHP-2                     | 1.07 | 4.9E-02 |
| COLEC12                   | 1.00 | 5.0E-02 |
| TIMP-1                    | 0.94 | 5.0E-02 |
| GM-CSF                    | 0.97 | 5.1E-02 |
| IL-9                      | 0.98 | 5.1E-02 |
| clAP-2                    | 1.00 | 5.2E-02 |
| eIF-5                     | 1.07 | 5.3E-02 |
| FGF-8B                    | 1.04 | 5.3E-02 |
| 14-3-3 protein zeta/delta | 1.17 | 5.4E-02 |
| CLF-1/CLC Complex         | 0.99 | 5.5E-02 |
| H31                       | 1.22 | 5.5E-02 |
| PDPK1                     | 1.14 | 5.5E-02 |

|                        |      |         |
|------------------------|------|---------|
| EG-VEGF                | 0.98 | 5.6E-02 |
| NPS-PLA2               | 0.96 | 5.6E-02 |
| CNTN2                  | 0.98 | 5.7E-02 |
| Transgelin-2           | 1.01 | 5.7E-02 |
| LYNB                   | 1.33 | 5.7E-02 |
| FABPE                  | 0.97 | 5.7E-02 |
| TNF-a                  | 0.99 | 5.7E-02 |
| Carbonic anhydrase III | 0.93 | 5.8E-02 |
| NSE                    | 1.03 | 5.8E-02 |
| CXCL16, soluble        | 0.98 | 5.8E-02 |
| Siglec-3               | 0.97 | 6.0E-02 |
| ECM1                   | 1.02 | 6.0E-02 |
| AN32B                  | 0.98 | 6.0E-02 |
| BAD                    | 1.16 | 6.2E-02 |
| BCL6                   | 0.98 | 6.2E-02 |
| S100A7                 | 0.96 | 6.2E-02 |
| HSP 90b                | 1.06 | 6.3E-02 |
| CTLA-4                 | 0.99 | 6.4E-02 |
| MCP-2                  | 0.98 | 6.4E-02 |
| ART                    | 1.04 | 6.5E-02 |
| LEAP-1                 | 0.93 | 6.6E-02 |
| FGF-18                 | 1.13 | 6.6E-02 |
| AMPK a1b1g1            | 0.99 | 6.6E-02 |
| IFN-g R1               | 0.97 | 6.6E-02 |
| c-Jun                  | 0.97 | 6.6E-02 |
| MAPK14                 | 1.05 | 6.7E-02 |
| SOD                    | 1.06 | 6.7E-02 |
| Chitotriosidase-1      | 0.99 | 6.7E-02 |
| 14-3-3                 | 1.06 | 6.8E-02 |
| iC3b                   | 1.06 | 6.8E-02 |
| PDE11                  | 1.03 | 6.8E-02 |
| PKC-B-II               | 1.24 | 6.8E-02 |
| LEG9                   | 0.98 | 6.9E-02 |
| SMAD2                  | 1.33 | 6.9E-02 |
| Endoglin               | 0.95 | 6.9E-02 |
| LYN                    | 1.17 | 7.0E-02 |
| Kininogen, HMW         | 0.97 | 7.0E-02 |
| SET                    | 1.05 | 7.0E-02 |
| DLL4                   | 1.00 | 7.1E-02 |
| MMP-12                 | 0.96 | 7.1E-02 |
| Nectin-like protein 2  | 0.98 | 7.1E-02 |
| PPase                  | 1.15 | 7.2E-02 |
| Epithelial cell kinase | 0.95 | 7.3E-02 |
| FGF-8A                 | 1.16 | 7.4E-02 |
| IFN10                  | 0.98 | 7.4E-02 |
| CaMKK alpha            | 1.05 | 7.4E-02 |
| DRR1                   | 0.99 | 7.4E-02 |
| PSA1                   | 1.05 | 7.4E-02 |
| Calcineurin            | 1.07 | 7.6E-02 |
| LIMP II                | 0.99 | 7.6E-02 |
| PRL                    | 0.91 | 7.7E-02 |
| PF-4                   | 0.73 | 7.8E-02 |
| CTACK                  | 0.98 | 7.8E-02 |
| COMMD7                 | 1.04 | 7.8E-02 |
| Tropomyosin 4          | 1.22 | 7.9E-02 |
| Bone proteoglycan II   | 1.04 | 7.9E-02 |
| SRCN1                  | 1.24 | 7.9E-02 |

|                                 |      |         |
|---------------------------------|------|---------|
| FAM107B                         | 0.96 | 7.9E-02 |
| PKC-A                           | 1.27 | 8.0E-02 |
| Lymphotactin                    | 0.98 | 8.0E-02 |
| PDGFRA                          | 0.96 | 8.1E-02 |
| PD-L2                           | 0.98 | 8.1E-02 |
| FUT5                            | 1.03 | 8.1E-02 |
| BTK                             | 1.18 | 8.2E-02 |
| NCC27                           | 1.07 | 8.2E-02 |
| Testican-1                      | 1.02 | 8.2E-02 |
| Aflatoxin B1 aldehyde reductase | 1.21 | 8.3E-02 |
| CgA                             | 0.97 | 8.3E-02 |
| C1r                             | 0.97 | 8.6E-02 |
| Clusterin                       | 0.97 | 8.6E-02 |
| IDE                             | 1.13 | 8.7E-02 |
| MCP-3                           | 0.96 | 8.8E-02 |
| CHIP                            | 1.05 | 8.8E-02 |
| MEK1                            | 1.01 | 8.8E-02 |
| Factor B                        | 1.01 | 8.9E-02 |
| Stress-induced-phosphoprotein 1 | 1.16 | 9.0E-02 |
| STAT1                           | 1.17 | 9.1E-02 |
| LRP1B                           | 1.02 | 9.1E-02 |
| TrATPase                        | 1.01 | 9.1E-02 |
| BCL2-like 1 protein             | 1.01 | 9.2E-02 |
| MP2K2                           | 0.98 | 9.2E-02 |
| IMB1                            | 1.09 | 9.3E-02 |
| 41                              | 1.30 | 9.3E-02 |
| CYTD                            | 0.92 | 9.4E-02 |
| Mn SOD                          | 1.01 | 9.4E-02 |
| B7-H1                           | 0.98 | 9.4E-02 |
| FER                             | 1.15 | 9.5E-02 |
| Activin RIB                     | 1.00 | 9.5E-02 |
| CK-BB                           | 0.98 | 9.6E-02 |
| MASP3                           | 0.99 | 9.6E-02 |
| MIS                             | 1.02 | 9.8E-02 |
| Secretin                        | 0.99 | 9.8E-02 |
| HSP 90a/b                       | 1.04 | 9.8E-02 |
| FYN                             | 1.05 | 9.8E-02 |
| Cyclin B1                       | 0.99 | 9.9E-02 |
| PAK6                            | 1.25 | 9.9E-02 |
| PFD5                            | 1.03 | 1.0E-01 |
| CSK                             | 1.14 | 1.0E-01 |
| 14-3-3 protein beta/alpha       | 1.06 | 1.0E-01 |
| IL-12 RB2                       | 1.01 | 1.0E-01 |
| SBDS                            | 1.20 | 1.0E-01 |
| PDE1A                           | 1.05 | 1.0E-01 |
| eIF-5A-1                        | 1.22 | 1.0E-01 |
| STAT6                           | 1.02 | 1.0E-01 |
| TF                              | 0.95 | 1.0E-01 |
| JNK2                            | 1.00 | 1.0E-01 |
| Laminin                         | 1.04 | 1.1E-01 |
| PSD7                            | 1.05 | 1.1E-01 |
| Caspase-2                       | 0.97 | 1.1E-01 |
| Cytochrome P450 3A4             | 1.04 | 1.1E-01 |
| HVEM                            | 0.99 | 1.1E-01 |
| SHC1                            | 1.06 | 1.1E-01 |
| VEGF121                         | 1.05 | 1.1E-01 |
| IL-17F                          | 0.98 | 1.1E-01 |

|                                          |      |         |
|------------------------------------------|------|---------|
| Protein disulfide isomerase A3           | 1.03 | 1.1E-01 |
| Semaphorin 3A                            | 1.00 | 1.1E-01 |
| PDE5A                                    | 1.15 | 1.1E-01 |
| KREM2                                    | 1.08 | 1.1E-01 |
| PDGF-CC                                  | 0.98 | 1.1E-01 |
| CFC1                                     | 0.97 | 1.1E-01 |
| STAT3                                    | 1.04 | 1.1E-01 |
| KIRR3                                    | 0.98 | 1.2E-01 |
| ATS1                                     | 1.04 | 1.2E-01 |
| PKC-Z                                    | 1.03 | 1.2E-01 |
| RPS6KA3                                  | 1.09 | 1.2E-01 |
| MBD4                                     | 1.02 | 1.2E-01 |
| Cyclophilin A                            | 1.05 | 1.2E-01 |
| CK2-A2:B                                 | 1.04 | 1.2E-01 |
| Somatostatin-28                          | 0.98 | 1.2E-01 |
| HIV-2 Rev                                | 0.98 | 1.2E-01 |
| AMPK a2b2g1                              | 1.08 | 1.2E-01 |
| HCE001796                                | 1.03 | 1.2E-01 |
| BARK1                                    | 1.09 | 1.2E-01 |
| Antithrombin III                         | 1.03 | 1.2E-01 |
| PKB a/b/g                                | 1.04 | 1.2E-01 |
| Aggrecan                                 | 0.95 | 1.2E-01 |
| Cyclophilin F                            | 1.15 | 1.2E-01 |
| RS7                                      | 1.03 | 1.2E-01 |
| SCGF-beta                                | 1.02 | 1.2E-01 |
| C1-Esterase Inhibitor                    | 0.99 | 1.2E-01 |
| Integrin aVb5                            | 1.02 | 1.2E-01 |
| Neurotrophin-3                           | 1.03 | 1.3E-01 |
| SPINT2                                   | 0.98 | 1.3E-01 |
| TS                                       | 0.97 | 1.3E-01 |
| LY9                                      | 0.97 | 1.3E-01 |
| SIRT2                                    | 1.02 | 1.3E-01 |
| M2-PK                                    | 1.08 | 1.3E-01 |
| CBPE                                     | 1.05 | 1.3E-01 |
| MAPK2                                    | 1.07 | 1.3E-01 |
| PPID                                     | 1.23 | 1.3E-01 |
| Sorting nexin 4                          | 1.08 | 1.3E-01 |
| transcription factor MLR1, isoform CRA_b | 0.99 | 1.3E-01 |
| HSP 60                                   | 1.06 | 1.3E-01 |
| KPCI                                     | 1.11 | 1.3E-01 |
| Tenascin                                 | 1.02 | 1.3E-01 |
| LG3BP                                    | 0.95 | 1.3E-01 |
| TRY3                                     | 0.98 | 1.3E-01 |
| IgE                                      | 1.01 | 1.3E-01 |
| IL-12 Rb1                                | 0.99 | 1.3E-01 |
| CRDL1                                    | 0.97 | 1.3E-01 |
| PKB beta                                 | 1.03 | 1.3E-01 |
| KPCT                                     | 1.05 | 1.3E-01 |
| CD244                                    | 0.97 | 1.3E-01 |
| ERK-1                                    | 1.08 | 1.3E-01 |
| Noggin                                   | 0.97 | 1.4E-01 |
| HCE000483                                | 0.94 | 1.4E-01 |
| ASM3A                                    | 1.05 | 1.4E-01 |
| TSLP                                     | 1.02 | 1.4E-01 |
| PDK1                                     | 0.99 | 1.4E-01 |
| Coagulation Factor IX                    | 0.99 | 1.4E-01 |
| CD70                                     | 1.00 | 1.4E-01 |

|                           |      |         |
|---------------------------|------|---------|
| LYPD3                     | 0.97 | 1.4E-01 |
| CD36 ANTIGEN              | 1.01 | 1.4E-01 |
| IF4G2                     | 1.11 | 1.4E-01 |
| CDK8/cyclin C             | 1.01 | 1.4E-01 |
| CD109                     | 0.96 | 1.4E-01 |
| Periostin                 | 1.06 | 1.5E-01 |
| ATS15                     | 0.99 | 1.5E-01 |
| BAFF Receptor             | 1.01 | 1.5E-01 |
| IL-11                     | 1.02 | 1.5E-01 |
| MEPE                      | 0.99 | 1.5E-01 |
| MDHC                      | 1.07 | 1.5E-01 |
| DEAD-box protein 19B      | 1.03 | 1.5E-01 |
| BTC                       | 1.00 | 1.5E-01 |
| phosphoglycerate kinase 1 | 1.04 | 1.5E-01 |
| IL-7 Ra                   | 1.02 | 1.5E-01 |
| DC-SIGNR                  | 1.03 | 1.5E-01 |
| Caspase-3                 | 1.21 | 1.5E-01 |
| METAP1                    | 1.04 | 1.5E-01 |
| NRP1                      | 1.02 | 1.5E-01 |
| BMP10                     | 0.93 | 1.5E-01 |
| PSME1                     | 1.06 | 1.5E-01 |
| HNRPQ                     | 1.00 | 1.5E-01 |
| calreticulin              | 0.99 | 1.6E-01 |
| Ku70                      | 0.95 | 1.6E-01 |
| SLAF7                     | 1.04 | 1.6E-01 |
| Artemin                   | 1.02 | 1.6E-01 |
| GP114                     | 1.01 | 1.6E-01 |
| NACA                      | 1.11 | 1.6E-01 |
| CNTF                      | 0.98 | 1.6E-01 |
| NANOG                     | 0.98 | 1.6E-01 |
| Neurotrophin-5            | 0.99 | 1.6E-01 |
| DUS3                      | 1.05 | 1.6E-01 |
| KEAP1                     | 1.01 | 1.6E-01 |
| DSC3                      | 0.99 | 1.6E-01 |
| IgG                       | 1.02 | 1.6E-01 |
| Cofilin-1                 | 1.00 | 1.6E-01 |
| UFC1                      | 1.04 | 1.6E-01 |
| GPDA                      | 0.99 | 1.7E-01 |
| Prothrombin               | 1.02 | 1.7E-01 |
| FGF-5                     | 1.03 | 1.7E-01 |
| Ficolin-3                 | 0.94 | 1.7E-01 |
| IFNA7                     | 0.98 | 1.7E-01 |
| TrkC                      | 0.97 | 1.7E-01 |
| Coagulation Factor VII    | 0.98 | 1.7E-01 |
| NMT1                      | 1.04 | 1.7E-01 |
| SNAA                      | 1.25 | 1.7E-01 |
| IL24                      | 0.99 | 1.8E-01 |
| TSH                       | 0.96 | 1.8E-01 |
| Apo L1                    | 1.01 | 1.8E-01 |
| PIAS4                     | 0.99 | 1.8E-01 |
| S100A4                    | 1.01 | 1.8E-01 |
| ATP synthase beta chain   | 1.05 | 1.8E-01 |
| Transketolase             | 1.15 | 1.8E-01 |
| NRX1B                     | 0.98 | 1.8E-01 |
| PSA2                      | 1.02 | 1.8E-01 |
| IDS                       | 0.95 | 1.8E-01 |
| PA2G4                     | 1.22 | 1.8E-01 |

|                                     |      |         |
|-------------------------------------|------|---------|
| SCGF-alpha                          | 1.02 | 1.9E-01 |
| HGH                                 | 0.99 | 1.9E-01 |
| Rab GDP dissociation inhibitor beta | 1.09 | 1.9E-01 |
| PolyUbiquitin K63                   | 0.99 | 1.9E-01 |
| IL-8                                | 1.02 | 1.9E-01 |
| IGFBP-5                             | 0.97 | 1.9E-01 |
| UFM1                                | 1.06 | 1.9E-01 |
| a1-Antichymotrypsin                 | 1.03 | 1.9E-01 |
| CTGF                                | 1.00 | 1.9E-01 |
| HCE004359                           | 1.01 | 1.9E-01 |
| IL-1a                               | 0.97 | 1.9E-01 |
| PGRP-S                              | 0.99 | 1.9E-01 |
| MP2K3                               | 1.09 | 1.9E-01 |
| IL-22                               | 0.97 | 1.9E-01 |
| TWEAKR                              | 0.95 | 1.9E-01 |
| b-Endorphin                         | 0.98 | 1.9E-01 |
| tau                                 | 1.00 | 2.0E-01 |
| MBL                                 | 1.01 | 2.0E-01 |
| c-Myc                               | 0.99 | 2.0E-01 |
| DERM                                | 0.99 | 2.0E-01 |
| MFGM                                | 0.95 | 2.0E-01 |
| PGP9.5                              | 1.02 | 2.0E-01 |
| NR1D1                               | 1.00 | 2.0E-01 |
| BMP-1                               | 1.02 | 2.0E-01 |
| LIGHT                               | 0.99 | 2.0E-01 |
| Mcl-1                               | 0.96 | 2.0E-01 |
| IFN-b                               | 0.98 | 2.0E-01 |
| ATS13                               | 1.01 | 2.0E-01 |
| PSME3                               | 1.00 | 2.0E-01 |
| HO-2                                | 1.01 | 2.0E-01 |
| Granulysin                          | 0.98 | 2.0E-01 |
| CSH                                 | 1.00 | 2.0E-01 |
| IL-1Ra                              | 0.96 | 2.1E-01 |
| SAA                                 | 0.99 | 2.1E-01 |
| IL-1 R4                             | 1.01 | 2.1E-01 |
| BASI                                | 1.04 | 2.1E-01 |
| STX1a                               | 0.99 | 2.1E-01 |
| DHH                                 | 1.07 | 2.1E-01 |
| CAMK1D                              | 0.98 | 2.1E-01 |
| GRB2 adapter protein                | 1.09 | 2.1E-01 |
| IL-12                               | 0.99 | 2.1E-01 |
| UCRP                                | 0.98 | 2.1E-01 |
| IFN-a/b R1                          | 0.96 | 2.1E-01 |
| BCMA                                | 0.99 | 2.1E-01 |
| carbonic anhydrase II               | 0.99 | 2.1E-01 |
| NKp46                               | 1.01 | 2.1E-01 |
| BST1                                | 1.00 | 2.1E-01 |
| YES                                 | 1.03 | 2.1E-01 |
| Lysozyme                            | 1.01 | 2.1E-01 |
| Factor H                            | 1.00 | 2.2E-01 |
| HDGR2                               | 1.00 | 2.2E-01 |
| FLRT2                               | 1.01 | 2.2E-01 |
| GDF-9                               | 1.02 | 2.2E-01 |
| HSP 27                              | 1.12 | 2.2E-01 |
| CO8A1                               | 0.98 | 2.2E-01 |
| Notch-3                             | 1.00 | 2.2E-01 |
| ALT                                 | 1.02 | 2.2E-01 |

|                                  |      |         |
|----------------------------------|------|---------|
| alpha-1-antichymotrypsin complex | 0.98 | 2.2E-01 |
| DLRB1                            | 1.06 | 2.2E-01 |
| Glutamate carboxypeptidase       | 1.00 | 2.3E-01 |
| Eotaxin                          | 1.00 | 2.3E-01 |
| SMAD3                            | 1.12 | 2.3E-01 |
| IL-17                            | 0.99 | 2.3E-01 |
| OX2G                             | 0.98 | 2.3E-01 |
| SREC-II                          | 1.00 | 2.3E-01 |
| Granzyme B                       | 0.99 | 2.3E-01 |
| Vitronectin                      | 1.01 | 2.3E-01 |
| TSLP R                           | 1.02 | 2.3E-01 |
| annexin II                       | 1.13 | 2.3E-01 |
| ILT-4                            | 1.02 | 2.4E-01 |
| RNase H1                         | 0.99 | 2.4E-01 |
| Chk2                             | 1.00 | 2.4E-01 |
| DRG-1                            | 1.26 | 2.4E-01 |
| ASAH2                            | 0.99 | 2.4E-01 |
| GFRa-3                           | 1.02 | 2.4E-01 |
| Aminoacylase-1                   | 1.02 | 2.4E-01 |
| Keratin 18                       | 0.97 | 2.4E-01 |
| Lectin, mannose-binding 2        | 1.00 | 2.4E-01 |
| Hat1                             | 1.07 | 2.4E-01 |
| CHST6                            | 1.02 | 2.4E-01 |
| IL-2                             | 1.02 | 2.4E-01 |
| 4EBP2                            | 0.99 | 2.4E-01 |
| Peroxiredoxin-5                  | 1.00 | 2.4E-01 |
| DSCAM                            | 1.01 | 2.4E-01 |
| Cystatin-S                       | 0.99 | 2.4E-01 |
| B7-2                             | 0.98 | 2.4E-01 |
| IL-5 Ra                          | 0.97 | 2.4E-01 |
| ETHE1                            | 0.99 | 2.4E-01 |
| IgA                              | 1.00 | 2.4E-01 |
| Flt3 ligand                      | 0.99 | 2.4E-01 |
| Angiopoietin-1                   | 0.99 | 2.5E-01 |
| CATC                             | 0.97 | 2.5E-01 |
| HGF                              | 1.07 | 2.5E-01 |
| CK-MB                            | 1.04 | 2.5E-01 |
| EphB6                            | 0.99 | 2.5E-01 |
| LD78-beta                        | 0.99 | 2.5E-01 |
| Albumin                          | 0.98 | 2.5E-01 |
| S100A6                           | 1.14 | 2.5E-01 |
| gpIbIIIa                         | 1.00 | 2.5E-01 |
| OAS1                             | 1.00 | 2.5E-01 |
| ADAMTS-4                         | 0.99 | 2.5E-01 |
| Carbonic anhydrase 6             | 0.99 | 2.5E-01 |
| MDC                              | 1.02 | 2.5E-01 |
| Bcl-2                            | 1.05 | 2.5E-01 |
| CONA1                            | 1.03 | 2.5E-01 |
| GPC5                             | 0.98 | 2.5E-01 |
| SKP1                             | 1.10 | 2.5E-01 |
| FTCD                             | 0.99 | 2.5E-01 |
| VAV                              | 1.12 | 2.5E-01 |
| kallikrein 13                    | 0.99 | 2.6E-01 |
| Fas ligand, soluble              | 0.97 | 2.6E-01 |
| MFRP                             | 1.00 | 2.6E-01 |
| B7                               | 0.99 | 2.6E-01 |
| Desmoglein-1                     | 0.98 | 2.6E-01 |

|                                 |      |         |
|---------------------------------|------|---------|
| Granzyme H                      | 1.00 | 2.6E-01 |
| Apo A-I                         | 0.98 | 2.6E-01 |
| ERAB                            | 1.05 | 2.6E-01 |
| FSTL1                           | 1.01 | 2.6E-01 |
| Histone H2A.z                   | 1.10 | 2.6E-01 |
| ADAM12                          | 1.00 | 2.6E-01 |
| TIMP-2                          | 0.97 | 2.6E-01 |
| ABL1                            | 0.99 | 2.6E-01 |
| ULBP-2                          | 0.99 | 2.6E-01 |
| UNC5H3                          | 0.99 | 2.6E-01 |
| IL-3 Ra                         | 1.08 | 2.6E-01 |
| BMP-7                           | 1.03 | 2.6E-01 |
| ERBB4                           | 0.99 | 2.7E-01 |
| PIK3CA/PIK3R1                   | 1.02 | 2.7E-01 |
| MMP-10                          | 0.93 | 2.7E-01 |
| Cathepsin G                     | 1.01 | 2.7E-01 |
| MIP-1a                          | 0.99 | 2.7E-01 |
| PEX5                            | 0.98 | 2.7E-01 |
| PRKACA                          | 1.05 | 2.7E-01 |
| Aurora kinase A                 | 0.99 | 2.7E-01 |
| BMPR1A                          | 0.98 | 2.7E-01 |
| GPC6                            | 1.02 | 2.7E-01 |
| a2-Antiplasmin                  | 0.99 | 2.7E-01 |
| IL-7                            | 0.99 | 2.7E-01 |
| GCKR                            | 1.01 | 2.7E-01 |
| Nucleoside diphosphate kinase A | 1.02 | 2.7E-01 |
| Persephin                       | 0.99 | 2.7E-01 |
| Triosephosphate isomerase       | 1.17 | 2.7E-01 |
| MK01                            | 1.19 | 2.7E-01 |
| Coagulation Factor IXab         | 0.99 | 2.7E-01 |
| AGR2                            | 0.99 | 2.7E-01 |
| RSPO3                           | 1.05 | 2.8E-01 |
| HPG-                            | 1.01 | 2.8E-01 |
| GOT1                            | 1.01 | 2.8E-01 |
| MRCKB                           | 1.02 | 2.8E-01 |
| ERP29                           | 1.01 | 2.8E-01 |
| GNPMB                           | 1.00 | 2.8E-01 |
| HDAC8                           | 1.00 | 2.8E-01 |
| RAN                             | 1.17 | 2.8E-01 |
| ALK-1                           | 1.00 | 2.8E-01 |
| C3b                             | 0.87 | 2.8E-01 |
| SEM5A                           | 0.99 | 2.8E-01 |
| Cripto                          | 0.97 | 2.8E-01 |
| HCG                             | 1.01 | 2.9E-01 |
| C6                              | 1.03 | 2.9E-01 |
| AIP                             | 1.11 | 2.9E-01 |
| HCE003300                       | 0.99 | 2.9E-01 |
| CSRP3                           | 0.95 | 2.9E-01 |
| K-ras                           | 0.99 | 2.9E-01 |
| GDF2                            | 1.01 | 2.9E-01 |
| prostatic binding protein       | 1.00 | 3.0E-01 |
| Cadherin-5                      | 1.00 | 3.0E-01 |
| Endocan                         | 0.98 | 3.0E-01 |
| EPO-R                           | 1.01 | 3.0E-01 |
| KI3S1                           | 1.00 | 3.0E-01 |
| SE6L2                           | 1.14 | 3.0E-01 |
| HCE000104                       | 1.00 | 3.0E-01 |



|                           |      |         |
|---------------------------|------|---------|
| NKp44                     | 0.98 | 3.0E-01 |
| Cytidylate kinase         | 1.08 | 3.0E-01 |
| HTRA2                     | 1.00 | 3.0E-01 |
| PDGF Rb                   | 0.98 | 3.0E-01 |
| RUXF                      | 1.00 | 3.0E-01 |
| Phosphoglycerate mutase 1 | 1.00 | 3.0E-01 |
| GPVI                      | 1.00 | 3.0E-01 |
| WNT7A                     | 0.99 | 3.0E-01 |
| Lumican                   | 1.00 | 3.0E-01 |
| Thrombospondin-1          | 0.81 | 3.0E-01 |
| ERBB2                     | 1.02 | 3.0E-01 |
| MAPK5                     | 1.01 | 3.0E-01 |
| MK13                      | 0.99 | 3.0E-01 |
| Integrin a1b1             | 1.01 | 3.0E-01 |
| I-TAC                     | 1.04 | 3.1E-01 |
| NG36                      | 1.01 | 3.1E-01 |
| PTK6                      | 1.02 | 3.1E-01 |
| RBM39                     | 0.98 | 3.1E-01 |
| ApoM                      | 0.98 | 3.1E-01 |
| CAMK2B                    | 1.02 | 3.1E-01 |
| Cadherin-12               | 1.00 | 3.1E-01 |
| TBK1                      | 1.02 | 3.1E-01 |
| Moesin                    | 1.01 | 3.1E-01 |
| Carbonic anhydrase XIII   | 1.10 | 3.1E-01 |
| Coactosin-like protein    | 1.00 | 3.1E-01 |
| EP15R                     | 1.00 | 3.1E-01 |
| IMDH1                     | 1.14 | 3.1E-01 |
| SPARCL1                   | 1.00 | 3.1E-01 |
| CK2-A1:B                  | 1.22 | 3.1E-01 |
| IL-1F7                    | 0.98 | 3.1E-01 |
| PSA6                      | 1.10 | 3.1E-01 |
| HCE004152                 | 0.97 | 3.1E-01 |
| WNK3                      | 1.09 | 3.1E-01 |
| Met                       | 1.01 | 3.2E-01 |
| MK11                      | 1.00 | 3.2E-01 |
| Peroxiredoxin-1           | 1.16 | 3.2E-01 |
| sICAM-2                   | 1.02 | 3.2E-01 |
| ATPO                      | 1.05 | 3.2E-01 |
| IL-15 Ra                  | 0.98 | 3.2E-01 |
| AMNLS                     | 0.99 | 3.2E-01 |
| CYTF                      | 0.99 | 3.2E-01 |
| CAD15                     | 1.03 | 3.2E-01 |
| PTP-1B                    | 1.00 | 3.2E-01 |
| IL-18 Ra                  | 0.99 | 3.2E-01 |
| UB2L3                     | 1.14 | 3.2E-01 |
| IL-1 sRI                  | 1.00 | 3.2E-01 |
| EF-1-beta                 | 1.08 | 3.2E-01 |
| Apo E                     | 0.96 | 3.2E-01 |
| LKHA4                     | 0.96 | 3.2E-01 |
| 40S ribosomal protein SA  | 1.01 | 3.2E-01 |
| CREL1                     | 0.98 | 3.2E-01 |
| IgD                       | 1.02 | 3.2E-01 |
| OLR1                      | 1.00 | 3.2E-01 |
| Nogo Receptor             | 0.99 | 3.2E-01 |
| PHI                       | 1.04 | 3.2E-01 |
| Karyopherin-a2            | 0.97 | 3.2E-01 |
| ARI3A                     | 1.05 | 3.2E-01 |

|                               |      |         |
|-------------------------------|------|---------|
| CEBPB                         | 0.98 | 3.3E-01 |
| MUC1                          | 0.99 | 3.3E-01 |
| IL-2 sRg                      | 1.15 | 3.3E-01 |
| Thyroxine-Binding Globulin    | 1.00 | 3.3E-01 |
| LPPL                          | 0.99 | 3.3E-01 |
| PACAP-38                      | 0.98 | 3.3E-01 |
| protein Z inhibitor           | 1.01 | 3.3E-01 |
| hnRNP K                       | 0.99 | 3.3E-01 |
| IRF1                          | 1.00 | 3.3E-01 |
| TECK                          | 0.99 | 3.3E-01 |
| TEC                           | 1.05 | 3.3E-01 |
| FGF-16                        | 1.18 | 3.3E-01 |
| HXK2                          | 1.01 | 3.4E-01 |
| IL-22BP                       | 0.99 | 3.4E-01 |
| P-Selectin                    | 1.02 | 3.4E-01 |
| IFN-g                         | 0.99 | 3.4E-01 |
| LAG-3                         | 0.99 | 3.4E-01 |
| HEMK2                         | 1.03 | 3.4E-01 |
| ENPP7                         | 1.00 | 3.4E-01 |
| PLPP                          | 1.17 | 3.4E-01 |
| SNP25                         | 0.98 | 3.4E-01 |
| Siglec-9                      | 1.00 | 3.4E-01 |
| BFL1                          | 0.99 | 3.4E-01 |
| Protein C                     | 0.99 | 3.4E-01 |
| WISP-3                        | 1.00 | 3.5E-01 |
| KIF23                         | 1.09 | 3.5E-01 |
| complement factor H-related 5 | 0.98 | 3.5E-01 |
| PESC                          | 0.99 | 3.5E-01 |
| NID2                          | 1.03 | 3.5E-01 |
| C3d                           | 1.01 | 3.5E-01 |
| MK12                          | 1.00 | 3.6E-01 |
| DKK1                          | 0.97 | 3.6E-01 |
| NADPH-P450 Oxidoreductase     | 0.99 | 3.6E-01 |
| PTP-1C                        | 1.03 | 3.6E-01 |
| HAI-1                         | 0.99 | 3.6E-01 |
| TYK2                          | 1.01 | 3.6E-01 |
| KLRF1                         | 0.99 | 3.6E-01 |
| 3HIDH                         | 1.01 | 3.7E-01 |
| Mammaglobin 2                 | 1.02 | 3.7E-01 |
| CHKB                          | 0.99 | 3.7E-01 |
| SMAC                          | 1.01 | 3.7E-01 |
| NCK1                          | 0.99 | 3.7E-01 |
| EPI                           | 1.01 | 3.7E-01 |
| DC-SIGN                       | 0.98 | 3.7E-01 |
| LRRT3                         | 1.00 | 3.7E-01 |
| FGF7                          | 1.01 | 3.7E-01 |
| Stanniocalcin-1               | 1.00 | 3.7E-01 |
| MMP-17                        | 1.03 | 3.7E-01 |
| IL22RA1                       | 1.03 | 3.7E-01 |
| FCN2                          | 1.00 | 3.7E-01 |
| Plasminogen                   | 1.01 | 3.7E-01 |
| bFGF                          | 1.01 | 3.7E-01 |
| LGMN                          | 1.04 | 3.7E-01 |
| EGFRvIII                      | 0.99 | 3.8E-01 |
| FGFR-3                        | 0.99 | 3.8E-01 |
| SPHK2                         | 1.00 | 3.8E-01 |
| TCTP                          | 1.02 | 3.8E-01 |

|                                |      |         |
|--------------------------------|------|---------|
| PGM1                           | 0.99 | 3.8E-01 |
| Fucosyltransferase 3           | 1.00 | 3.8E-01 |
| EPHA3                          | 0.97 | 3.8E-01 |
| FGR                            | 1.03 | 3.8E-01 |
| hnRNP A2/B1                    | 1.01 | 3.8E-01 |
| WFKN1                          | 1.00 | 3.8E-01 |
| Activated Protein C            | 1.06 | 3.8E-01 |
| MCP-4                          | 0.99 | 3.8E-01 |
| GREM1                          | 1.00 | 3.9E-01 |
| NAP-2                          | 0.89 | 3.9E-01 |
| Endothelin-converting enzyme 1 | 1.00 | 3.9E-01 |
| VCAM-1                         | 1.00 | 3.9E-01 |
| Thrombin                       | 0.91 | 3.9E-01 |
| Ubiquitin                      | 1.01 | 3.9E-01 |
| HHLA2                          | 1.00 | 3.9E-01 |
| Apoptosis regulator Bcl-W      | 0.99 | 3.9E-01 |
| TRAIL R2                       | 1.01 | 3.9E-01 |
| CTAP-III                       | 0.91 | 3.9E-01 |
| UBE2N                          | 1.22 | 3.9E-01 |
| Lymphotoxin b R                | 0.97 | 3.9E-01 |
| Ferritin                       | 1.00 | 4.0E-01 |
| Lymphotoxin a2/b1              | 1.00 | 4.0E-01 |
| Annexin V                      | 0.99 | 4.0E-01 |
| MOZ                            | 1.01 | 4.0E-01 |
| FGF-10                         | 1.02 | 4.0E-01 |
| C7                             | 1.00 | 4.0E-01 |
| EGF                            | 1.02 | 4.0E-01 |
| FBLN3                          | 1.00 | 4.0E-01 |
| IL-18 Rb                       | 1.00 | 4.0E-01 |
| H2A3                           | 1.03 | 4.0E-01 |
| Angiostatin                    | 1.02 | 4.1E-01 |
| Caspase-10                     | 1.01 | 4.1E-01 |
| HCE004333                      | 0.98 | 4.1E-01 |
| KYNU                           | 0.97 | 4.1E-01 |
| ING1                           | 1.13 | 4.1E-01 |
| C3a                            | 0.89 | 4.1E-01 |
| ICOS                           | 1.01 | 4.1E-01 |
| JAM-C                          | 1.03 | 4.1E-01 |
| IL-19                          | 1.00 | 4.2E-01 |
| bFGF-R                         | 0.99 | 4.2E-01 |
| CBX5                           | 0.98 | 4.2E-01 |
| ARP19                          | 1.04 | 4.2E-01 |
| amyloid precursor protein      | 0.99 | 4.2E-01 |
| VEGF sR3                       | 0.99 | 4.2E-01 |
| Catalase                       | 1.10 | 4.2E-01 |
| PCSK9                          | 0.99 | 4.2E-01 |
| Properdin                      | 1.02 | 4.2E-01 |
| PPIB                           | 1.04 | 4.2E-01 |
| FGF-17                         | 1.00 | 4.2E-01 |
| OPG                            | 1.00 | 4.2E-01 |
| C1q                            | 1.00 | 4.2E-01 |
| DcR3                           | 1.00 | 4.3E-01 |
| C3                             | 0.84 | 4.3E-01 |
| CSF-1                          | 1.03 | 4.3E-01 |
| MMP-14                         | 0.97 | 4.3E-01 |
| BCAM                           | 0.99 | 4.3E-01 |
| Glucocorticoid receptor        | 1.02 | 4.3E-01 |

|                       |      |         |
|-----------------------|------|---------|
| PCI                   | 1.00 | 4.3E-01 |
| SP-D                  | 1.01 | 4.3E-01 |
| ALCAM                 | 1.02 | 4.3E-01 |
| IFN-lambda 2          | 1.01 | 4.3E-01 |
| gp130, soluble        | 1.01 | 4.3E-01 |
| sCD4                  | 0.98 | 4.3E-01 |
| TGF-b3                | 1.00 | 4.3E-01 |
| eIF-4H                | 1.07 | 4.3E-01 |
| Eotaxin-3             | 1.03 | 4.4E-01 |
| PERL                  | 1.00 | 4.4E-01 |
| RGMA                  | 0.99 | 4.4E-01 |
| GSTA3                 | 0.99 | 4.4E-01 |
| EPHB2                 | 0.98 | 4.4E-01 |
| Collectin Kidney 1    | 1.02 | 4.4E-01 |
| Semaphorin 3E         | 1.00 | 4.4E-01 |
| BDNF                  | 1.05 | 4.4E-01 |
| HMG-1                 | 1.02 | 4.4E-01 |
| FETUB                 | 1.00 | 4.4E-01 |
| CATF                  | 1.00 | 4.4E-01 |
| Semaphorin-6A         | 1.01 | 4.4E-01 |
| URB                   | 0.98 | 4.5E-01 |
| MAPKAPK3              | 1.01 | 4.5E-01 |
| NEGR1                 | 0.99 | 4.5E-01 |
| LRRK2                 | 0.97 | 4.5E-01 |
| GA733-1 protein       | 0.99 | 4.5E-01 |
| IL-4 sR               | 0.98 | 4.5E-01 |
| C8                    | 0.98 | 4.5E-01 |
| Apo E3                | 0.99 | 4.5E-01 |
| HCK                   | 0.99 | 4.5E-01 |
| CK-MM                 | 1.00 | 4.5E-01 |
| PDGF-BB               | 0.88 | 4.5E-01 |
| 6Ckine                | 1.01 | 4.6E-01 |
| Galectin-3            | 1.02 | 4.6E-01 |
| SPTA2                 | 0.99 | 4.6E-01 |
| LIN7B                 | 1.01 | 4.6E-01 |
| STK16                 | 0.99 | 4.6E-01 |
| TIMD3                 | 1.00 | 4.6E-01 |
| Tpo                   | 1.01 | 4.6E-01 |
| Dkk-4                 | 0.98 | 4.6E-01 |
| HCE000342             | 1.03 | 4.6E-01 |
| LYVE1                 | 1.00 | 4.7E-01 |
| Carbonic Anhydrase IV | 0.99 | 4.7E-01 |
| DAPK2                 | 1.03 | 4.7E-01 |
| IL-1Rrp2              | 1.00 | 4.7E-01 |
| SDF-1                 | 0.98 | 4.7E-01 |
| Nidogen               | 1.00 | 4.7E-01 |
| ACE2                  | 1.02 | 4.7E-01 |
| DR6                   | 0.98 | 4.7E-01 |
| NSF1C                 | 1.03 | 4.7E-01 |
| Galectin-4            | 1.00 | 4.7E-01 |
| TXD12                 | 1.00 | 4.7E-01 |
| CD27                  | 0.99 | 4.8E-01 |
| BPI                   | 1.05 | 4.8E-01 |
| PAI-1                 | 0.98 | 4.8E-01 |
| Azurocidin            | 1.01 | 4.8E-01 |
| QORL1                 | 1.00 | 4.8E-01 |
| DRAK2                 | 1.05 | 4.8E-01 |

|                      |      |         |
|----------------------|------|---------|
| Notch 1              | 0.99 | 4.8E-01 |
| Sialoadhesin         | 0.99 | 4.8E-01 |
| Proteinase-3         | 0.99 | 4.8E-01 |
| CD5L                 | 1.00 | 4.9E-01 |
| TCPTP                | 1.01 | 4.9E-01 |
| CLM6                 | 0.99 | 4.9E-01 |
| ANK2                 | 1.00 | 4.9E-01 |
| FLRT3                | 0.97 | 4.9E-01 |
| Protein S            | 1.00 | 4.9E-01 |
| TNFSF18              | 1.01 | 4.9E-01 |
| PLXB2                | 0.99 | 4.9E-01 |
| Myokinase, human     | 1.21 | 4.9E-01 |
| IFN-lambda 1         | 1.04 | 4.9E-01 |
| IL-1F6               | 0.92 | 4.9E-01 |
| sL-Selectin          | 1.00 | 4.9E-01 |
| IgM                  | 1.01 | 4.9E-01 |
| PIGR                 | 1.00 | 4.9E-01 |
| MRC2                 | 1.01 | 5.0E-01 |
| Carbonic anhydrase I | 1.19 | 5.0E-01 |
| AREG                 | 1.19 | 5.0E-01 |
| UNC5H4               | 0.98 | 5.0E-01 |
| OCAD1                | 1.01 | 5.0E-01 |
| Calpastatin          | 1.00 | 5.0E-01 |
| MMEL2                | 1.00 | 5.0E-01 |
| UBC9                 | 1.07 | 5.0E-01 |
| Topoisomerase I      | 1.01 | 5.1E-01 |
| PEDF                 | 1.00 | 5.1E-01 |
| S100A12              | 1.01 | 5.1E-01 |
| IDUA                 | 1.00 | 5.1E-01 |
| OMD                  | 1.00 | 5.1E-01 |
| sRANKL               | 0.97 | 5.1E-01 |
| Cathepsin A          | 1.00 | 5.1E-01 |
| Osteopontin          | 0.97 | 5.1E-01 |
| Angiopoietin-2       | 0.99 | 5.1E-01 |
| BID                  | 1.02 | 5.1E-01 |
| Osteocalcin          | 1.00 | 5.2E-01 |
| HMG1                 | 0.99 | 5.2E-01 |
| TGF-b2               | 1.01 | 5.2E-01 |
| KI3L2                | 1.00 | 5.2E-01 |
| IL-17B R             | 1.00 | 5.2E-01 |
| b-NGF                | 0.99 | 5.2E-01 |
| ITI heavy chain H4   | 1.01 | 5.2E-01 |
| IL-17 RD             | 1.00 | 5.2E-01 |
| MICA                 | 1.01 | 5.2E-01 |
| ISLR2                | 1.00 | 5.2E-01 |
| MP2K4                | 1.01 | 5.3E-01 |
| TMA                  | 1.00 | 5.3E-01 |
| BGN                  | 0.95 | 5.3E-01 |
| RSPO2                | 1.02 | 5.3E-01 |
| ENTP3                | 1.01 | 5.3E-01 |
| TARC                 | 1.02 | 5.3E-01 |
| PLCG1                | 1.01 | 5.3E-01 |
| Cathepsin D          | 0.98 | 5.3E-01 |
| HMGR                 | 1.00 | 5.3E-01 |
| Histone H1.2         | 0.89 | 5.3E-01 |
| NOTC2                | 0.99 | 5.4E-01 |
| ST4S6                | 0.99 | 5.4E-01 |

|                               |      |         |
|-------------------------------|------|---------|
| XPNPEP1                       | 1.05 | 5.4E-01 |
| IL-6 sRa                      | 1.00 | 5.4E-01 |
| C4b                           | 0.96 | 5.4E-01 |
| TNF-b                         | 1.00 | 5.4E-01 |
| ANGL3                         | 1.01 | 5.4E-01 |
| CD177                         | 1.01 | 5.5E-01 |
| 17-beta-HSD 1                 | 1.00 | 5.5E-01 |
| dopa decarboxylase            | 1.00 | 5.5E-01 |
| AMGO2                         | 0.99 | 5.5E-01 |
| TPSG1                         | 0.98 | 5.5E-01 |
| CAMK2D                        | 1.05 | 5.5E-01 |
| MYPC1                         | 0.98 | 5.5E-01 |
| Kallikrein 4                  | 1.02 | 5.5E-01 |
| Vasoactive Intestinal Peptide | 1.04 | 5.5E-01 |
| CHL1                          | 1.01 | 5.6E-01 |
| IL-1b                         | 1.04 | 5.6E-01 |
| sFRP-3                        | 1.02 | 5.6E-01 |
| TrkB                          | 1.00 | 5.6E-01 |
| RAD51                         | 0.99 | 5.6E-01 |
| ASAH1                         | 1.00 | 5.6E-01 |
| SHPS1                         | 0.97 | 5.6E-01 |
| BAFF                          | 0.97 | 5.6E-01 |
| LIF sR                        | 1.01 | 5.6E-01 |
| FCG3B                         | 0.99 | 5.6E-01 |
| IGF-I                         | 1.00 | 5.6E-01 |
| RXFP1                         | 1.01 | 5.7E-01 |
| Carbonic anhydrase 9          | 1.02 | 5.7E-01 |
| Luteinizing hormone           | 1.01 | 5.7E-01 |
| EPHAA                         | 1.00 | 5.7E-01 |
| Kallistatin                   | 1.01 | 5.7E-01 |
| C3adesArg                     | 0.95 | 5.7E-01 |
| Protein disulfide-isomerase   | 1.00 | 5.7E-01 |
| LRP8                          | 1.00 | 5.7E-01 |
| GRN                           | 1.00 | 5.7E-01 |
| ULBP-1                        | 0.99 | 5.7E-01 |
| GX                            | 1.02 | 5.7E-01 |
| PGCB                          | 0.99 | 5.7E-01 |
| BMX                           | 1.00 | 5.7E-01 |
| RNF43                         | 1.01 | 5.8E-01 |
| CRIS3                         | 0.99 | 5.8E-01 |
| Epo                           | 1.02 | 5.8E-01 |
| ZNRF3                         | 1.00 | 5.8E-01 |
| EphB4                         | 1.03 | 5.8E-01 |
| Heparin cofactor II           | 1.00 | 5.8E-01 |
| FCG2A                         | 0.98 | 5.8E-01 |
| COX-2                         | 1.00 | 5.8E-01 |
| RBP                           | 0.99 | 5.8E-01 |
| LDLR                          | 1.00 | 5.8E-01 |
| RSK-like protein kinase       | 1.05 | 5.8E-01 |
| discoidin domain receptor 1   | 0.99 | 5.8E-01 |
| TGF-b R II                    | 1.00 | 5.8E-01 |
| Gro-a                         | 1.04 | 5.9E-01 |
| HPV E7 Type 16                | 1.01 | 5.9E-01 |
| Eotaxin-2                     | 1.01 | 5.9E-01 |
| IL-34                         | 0.99 | 5.9E-01 |
| RANTES                        | 0.92 | 5.9E-01 |
| IL-18 BPa                     | 0.99 | 5.9E-01 |

|                                   |      |         |
|-----------------------------------|------|---------|
| CD39                              | 1.01 | 5.9E-01 |
| DYRK3                             | 1.03 | 6.0E-01 |
| Growth hormone receptor           | 0.99 | 6.0E-01 |
| MICB                              | 0.98 | 6.0E-01 |
| MCP-1                             | 1.05 | 6.0E-01 |
| DPP2                              | 1.02 | 6.0E-01 |
| BMPER                             | 1.00 | 6.0E-01 |
| GV                                | 1.01 | 6.0E-01 |
| kallikrein 5                      | 1.00 | 6.0E-01 |
| ROR1                              | 0.99 | 6.1E-01 |
| SAP                               | 0.99 | 6.1E-01 |
| HGFA                              | 1.00 | 6.1E-01 |
| Tropomyosin 1 alpha chain         | 1.01 | 6.1E-01 |
| TrkA                              | 1.04 | 6.1E-01 |
| PAK7                              | 1.01 | 6.1E-01 |
| ERBB1                             | 1.01 | 6.2E-01 |
| HXK1                              | 1.01 | 6.2E-01 |
| Kallikrein 6                      | 0.98 | 6.2E-01 |
| HSP 70                            | 0.98 | 6.2E-01 |
| MMP-9                             | 1.03 | 6.2E-01 |
| Ephrin-B3                         | 1.00 | 6.2E-01 |
| ARSB                              | 1.00 | 6.3E-01 |
| Activin A                         | 0.99 | 6.3E-01 |
| IL-3                              | 1.03 | 6.3E-01 |
| IGF-I sR                          | 1.00 | 6.3E-01 |
| HRG                               | 1.00 | 6.3E-01 |
| 3HAO                              | 1.00 | 6.3E-01 |
| Troponin I, skeletal, fast twitch | 0.95 | 6.3E-01 |
| IL-1 R AcP                        | 1.01 | 6.3E-01 |
| GRB2-related adapter protein 2    | 1.03 | 6.3E-01 |
| IL-17D                            | 1.00 | 6.3E-01 |
| C5                                | 1.01 | 6.3E-01 |
| JAG2                              | 0.98 | 6.4E-01 |
| HPLN1                             | 0.98 | 6.4E-01 |
| CNDP1                             | 1.02 | 6.4E-01 |
| IL-27                             | 0.99 | 6.4E-01 |
| Glutathione S-transferase Pi      | 0.97 | 6.4E-01 |
| Cytochrome c                      | 0.99 | 6.4E-01 |
| LDH-H 1                           | 1.02 | 6.4E-01 |
| CRTAM                             | 1.01 | 6.4E-01 |
| Esterase D                        | 1.04 | 6.5E-01 |
| GFRa-2                            | 1.00 | 6.5E-01 |
| CDK2/cyclin A                     | 1.00 | 6.5E-01 |
| C2                                | 1.00 | 6.5E-01 |
| CRK                               | 0.98 | 6.5E-01 |
| GCP-2                             | 0.98 | 6.5E-01 |
| Midkine                           | 1.03 | 6.5E-01 |
| GI24                              | 1.01 | 6.5E-01 |
| NCAM-L1                           | 1.01 | 6.5E-01 |
| IL-10 Ra                          | 0.98 | 6.5E-01 |
| HCE004331                         | 1.12 | 6.5E-01 |
| MIF                               | 1.01 | 6.5E-01 |
| CD30                              | 1.01 | 6.5E-01 |
| DAF                               | 1.00 | 6.5E-01 |
| Hemoglobin                        | 1.19 | 6.5E-01 |
| Coagulation Factor Xa             | 1.00 | 6.6E-01 |
| CSK21                             | 1.02 | 6.6E-01 |

|                             |      |         |
|-----------------------------|------|---------|
| RS3A                        | 1.03 | 6.6E-01 |
| PAK3                        | 0.99 | 6.6E-01 |
| Siglec-7                    | 1.00 | 6.6E-01 |
| sCD163                      | 1.00 | 6.6E-01 |
| SCF sR                      | 1.00 | 6.6E-01 |
| MIG                         | 1.01 | 6.6E-01 |
| C4                          | 1.00 | 6.7E-01 |
| FCGR1                       | 1.02 | 6.7E-01 |
| P-Cadherin                  | 0.99 | 6.7E-01 |
| NXPH1                       | 1.03 | 6.7E-01 |
| FGFR4                       | 1.03 | 6.7E-01 |
| SLIK1                       | 1.02 | 6.7E-01 |
| SIG14                       | 1.02 | 6.7E-01 |
| CD30 Ligand                 | 0.99 | 6.7E-01 |
| sTie-2                      | 1.00 | 6.7E-01 |
| paraoxonase 1               | 1.01 | 6.7E-01 |
| Macrophage mannose receptor | 0.99 | 6.7E-01 |
| TGM3                        | 0.97 | 6.8E-01 |
| OSM                         | 0.98 | 6.8E-01 |
| TGF-b1                      | 1.02 | 6.8E-01 |
| NET1                        | 0.92 | 6.8E-01 |
| LTBP4                       | 1.00 | 6.9E-01 |
| Endostatin                  | 1.01 | 6.9E-01 |
| pTEN                        | 1.00 | 6.9E-01 |
| CCL28                       | 0.97 | 6.9E-01 |
| IF4A3                       | 1.03 | 6.9E-01 |
| Cathepsin H                 | 0.99 | 6.9E-01 |
| FSH                         | 0.99 | 6.9E-01 |
| WIF-1                       | 1.00 | 6.9E-01 |
| IGF-II receptor             | 1.01 | 6.9E-01 |
| TLR4:MD-2 complex           | 0.99 | 6.9E-01 |
| Carbonic Anhydrase X        | 1.00 | 6.9E-01 |
| LRRT1                       | 1.02 | 6.9E-01 |
| CD47                        | 1.04 | 7.0E-01 |
| MSP R                       | 0.98 | 7.0E-01 |
| PIGF                        | 0.99 | 7.0E-01 |
| Rb                          | 1.00 | 7.0E-01 |
| Apo B                       | 0.98 | 7.0E-01 |
| Cadherin-6                  | 0.99 | 7.0E-01 |
| Protease nexin I            | 1.02 | 7.0E-01 |
| PolyUbiquitin K48           | 1.08 | 7.1E-01 |
| Coagulation Factor V        | 1.02 | 7.1E-01 |
| CDK5/p35                    | 1.00 | 7.1E-01 |
| MIP-3b                      | 1.02 | 7.1E-01 |
| GPC2                        | 0.99 | 7.1E-01 |
| ILT-2                       | 1.00 | 7.1E-01 |
| sE-Selectin                 | 1.00 | 7.1E-01 |
| Spondin-1                   | 1.01 | 7.1E-01 |
| MATN3                       | 1.03 | 7.1E-01 |
| Apo D                       | 0.98 | 7.1E-01 |
| EDAR                        | 0.98 | 7.2E-01 |
| Carbonic anhydrase VII      | 1.01 | 7.2E-01 |
| Lactoferrin                 | 1.03 | 7.2E-01 |
| NKG2D                       | 1.00 | 7.2E-01 |
| FST                         | 1.02 | 7.2E-01 |
| GNS                         | 1.00 | 7.2E-01 |
| XTP3A                       | 0.99 | 7.2E-01 |



|                      |      |         |
|----------------------|------|---------|
| TSG-6                | 1.02 | 7.2E-01 |
| Survivin             | 0.99 | 7.3E-01 |
| Angiotensinogen      | 1.00 | 7.3E-01 |
| ANGL4                | 1.04 | 7.3E-01 |
| SOD3                 | 0.99 | 7.3E-01 |
| Tropomyosin 2        | 0.98 | 7.3E-01 |
| AK1A1                | 0.99 | 7.4E-01 |
| Adrenomedullin       | 1.01 | 7.4E-01 |
| Apo E4               | 1.04 | 7.4E-01 |
| LRIG3                | 0.99 | 7.4E-01 |
| Lamin-B1             | 1.02 | 7.4E-01 |
| RANK                 | 1.04 | 7.4E-01 |
| EDA                  | 1.01 | 7.4E-01 |
| HIPK3                | 1.00 | 7.4E-01 |
| FGFR-2               | 0.99 | 7.4E-01 |
| SEPR                 | 1.00 | 7.4E-01 |
| IL-17 sR             | 1.00 | 7.5E-01 |
| IR                   | 1.00 | 7.5E-01 |
| PDE7A                | 1.00 | 7.5E-01 |
| ABL2                 | 1.03 | 7.5E-01 |
| PKC-D                | 0.99 | 7.5E-01 |
| Nr-CAM               | 1.00 | 7.5E-01 |
| MO2R1                | 1.00 | 7.5E-01 |
| CNTFR alpha          | 0.99 | 7.5E-01 |
| ROBO3                | 1.01 | 7.5E-01 |
| NCAM-120             | 1.01 | 7.6E-01 |
| ARG11                | 1.01 | 7.6E-01 |
| sTie-1               | 1.00 | 7.6E-01 |
| Livin B              | 1.02 | 7.6E-01 |
| TNF sR-II            | 0.99 | 7.6E-01 |
| B7-H2                | 1.02 | 7.6E-01 |
| OX40 Ligand          | 0.98 | 7.6E-01 |
| hnRNP A/B            | 1.02 | 7.7E-01 |
| PAPP-A               | 0.99 | 7.7E-01 |
| Mesothelin           | 1.02 | 7.7E-01 |
| PAFAH                | 1.01 | 7.7E-01 |
| FCG2B                | 1.00 | 7.7E-01 |
| HCE003167            | 1.01 | 7.8E-01 |
| IL-13                | 0.99 | 7.8E-01 |
| CD40 ligand, soluble | 1.04 | 7.8E-01 |
| CATE                 | 1.01 | 7.8E-01 |
| GFRa-1               | 0.99 | 7.8E-01 |
| HB-EGF               | 0.99 | 7.8E-01 |
| KI2L4                | 1.06 | 7.8E-01 |
| IL-13 Ra1            | 0.99 | 7.8E-01 |
| ZAP70                | 0.98 | 7.8E-01 |
| BMP-14               | 1.01 | 7.9E-01 |
| TBP                  | 1.01 | 7.9E-01 |
| SUMO3                | 1.00 | 7.9E-01 |
| kallikrein 14        | 0.99 | 7.9E-01 |
| CD226                | 1.00 | 7.9E-01 |
| MMP-13               | 0.98 | 7.9E-01 |
| ON                   | 0.94 | 7.9E-01 |
| FAK1                 | 1.01 | 7.9E-01 |
| sICAM-5              | 1.00 | 7.9E-01 |
| Angiopoietin-4       | 1.01 | 7.9E-01 |
| PCSK7                | 0.98 | 8.0E-01 |

|                      |      |         |
|----------------------|------|---------|
| SEM6B                | 1.00 | 8.0E-01 |
| Insulin              | 0.92 | 8.0E-01 |
| Afamin               | 1.01 | 8.0E-01 |
| Fas, soluble         | 1.00 | 8.0E-01 |
| TRAIL R1             | 0.98 | 8.0E-01 |
| WFKN2                | 0.99 | 8.0E-01 |
| DLL1                 | 0.99 | 8.0E-01 |
| C1QR1                | 1.00 | 8.0E-01 |
| Ubiquitin+1          | 1.13 | 8.0E-01 |
| Soggy-1              | 1.04 | 8.0E-01 |
| G-CSF-R              | 1.00 | 8.0E-01 |
| 14-3-3 protein theta | 1.00 | 8.1E-01 |
| PLK-1                | 1.01 | 8.1E-01 |
| NRX3B                | 1.00 | 8.1E-01 |
| IL-6                 | 0.98 | 8.1E-01 |
| Contactin-4          | 1.00 | 8.1E-01 |
| MMP-16               | 1.01 | 8.1E-01 |
| Galectin-8           | 0.99 | 8.1E-01 |
| Plasmin              | 1.00 | 8.1E-01 |
| JAK2                 | 1.03 | 8.2E-01 |
| FGF-12               | 1.00 | 8.2E-01 |
| PSMA                 | 0.97 | 8.2E-01 |
| RS3                  | 1.03 | 8.2E-01 |
| CD48                 | 0.99 | 8.2E-01 |
| CD22                 | 1.01 | 8.2E-01 |
| a1-Antitrypsin       | 1.04 | 8.2E-01 |
| AURKB                | 1.00 | 8.2E-01 |
| EFNB2                | 0.97 | 8.2E-01 |
| AFP                  | 1.00 | 8.2E-01 |
| HCE003183            | 1.00 | 8.2E-01 |
| sICAM-1              | 1.00 | 8.2E-01 |
| WISP-1               | 1.03 | 8.3E-01 |
| NAGK                 | 0.99 | 8.3E-01 |
| Thyroglobulin        | 0.99 | 8.3E-01 |
| IL-4                 | 1.02 | 8.3E-01 |
| Chymase              | 1.01 | 8.3E-01 |
| a2-Macroglobulin     | 0.94 | 8.3E-01 |
| CLC1B                | 1.04 | 8.3E-01 |
| Cardiotrophin-1      | 1.00 | 8.3E-01 |
| CAPG                 | 0.97 | 8.4E-01 |
| Activin AB           | 0.99 | 8.4E-01 |
| Enterokinase         | 1.01 | 8.4E-01 |
| Galectin-7           | 1.01 | 8.4E-01 |
| PLXC1                | 0.99 | 8.4E-01 |
| IL-10                | 1.00 | 8.4E-01 |
| Thymidine kinase     | 0.98 | 8.4E-01 |
| PARK7                | 0.96 | 8.5E-01 |
| Contactin-5          | 1.00 | 8.5E-01 |
| MIP-3a               | 0.99 | 8.5E-01 |
| HPV E7 Type18        | 1.01 | 8.5E-01 |
| YKL-40               | 0.96 | 8.5E-01 |
| CHST2                | 1.00 | 8.6E-01 |
| IL-16                | 1.01 | 8.6E-01 |
| SORC2                | 1.01 | 8.6E-01 |
| Hemopexin            | 1.00 | 8.6E-01 |
| IL-1F8               | 0.99 | 8.6E-01 |
| contactin-1          | 0.99 | 8.6E-01 |

|                                  |      |         |
|----------------------------------|------|---------|
| Prekallikrein                    | 0.99 | 8.6E-01 |
| GHC2                             | 1.01 | 8.7E-01 |
| CD83                             | 0.99 | 8.7E-01 |
| sLeptin R                        | 1.00 | 8.7E-01 |
| SSRP1                            | 0.99 | 8.7E-01 |
| LCK                              | 1.01 | 8.7E-01 |
| MMP-3                            | 0.97 | 8.7E-01 |
| Arylsulfatase A                  | 0.98 | 8.7E-01 |
| PIM1                             | 1.01 | 8.7E-01 |
| MATK                             | 1.00 | 8.7E-01 |
| DKK3                             | 0.99 | 8.7E-01 |
| ERBB3                            | 1.00 | 8.7E-01 |
| TLR2                             | 0.97 | 8.7E-01 |
| DnaJ homolog                     | 1.01 | 8.7E-01 |
| Calcineurin B a                  | 1.01 | 8.7E-01 |
| Elastase                         | 1.00 | 8.8E-01 |
| annexin I                        | 1.00 | 8.8E-01 |
| TACI                             | 1.02 | 8.8E-01 |
| FCAR                             | 1.00 | 8.8E-01 |
| PDE4D                            | 1.00 | 8.8E-01 |
| Macrophage scavenger receptor    | 1.02 | 8.8E-01 |
| Myeloperoxidase                  | 1.01 | 8.8E-01 |
| VEGF-D                           | 0.96 | 8.9E-01 |
| I-309                            | 1.00 | 8.9E-01 |
| 6-Phosphogluconate dehydrogenase | 1.11 | 8.9E-01 |
| PDE3A                            | 1.02 | 8.9E-01 |
| 4-1BB ligand                     | 1.00 | 8.9E-01 |
| PK3CG                            | 1.00 | 8.9E-01 |
| ARTS1                            | 0.98 | 8.9E-01 |
| FGF-6                            | 1.05 | 8.9E-01 |
| BOC                              | 0.97 | 8.9E-01 |
| IFN-aA                           | 0.98 | 8.9E-01 |
| EMAP-2                           | 1.00 | 9.0E-01 |
| calgranulin B                    | 1.07 | 9.0E-01 |
| BSP                              | 0.98 | 9.0E-01 |
| IL-2 sRa                         | 1.01 | 9.0E-01 |
| H6ST1                            | 1.00 | 9.0E-01 |
| suPAR                            | 0.99 | 9.0E-01 |
| BLC                              | 1.02 | 9.0E-01 |
| ULBP-3                           | 1.02 | 9.0E-01 |
| G-CSF                            | 0.97 | 9.1E-01 |
| C5b, 6 Complex                   | 1.00 | 9.1E-01 |
| IL-1 sR9                         | 0.99 | 9.1E-01 |
| MED-1                            | 1.03 | 9.1E-01 |
| M-CSF R                          | 1.00 | 9.1E-01 |
| Peroxiredoxin-6                  | 1.17 | 9.1E-01 |
| a2-HS-Glycoprotein               | 1.00 | 9.1E-01 |
| TLR4                             | 0.99 | 9.1E-01 |
| TFPI                             | 1.02 | 9.1E-01 |
| SMOC1                            | 1.00 | 9.2E-01 |
| CBG                              | 1.03 | 9.2E-01 |
| ER                               | 1.00 | 9.2E-01 |
| HCE000414                        | 1.00 | 9.2E-01 |
| GIIE                             | 1.01 | 9.2E-01 |
| MMP-1                            | 0.98 | 9.2E-01 |
| VEGF sR2                         | 1.01 | 9.2E-01 |
| LSAMP                            | 1.00 | 9.2E-01 |

|                             |      |         |
|-----------------------------|------|---------|
| PECAM-1                     | 0.99 | 9.2E-01 |
| Alpha enolase               | 0.98 | 9.2E-01 |
| C1QBP                       | 1.00 | 9.2E-01 |
| sICAM-3                     | 1.00 | 9.3E-01 |
| CDON                        | 0.99 | 9.3E-01 |
| IL-1 sRII                   | 1.01 | 9.3E-01 |
| FGF-4                       | 1.00 | 9.3E-01 |
| SLIK5                       | 0.98 | 9.3E-01 |
| Adiponectin                 | 0.99 | 9.3E-01 |
| JAG1                        | 0.99 | 9.3E-01 |
| TWEAK                       | 0.99 | 9.3E-01 |
| p27Kip1                     | 1.00 | 9.3E-01 |
| PDGF-AA                     | 1.01 | 9.3E-01 |
| Prolactin Receptor          | 0.99 | 9.3E-01 |
| Fractalkine/CX3CL-1         | 0.99 | 9.4E-01 |
| MMP-8                       | 1.01 | 9.4E-01 |
| CDK1/cyclin B               | 0.99 | 9.4E-01 |
| IL-20                       | 1.01 | 9.4E-01 |
| Siglec-6                    | 1.00 | 9.4E-01 |
| Cadherin-2                  | 1.00 | 9.4E-01 |
| FLRT1                       | 1.03 | 9.5E-01 |
| kallikrein 12               | 0.97 | 9.5E-01 |
| CAMK1                       | 1.00 | 9.5E-01 |
| TAFI                        | 1.01 | 9.5E-01 |
| Cadherin E                  | 1.00 | 9.5E-01 |
| BRF-1                       | 0.99 | 9.5E-01 |
| Coagulation Factor XI       | 1.00 | 9.5E-01 |
| TAK1-TAB1                   | 1.05 | 9.5E-01 |
| CHK1                        | 0.99 | 9.5E-01 |
| ROBO2                       | 1.00 | 9.5E-01 |
| OBCAM                       | 1.04 | 9.6E-01 |
| p53                         | 1.01 | 9.6E-01 |
| SHBG                        | 1.00 | 9.6E-01 |
| 14-3-3E                     | 0.99 | 9.6E-01 |
| GDNF                        | 1.01 | 9.6E-01 |
| RET                         | 1.00 | 9.6E-01 |
| IL-17 RC                    | 1.00 | 9.6E-01 |
| IGFBP-3                     | 1.01 | 9.6E-01 |
| Coagulation Factor X        | 1.00 | 9.6E-01 |
| MDM2                        | 1.01 | 9.7E-01 |
| TSP2                        | 0.97 | 9.7E-01 |
| Gro-b/g                     | 0.98 | 9.7E-01 |
| CD97                        | 0.99 | 9.7E-01 |
| Apo E2                      | 1.01 | 9.7E-01 |
| PDE9A                       | 1.01 | 9.7E-01 |
| ENTP5                       | 0.99 | 9.7E-01 |
| BCAR3                       | 1.04 | 9.8E-01 |
| Olfactomedin-4              | 1.00 | 9.8E-01 |
| Discoidin domain receptor 2 | 1.00 | 9.8E-01 |
| STAB2                       | 1.00 | 9.8E-01 |
| PAFAH beta subunit          | 1.05 | 9.8E-01 |
| Gelsolin                    | 1.02 | 9.9E-01 |
| HINT1                       | 1.02 | 9.9E-01 |
| Marapsin                    | 1.05 | 9.9E-01 |
| JAML1                       | 0.99 | 9.9E-01 |
| UBP25                       | 1.00 | 9.9E-01 |
| GP1BA                       | 1.01 | 9.9E-01 |

|                    |      |         |
|--------------------|------|---------|
| BMP RII            | 0.98 | 9.9E-01 |
| IL-23 R            | 1.01 | 9.9E-01 |
| VEGF-C             | 1.00 | 9.9E-01 |
| TGF- $\beta$ R III | 1.01 | 9.9E-01 |
| LY86               | 1.00 | 9.9E-01 |
| MATN2              | 1.00 | 9.9E-01 |
| TCCR               | 0.99 | 9.9E-01 |
| CLC7A              | 1.02 | 9.9E-01 |
| UB2G2              | 1.01 | 1.0E+00 |
| FGF23              | 0.96 | 1.0E+00 |
| DLC8               | 1.00 | 1.0E+00 |

V, venous; A, arterial

**Table S2.** Significant protein associations with baseline eGFR in JHS and FHS

| Protein                | JHS                                          |          |                                                            |         | FHS                            |         |                                             |         |
|------------------------|----------------------------------------------|----------|------------------------------------------------------------|---------|--------------------------------|---------|---------------------------------------------|---------|
|                        | Adjusted for age, sex, <i>APOL1</i> (n=1928) |          | Adjusted for age, sex, <i>APOL1</i> , albuminuria (n=1033) |         | Adjusted for age, sex (n=1621) |         | Adjusted for age, sex, albuminuria (n=1556) |         |
|                        | Beta                                         | P        | Beta                                                       | P       | Beta                           | P       | Beta                                        | P       |
| RELT                   | -0.0275                                      | 6.0E-174 | -0.0272                                                    | 1.7E-74 | -0.012                         | 7.3E-23 | -0.0145                                     | 5.0E-24 |
| IGFBP-6                | -0.0275                                      | 4.4E-173 | -0.0262                                                    | 3.8E-69 | -0.017                         | 2.7E-44 | -0.0205                                     | 5.3E-46 |
| Cystatin C             | -0.0276                                      | 6.6E-171 | -0.0269                                                    | 1.4E-70 | -0.0142                        | 5.6E-31 | -0.0176                                     | 2.3E-34 |
| ARMEL                  | -0.0265                                      | 1.5E-144 | -0.0268                                                    | 7.5E-61 | -0.0148                        | 1.3E-29 | -0.0185                                     | 1.5E-33 |
| Beta2-Microglobulin    | -0.0243                                      | 1.7E-130 | -0.0241                                                    | 1.6E-55 | -0.0126                        | 2.6E-24 | -0.015                                      | 1.2E-24 |
| DSC2                   | -0.0248                                      | 1.0E-125 | -0.0212                                                    | 2.1E-38 | -0.013                         | 5.2E-14 | -0.0166                                     | 2.7E-15 |
| CD59                   | -0.0237                                      | 1.9E-110 | -0.022                                                     | 1.3E-40 | -0.0089                        | 4.6E-08 | -0.0124                                     | 1.9E-10 |
| Ephrin-A4              | -0.0238                                      | 9.5E-106 | -0.0222                                                    | 3.4E-39 | -0.009                         | 6.0E-12 | -0.0116                                     | 5.0E-14 |
| EFNB2                  | -0.0234                                      | 9.8E-102 | -0.0215                                                    | 6.1E-37 | -0.0133                        | 2.0E-14 | -0.0169                                     | 4.5E-16 |
| RGMB                   | -0.0237                                      | 2.8E-101 | -0.0222                                                    | 1.4E-36 | -0.016                         | 1.8E-33 | -0.0191                                     | 7.3E-34 |
| DAN                    | -0.0227                                      | 3.1E-100 | -0.02                                                      | 1.5E-35 | -0.0096                        | 3.8E-15 | -0.012                                      | 8.1E-17 |
| FSTL3                  | -0.0217                                      | 4.1E-97  | -0.0185                                                    | 1.9E-31 | -0.0078                        | 1.0E-09 | -0.0105                                     | 4.9E-12 |
| TNF sR-I               | -0.0226                                      | 3.8E-96  | -0.0199                                                    | 1.9E-35 | -0.0085                        | 3.5E-11 | -0.0116                                     | 1.3E-14 |
| ESAM                   | -0.0225                                      | 2.8E-95  | -0.021                                                     | 1.4E-36 | -0.0149                        | 1.2E-30 | -0.0184                                     | 3.1E-33 |
| JAM-B                  | -0.0222                                      | 1.9E-93  | -0.0208                                                    | 1.4E-35 | -0.0131                        | 2.1E-22 | -0.0167                                     | 2.8E-26 |
| UNC5H3                 | -0.0218                                      | 2.9E-92  | -0.0198                                                    | 3.0E-32 | -0.0101                        | 2.4E-14 | -0.0127                                     | 5.0E-16 |
| Ephrin-A5              | -0.0216                                      | 3.0E-83  | -0.0193                                                    | 9.1E-30 | -0.0107                        | 2.0E-15 | -0.0131                                     | 1.7E-16 |
| Epithelial cell kinase | -0.0205                                      | 5.9E-82  | -0.0176                                                    | 8.0E-26 | -0.011                         | 4.7E-17 | -0.0136                                     | 9.1E-19 |
| EphB6                  | -0.022                                       | 3.8E-81  | -0.0188                                                    | 2.9E-25 | -0.013                         | 8.4E-23 | -0.0156                                     | 1.9E-23 |
| MP2K2                  | -0.0208                                      | 4.7E-81  | -0.0201                                                    | 2.7E-31 | -0.0073                        | 4.3E-08 | -0.0095                                     | 1.6E-09 |
| PIANP                  | -0.0217                                      | 6.0E-81  | -0.0192                                                    | 3.8E-27 | -0.0111                        | 1.3E-10 | -0.0147                                     | 1.7E-12 |
| DAF                    | -0.021                                       | 3.9E-80  | -0.0192                                                    | 4.7E-30 | -0.0087                        | 7.1E-11 | -0.0114                                     | 2.7E-13 |
| TNF sR-II              | -0.0208                                      | 6.1E-78  | -0.0186                                                    | 3.8E-28 | -0.0067                        | 3.6E-07 | -0.0089                                     | 1.2E-08 |
| Endostatin             | -0.0201                                      | 9.8E-77  | -0.0173                                                    | 1.0E-24 | -0.0097                        | 1.6E-13 | -0.0124                                     | 1.2E-15 |
| Testican-2             | 0.0198                                       | 3.6E-70  | 0.0183                                                     | 4.1E-28 | 0.0099                         | 3.8E-13 | 0.0132                                      | 3.4E-16 |
| Myoglobin              | -0.0184                                      | 1.2E-69  | -0.0176                                                    | 1.4E-26 | -0.0117                        | 9.5E-21 | -0.014                                      | 2.7E-21 |
| ROR1                   | -0.0195                                      | 1.1E-66  | -0.0175                                                    | 5.2E-23 | -0.0115                        | 5.7E-11 | -0.0144                                     | 1.1E-11 |
| TAJ                    | -0.0192                                      | 4.1E-66  | -0.0151                                                    | 3.3E-17 | -0.0124                        | 1.3E-20 | -0.0147                                     | 6.5E-21 |
| GAS1                   | -0.0193                                      | 1.4E-65  | -0.017                                                     | 1.1E-22 | -0.0086                        | 5.4E-07 | -0.0108                                     | 1.4E-07 |
| UNC5H4                 | -0.0196                                      | 6.8E-63  | -0.0169                                                    | 8.8E-20 | -0.0128                        | 9.0E-23 | -0.0156                                     | 3.4E-24 |
| SMOC1                  | -0.0174                                      | 2.7E-61  | -0.0167                                                    | 2.1E-24 | -0.0086                        | 1.4E-07 | -0.0115                                     | 7.0E-09 |
| Cystatin M             | -0.0173                                      | 1.1E-59  | -0.0143                                                    | 2.4E-18 | -0.0119                        | 2.0E-20 | -0.0145                                     | 6.8E-22 |

|                                   |         |         |         |         |         |         |         |         |
|-----------------------------------|---------|---------|---------|---------|---------|---------|---------|---------|
| Lipocalin 2                       | -0.0186 | 5.2E-59 | -0.0155 | 9.6E-18 | -0.0118 | 4.3E-18 | -0.0148 | 1.8E-20 |
| HCC-1                             | -0.0183 | 4.2E-58 | -0.0165 | 1.5E-21 | -0.0076 | 1.2E-08 | -0.0094 | 2.0E-09 |
| CNTFR alpha                       | -0.0181 | 1.2E-56 | -0.0173 | 2.7E-22 | -0.01   | 2.7E-13 | -0.0132 | 4.8E-16 |
| DR6                               | -0.0182 | 1.4E-55 | -0.0153 | 3.9E-17 | -0.0089 | 9.1E-11 | -0.011  | 1.3E-11 |
| Angiogenin                        | -0.017  | 2.7E-51 | -0.0166 | 5.0E-22 | -0.0076 | 1.4E-09 | -0.0098 | 5.7E-11 |
| TGF-b R III                       | -0.0175 | 1.2E-50 | -0.0169 | 1.1E-19 | -0.0122 | 4.8E-19 | -0.0144 | 5.5E-19 |
| PSP                               | -0.0164 | 3.2E-50 | -0.0158 | 1.1E-20 | -0.0103 | 5.7E-09 | -0.0128 | 1.9E-09 |
| Troponin T                        | -0.0146 | 6.3E-50 | -0.0125 | 5.0E-17 | -0.0062 | 7.1E-05 | -0.0079 | 2.1E-05 |
| Layilin                           | -0.0162 | 7.9E-50 | -0.0147 | 5.0E-18 | -0.0115 | 1.5E-20 | -0.0137 | 5.1E-21 |
| Factor D                          | -0.0164 | 8.7E-49 | -0.0172 | 1.8E-23 | -0.0085 | 2.6E-11 | -0.0113 | 4.2E-14 |
| TFF3                              | -0.0159 | 2.9E-47 | -0.0149 | 2.8E-18 | -0.0059 | 8.3E-06 | -0.0058 | 1.6E-04 |
| CgA                               | -0.0162 | 7.3E-47 | -0.012  | 5.1E-13 | -0.0092 | 3.5E-07 | -0.011  | 4.9E-07 |
| NRX1B                             | -0.0168 | 1.9E-46 | -0.0136 | 1.7E-13 | -0.0086 | 1.4E-10 | -0.011  | 2.7E-12 |
| EFNB1                             | -0.0163 | 6.8E-46 | -0.0147 | 1.8E-16 | -0.0106 | 2.4E-09 | -0.014  | 9.3E-11 |
| NEGR1                             | -0.0161 | 1.7E-44 | -0.0156 | 5.2E-18 | -0.0093 | 9.0E-08 | -0.013  | 5.4E-10 |
| IL-17F                            | -0.0158 | 2.3E-44 | -0.0131 | 4.6E-14 | -0.0052 | 7.2E-05 | -0.0082 | 1.4E-07 |
| MATN2                             | -0.0162 | 3.0E-44 | -0.0126 | 1.3E-12 | -0.0073 | 1.8E-08 | -0.0087 | 1.3E-08 |
| IGFBP-5                           | -0.0155 | 3.5E-44 | -0.0123 | 5.3E-13 | -0.0069 | 1.2E-07 | -0.0079 | 2.5E-07 |
| FBLN3                             | -0.0143 | 4.3E-44 | -0.0126 | 1.7E-14 | -0.0084 | 4.1E-07 | -0.0101 | 4.3E-07 |
| DLL1                              | -0.0161 | 1.8E-43 | -0.0147 | 2.6E-17 | -0.0072 | 1.3E-07 | -0.0081 | 4.5E-07 |
| FLRT2                             | -0.0154 | 8.0E-42 | -0.0125 | 5.1E-13 | -0.0088 | 6.6E-07 | -0.011  | 2.1E-07 |
| Troponin I, skeletal, fast twitch | -0.0139 | 8.9E-41 | -0.0124 | 5.5E-14 | -0.0061 | 2.6E-06 | -0.0059 | 9.5E-05 |
| VEGF                              | -0.015  | 3.4E-40 | -0.0129 | 1.1E-12 | -0.0055 | 3.0E-05 | -0.0064 | 4.2E-05 |
| Trypsin                           | -0.0156 | 3.9E-40 | -0.0143 | 7.3E-15 | -0.0065 | 2.0E-06 | -0.0083 | 2.0E-07 |
| NRX3B                             | -0.0151 | 3.3E-39 | -0.013  | 5.7E-13 | -0.0062 | 4.7E-06 | -0.0076 | 1.7E-06 |
| DERM                              | -0.0142 | 4.2E-39 | -0.0146 | 1.8E-18 | -0.0054 | 2.5E-05 | -0.0072 | 1.7E-06 |
| Elafin                            | -0.0152 | 7.3E-39 | -0.0106 | 1.8E-09 | -0.0058 | 2.2E-05 | -0.0079 | 7.9E-07 |
| Carbonic anhydrase III            | -0.0139 | 1.7E-37 | -0.0107 | 2.3E-10 | -0.0073 | 2.1E-08 | -0.0089 | 4.9E-09 |
| kallikrein 8                      | -0.0148 | 1.9E-37 | -0.0121 | 1.3E-11 | -0.0091 | 1.7E-11 | -0.0109 | 1.1E-11 |
| CYTD                              | -0.0137 | 1.9E-34 | -0.012  | 2.8E-12 | -0.0076 | 1.9E-08 | -0.01   | 3.6E-10 |
| MIA                               | -0.0141 | 3.1E-33 | -0.0159 | 3.4E-17 | -0.0127 | 1.6E-20 | -0.0136 | 2.4E-17 |
| SLIK5                             | -0.014  | 5.9E-33 | -0.0134 | 2.5E-13 | -0.0089 | 1.2E-12 | -0.0107 | 1.2E-12 |
| Ck-b-8-1                          | -0.0136 | 1.2E-31 | -0.0126 | 4.1E-12 | -0.0066 | 2.2E-06 | -0.0093 | 1.3E-08 |
| bFGF-R                            | -0.0131 | 6.7E-30 | -0.0126 | 3.8E-12 | -0.0091 | 3.9E-07 | -0.0111 | 2.1E-07 |
| LGMN                              | 0.0131  | 1.1E-29 | 0.0119  | 1.2E-11 | 0.0074  | 2.5E-08 | 0.0091  | 8.4E-09 |
| Cadherin-6                        | 0.0126  | 8.8E-29 | 0.0107  | 4.1E-10 | 0.0076  | 1.6E-08 | 0.0102  | 1.6E-10 |
| MIP-5                             | -0.0129 | 3.5E-28 | -0.0106 | 4.2E-09 | -0.0071 | 2.1E-07 | -0.0077 | 1.4E-06 |
| CYTT                              | -0.0125 | 6.7E-28 | -0.0116 | 1.2E-10 | -0.0094 | 9.4E-12 | -0.012  | 1.6E-13 |

|                              |         |         |         |         |         |         |         |         |
|------------------------------|---------|---------|---------|---------|---------|---------|---------|---------|
| Gelsolin                     | -0.0121 | 1.6E-26 | -0.0138 | 3.0E-14 | -0.0128 | 9.6E-22 | -0.0155 | 3.9E-23 |
| IL-18 BPa                    | -0.0122 | 1.6E-26 | -0.0105 | 3.0E-09 | -0.0053 | 5.7E-05 | -0.0068 | 1.1E-05 |
| Fractalkine/CX3CL-1          | -0.0122 | 7.3E-26 | -0.0121 | 1.6E-10 | -0.0078 | 1.9E-09 | -0.0089 | 7.4E-09 |
| CYTN                         | -0.0119 | 2.9E-25 | -0.0112 | 1.7E-10 | -0.0091 | 4.2E-11 | -0.0114 | 2.9E-12 |
| PD-L2                        | -0.0121 | 1.8E-24 | -0.0115 | 5.3E-10 | -0.0054 | 5.3E-05 | -0.0063 | 7.1E-05 |
| ERBB3                        | 0.0113  | 2.7E-24 | 0.0102  | 3.5E-09 | 0.0068  | 4.4E-08 | 0.0093  | 2.8E-10 |
| resistin                     | -0.0119 | 3.8E-24 | -0.0084 | 4.4E-06 | -0.0079 | 6.1E-09 | -0.0104 | 1.1E-10 |
| MPIF-1                       | -0.0119 | 5.3E-24 | -0.0112 | 1.3E-09 | -0.0058 | 3.3E-05 | -0.0082 | 5.3E-07 |
| REG4                         | -0.011  | 5.0E-23 | -0.0086 | 6.8E-07 | -0.0073 | 4.7E-05 | -0.0078 | 4.0E-04 |
| Factor B                     | 0.0105  | 6.0E-21 | 0.0108  | 1.0E-09 | 0.0081  | 6.4E-10 | 0.01    | 1.3E-10 |
| PAPP-A                       | -0.0112 | 6.7E-21 | -0.0095 | 2.0E-07 | -0.0074 | 5.8E-08 | -0.0088 | 3.7E-08 |
| IGFBP-2                      | -0.0102 | 4.0E-20 | -0.0092 | 1.4E-07 | -0.0129 | 2.0E-13 | -0.0165 | 7.1E-15 |
| WFKN2                        | -0.0107 | 2.0E-19 | -0.0101 | 8.9E-08 | -0.0093 | 9.8E-12 | -0.0114 | 1.0E-12 |
| SREC-I                       | -0.0106 | 2.5E-19 | -0.0095 | 1.8E-07 | -0.0073 | 5.5E-08 | -0.0098 | 7.9E-10 |
| Soggy-1                      | 0.0105  | 3.3E-19 | 0.0088  | 7.4E-07 | 0.0055  | 3.9E-05 | 0.0069  | 1.5E-05 |
| Afamin                       | 0.0106  | 9.4E-19 | 0.0079  | 2.0E-05 | 0.0098  | 5.9E-13 | 0.0119  | 1.6E-13 |
| Calcineurin B a              | 0.0103  | 1.4E-18 | 0.008   | 1.3E-05 | 0.0058  | 1.0E-05 | 0.0066  | 2.2E-05 |
| C34 gp41 HIV Fragment        | -0.0102 | 2.7E-18 | -0.0093 | 1.3E-07 | -0.0073 | 7.8E-08 | -0.0089 | 2.5E-08 |
| ASM3A                        | 0.0101  | 7.4E-18 | 0.0088  | 6.1E-07 | 0.0055  | 4.2E-05 | 0.0074  | 3.9E-06 |
| CD23                         | -0.0102 | 7.6E-18 | -0.0081 | 2.7E-06 | -0.0056 | 5.1E-05 | -0.006  | 2.3E-04 |
| CRDL1                        | -0.0091 | 4.0E-17 | -0.0069 | 6.8E-05 | -0.0073 | 2.4E-09 | -0.0087 | 2.0E-09 |
| Angiostatin                  | 0.0095  | 8.3E-17 | 0.0077  | 6.7E-06 | 0.0065  | 6.2E-07 | 0.0078  | 4.2E-07 |
| PLXC1                        | 0.0097  | 5.0E-16 | 0.0091  | 6.9E-07 | 0.0073  | 5.7E-08 | 0.0102  | 1.5E-10 |
| NKp46                        | -0.0095 | 1.5E-15 | -0.0079 | 4.2E-05 | -0.0054 | 8.1E-05 | -0.0063 | 9.5E-05 |
| Lysozyme                     | -0.0092 | 2.4E-15 | -0.0103 | 1.9E-08 | -0.0061 | 6.6E-06 | -0.0077 | 1.5E-06 |
| Factor H                     | 0.009   | 3.9E-15 | 0.0079  | 1.7E-05 | 0.0084  | 3.9E-11 | 0.0101  | 1.6E-11 |
| OX2G                         | -0.009  | 4.9E-14 | -0.006  | 1.7E-03 | -0.0069 | 2.3E-07 | -0.0078 | 5.0E-07 |
| cGMP-stimulated PDE          | 0.0085  | 2.9E-13 | 0.0058  | 1.2E-03 | 0.0059  | 1.5E-05 | 0.0072  | 6.9E-06 |
| N-terminal pro-BNP           | -0.0076 | 4.3E-12 | -0.0038 | 2.8E-02 | -0.0069 | 4.9E-05 | -0.0083 | 6.2E-05 |
| SPINT2                       | -0.0081 | 8.9E-12 | -0.007  | 1.1E-04 | -0.0057 | 2.6E-05 | -0.0064 | 7.7E-05 |
| Factor I                     | 0.0077  | 1.2E-11 | 0.0081  | 5.0E-06 | 0.0079  | 5.7E-10 | 0.0095  | 2.4E-10 |
| Periostin                    | -0.0077 | 1.9E-11 | -0.0049 | 5.4E-03 | -0.0082 | 9.8E-10 | -0.0096 | 1.8E-09 |
| Cathepsin A                  | 0.008   | 2.3E-11 | 0.0094  | 4.3E-07 | 0.0068  | 6.3E-07 | 0.0087  | 9.0E-08 |
| Glutathione S-transferase Pi | -0.0077 | 4.3E-11 | -0.0093 | 5.3E-08 | -0.0082 | 5.8E-10 | -0.0107 | 8.4E-12 |
| tPA                          | 0.0078  | 4.9E-11 | 0.0077  | 3.7E-05 | 0.0078  | 2.4E-09 | 0.0089  | 8.1E-09 |
| Aminoacylase-1               | 0.0075  | 5.6E-11 | 0.0062  | 4.5E-04 | 0.01    | 4.2E-14 | 0.0119  | 2.6E-14 |
| Growth hormone receptor      | 0.0072  | 1.9E-10 | 0.0053  | 2.0E-03 | 0.0115  | 3.6E-18 | 0.0141  | 3.2E-19 |
| VEGF sR2                     | 0.0071  | 2.8E-10 | 0.0077  | 2.0E-05 | 0.0063  | 2.4E-06 | 0.0085  | 4.1E-08 |



|                 |         |         |         |         |         |         |         |         |
|-----------------|---------|---------|---------|---------|---------|---------|---------|---------|
| IGF-II receptor | 0.0073  | 1.4E-09 | 0.006   | 1.5E-03 | 0.0058  | 1.8E-05 | 0.0072  | 6.3E-06 |
| OBCAM           | 0.0071  | 2.0E-09 | 0.0078  | 2.1E-05 | 0.0054  | 4.2E-05 | 0.0067  | 2.0E-05 |
| RET             | 0.0067  | 3.1E-09 | 0.0044  | 8.3E-03 | 0.0088  | 2.4E-11 | 0.0114  | 3.5E-13 |
| BMP-1           | 0.0067  | 7.8E-09 | 0.0062  | 4.3E-04 | 0.01    | 1.7E-15 | 0.0121  | 5.1E-16 |
| IDS             | 0.0069  | 7.9E-09 | 0.0055  | 3.1E-03 | -0.0053 | 4.1E-05 | -0.0048 | 1.4E-03 |
| P-Selectin      | 0.0067  | 2.2E-08 | 0.0081  | 2.4E-05 | 0.0069  | 3.0E-07 | 0.0082  | 2.5E-07 |
| LSAMP           | -0.0061 | 1.3E-07 | -0.0053 | 4.0E-03 | -0.0057 | 3.4E-06 | -0.0057 | 9.9E-05 |
| LG3BP           | 0.0061  | 1.9E-07 | 0.0089  | 1.6E-06 | 0.0107  | 2.1E-15 | 0.0127  | 1.8E-15 |
| DKK3            | -0.0058 | 3.5E-07 | -0.0056 | 1.3E-03 | -0.0066 | 7.0E-07 | -0.0076 | 8.9E-07 |
| Siglec-7        | 0.0061  | 3.7E-07 | 0.0067  | 3.6E-04 | 0.0116  | 2.2E-17 | 0.0138  | 1.3E-17 |
| GFRa-1          | -0.006  | 3.9E-07 | -0.0041 | 2.2E-02 | 0.007   | 1.1E-07 | 0.0068  | 9.8E-06 |
| EDAR            | -0.006  | 8.0E-07 | -0.0062 | 1.3E-03 | -0.0057 | 2.4E-05 | -0.0075 | 3.0E-06 |
| EMAP-2          | 0.0057  | 1.1E-06 | 0.0037  | 3.6E-02 | 0.0056  | 2.1E-05 | 0.0069  | 7.8E-06 |
| FN1.4           | 0.0052  | 3.4E-06 | 0.0036  | 4.3E-02 | 0.005   | 6.5E-05 | 0.0059  | 6.7E-05 |
| IDUA            | 0.0055  | 4.3E-06 | 0.0095  | 2.2E-07 | 0.0062  | 4.6E-06 | 0.0082  | 3.0E-07 |
| Survivin        | 0.0054  | 5.0E-06 | 0.0038  | 3.6E-02 | 0.0056  | 1.0E-05 | 0.0058  | 9.2E-05 |
| Apo E2          | 0.0051  | 7.4E-06 | 0.0053  | 3.3E-03 | 0.0071  | 1.7E-07 | 0.008   | 7.3E-07 |
| NET4            | 0.0051  | 1.2E-05 | 0.0043  | 1.8E-02 | 0.0068  | 5.3E-07 | 0.0086  | 7.1E-08 |
| PAI-1           | 0.0052  | 1.7E-05 | 0.0046  | 1.4E-02 | 0.0104  | 4.0E-14 | 0.0111  | 6.0E-12 |
| C3b             | 0.0051  | 1.7E-05 | 0.0034  | 6.2E-02 | 0.0078  | 4.7E-09 | 0.0071  | 6.9E-06 |
| Laminin         | 0.005   | 1.8E-05 | 0.0066  | 3.6E-04 | 0.0088  | 2.2E-11 | 0.009   | 6.5E-09 |
| CBPE            | 0.0049  | 3.4E-05 | 0.0019  | 2.8E-01 | -0.0054 | 8.7E-05 | -0.005  | 2.1E-03 |

*APOL1, Apolipoprotein L1 genotype*

**Table S3.** Proteins significantly associated with eGFR slope in multivariable-adjusted models in JHS and FHS

| Protein                | JHS                    |                         |                        |                          | FHS                    |                         |                        |                         | Renal AV cohort (n=22) |                        |
|------------------------|------------------------|-------------------------|------------------------|--------------------------|------------------------|-------------------------|------------------------|-------------------------|------------------------|------------------------|
|                        | eGFR slope (n = 1,371) |                         | baseline eGFR (n=1928) |                          | eGFR slope (n = 1,332) |                         | baseline eGFR (n=1621) |                         | Median V/A             | P                      |
|                        | Beta                   | P                       | Beta                   | P                        | Beta                   | P                       | Beta                   | P                       |                        |                        |
| Testican-2             | 0.38                   | 1.7 x 10 <sup>-11</sup> | 0.0198                 | 3.6 x 10 <sup>-70</sup>  | 0.44                   | 1.5 x 10 <sup>-15</sup> | 0.0099                 | 3.8 x 10 <sup>-13</sup> | 1.40                   | 1.5 x 10 <sup>-9</sup> |
| DAN                    | -0.39                  | 6.5 x 10 <sup>-11</sup> | -0.0227                | 3.1 x 10 <sup>-100</sup> | -0.41                  | 5.3 x 10 <sup>-11</sup> | -0.0096                | 3.8 x 10 <sup>-15</sup> | 0.81                   | 3.3 x 10 <sup>-6</sup> |
| FSTL3                  | -0.40                  | 1.7 x 10 <sup>-10</sup> | -0.0217                | 4.1 x 10 <sup>-97</sup>  | -0.46                  | 7.0 x 10 <sup>-14</sup> | -0.0078                | 1.0 x 10 <sup>-9</sup>  | 0.94                   | 1.4 x 10 <sup>-2</sup> |
| TNF sR-I               | -0.34                  | 1.0 x 10 <sup>-8</sup>  | -0.0226                | 3.8 x 10 <sup>-96</sup>  | -0.56                  | 7.1 x 10 <sup>-21</sup> | -0.0085                | 3.5 x 10 <sup>-11</sup> | 0.94                   | 5.9 x 10 <sup>-5</sup> |
| FGF-20                 | 0.30                   | 8.7 x 10 <sup>-8</sup>  | 0.0173                 | 1.3 x 10 <sup>-53</sup>  | 0.36                   | 3.8 x 10 <sup>-10</sup> | 0.0026                 | 4.9 x 10 <sup>-2</sup>  | 1.58                   | 1.3 x 10 <sup>-8</sup> |
| Epithelial cell kinase | -0.31                  | 1.6 x 10 <sup>-7</sup>  | -0.0205                | 5.9 x 10 <sup>-82</sup>  | -0.33                  | 2.0 x 10 <sup>-8</sup>  | -0.011                 | 4.7 x 10 <sup>-17</sup> | 0.95                   | 7.3 x 10 <sup>-2</sup> |
| IGFBP-6                | -0.35                  | 2.2 x 10 <sup>-7</sup>  | -0.0275                | 4.4 x 10 <sup>-173</sup> | -0.57                  | 2.8 x 10 <sup>-19</sup> | -0.017                 | 2.7 x 10 <sup>-44</sup> | 0.93                   | 5.7 x 10 <sup>-6</sup> |
| TNF sR-II              | -0.28                  | 4.5 x 10 <sup>-7</sup>  | -0.0208                | 6.1 x 10 <sup>-78</sup>  | -0.33                  | 1.4 x 10 <sup>-8</sup>  | -0.0067                | 3.6 x 10 <sup>-7</sup>  | 0.99                   | 7.6 x 10 <sup>-1</sup> |
| EFNB1                  | -0.26                  | 5.6 x 10 <sup>-7</sup>  | -0.0163                | 6.8 x 10 <sup>-46</sup>  | -0.40                  | 4.1 x 10 <sup>-8</sup>  | -0.0106                | 2.4 x 10 <sup>-9</sup>  | 0.96                   | 9.8 x 10 <sup>-4</sup> |
| DC-SIGNR               | 0.26                   | 1.3 x 10 <sup>-6</sup>  | 0.0115                 | 1.7 x 10 <sup>-23</sup>  | 0.37                   | 3.3 x 10 <sup>-10</sup> | 0.0048                 | 1.9 x 10 <sup>-4</sup>  | 1.03                   | 1.5 x 10 <sup>-1</sup> |
| Beta2-Microglobulin    | -0.31                  | 1.7 x 10 <sup>-6</sup>  | -0.0243                | 1.7 x 10 <sup>-130</sup> | -0.52                  | 6.8 x 10 <sup>-17</sup> | -0.0126                | 2.6 x 10 <sup>-24</sup> | 0.87                   | 1.6 x 10 <sup>-6</sup> |
| DSC2                   | -0.30                  | 1.9 x 10 <sup>-6</sup>  | -0.0248                | 1.0 x 10 <sup>-125</sup> | -0.44                  | 4.4 x 10 <sup>-9</sup>  | -0.013                 | 5.2 x 10 <sup>-14</sup> | 0.86                   | 2.3 x 10 <sup>-2</sup> |
| UNC5H3                 | -0.28                  | 2.5 x 10 <sup>-6</sup>  | -0.0218                | 2.9 x 10 <sup>-92</sup>  | -0.53                  | 1.5 x 10 <sup>-19</sup> | -0.0101                | 2.4 x 10 <sup>-14</sup> | 0.99                   | 2.6 x 10 <sup>-1</sup> |
| RELT                   | -0.31                  | 2.8 x 10 <sup>-6</sup>  | -0.0275                | 6.0 x 10 <sup>-174</sup> | -0.42                  | 3.5 x 10 <sup>-11</sup> | -0.012                 | 7.3 x 10 <sup>-23</sup> | 0.93                   | 1.4 x 10 <sup>-3</sup> |
| EFNB2                  | -0.27                  | 3.2 x 10 <sup>-6</sup>  | -0.0234                | 9.8 x 10 <sup>-102</sup> | -0.36                  | 2.6 x 10 <sup>-6</sup>  | -0.0133                | 2.0 x 10 <sup>-14</sup> | 0.97                   | 8.2 x 10 <sup>-1</sup> |
| FBLN3                  | -0.28                  | 3.2 x 10 <sup>-6</sup>  | -0.0143                | 4.3 x 10 <sup>-44</sup>  | -0.27                  | 3.5 x 10 <sup>-4</sup>  | -0.0084                | 4.1 x 10 <sup>-7</sup>  | 1.00                   | 4.0 x 10 <sup>-1</sup> |
| TIMD3                  | -0.26                  | 5.4 x 10 <sup>-6</sup>  | -0.0167                | 6.9 x 10 <sup>-52</sup>  | -0.22                  | 1.3 x 10 <sup>-4</sup>  | -0.0051                | 1.6 x 10 <sup>-4</sup>  | 1.00                   | 4.6 x 10 <sup>-1</sup> |
| ROR1                   | -0.25                  | 5.9 x 10 <sup>-6</sup>  | -0.0195                | 1.1 x 10 <sup>-66</sup>  | -0.46                  | 9.7 x 10 <sup>-10</sup> | -0.0115                | 5.7 x 10 <sup>-11</sup> | 0.99                   | 6.1 x 10 <sup>-1</sup> |
| EphB6                  | -0.25                  | 9.5 x 10 <sup>-6</sup>  | -0.022                 | 3.8 x 10 <sup>-81</sup>  | -0.52                  | 2.4 x 10 <sup>-17</sup> | -0.013                 | 8.4 x 10 <sup>-23</sup> | 0.99                   | 2.5 x 10 <sup>-1</sup> |
| TFF3                   | -0.23                  | 1.6 x 10 <sup>-5</sup>  | -0.0159                | 2.9 x 10 <sup>-47</sup>  | -0.33                  | 2.1 x 10 <sup>-8</sup>  | -0.0059                | 8.3 x 10 <sup>-6</sup>  | 0.88                   | 1.0 x 10 <sup>-8</sup> |
| DR6                    | -0.22                  | 2.9 x 10 <sup>-5</sup>  | -0.0182                | 1.4 x 10 <sup>-55</sup>  | -0.32                  | 1.8 x 10 <sup>-8</sup>  | -0.0089                | 9.1 x 10 <sup>-11</sup> | 0.98                   | 4.7 x 10 <sup>-1</sup> |

JHS: for eGFR slope analysis, linear regression model adjusted for age, sex, plate, hypertension, diabetes, BMI, *APOL1* genotype, and baseline eGFR; association with baseline eGFR adjusted for age, sex, and *APOL1* genotype.

FHS: for eGFR slope analysis, linear regression model adjusted for age, sex, hypertension, diabetes, BMI, and baseline eGFR; association with baseline eGFR adjusted for age and sex.

**Table S4.** Testican-2 and eGFR slope in multivariable-adjusted model including albuminuria in JHS and FHS

| Outcome      | JHS (n=673) |              |                        | FHS (n=1284) |              |                         |
|--------------|-------------|--------------|------------------------|--------------|--------------|-------------------------|
|              | Beta        | 95% CI       | P                      | Beta         | 95% CI       | P                       |
| eGFR decline | 0.38        | (0.22, 0.55) | 4.8 x 10 <sup>-6</sup> | 0.45         | (0.34, 0.56) | 1.1 x 10 <sup>-15</sup> |

For JHS, linear regression model adjusted for age, sex, plate, hypertension, diabetes, BMI, *APOL1* genotype, baseline eGFR, and albuminuria.  
For FHS, linear regression model adjusted for age, sex, hypertension, diabetes, BMI, baseline eGFR, and trace albuminuria.

**Table S5.** Single nucleotide variant associations with circulating testican-2 levels across JHS and FHS

| rsid       | Ref Allele | Effect Allele | Build 38 Position | Build 37 Position | Cohort | Observed Effect AF in FHS | Beta FHS | SE FHS | P FHS    | Observed Effect AF in JHS | Beta JHS | SE JHS | P JHS    | Alt AF Africans | Alt AF Europeans | Panel Source for AF |
|------------|------------|---------------|-------------------|-------------------|--------|---------------------------|----------|--------|----------|---------------------------|----------|--------|----------|-----------------|------------------|---------------------|
| rs7921668  | T          | C             | 72055026          | 73814784          | BOTH   | 0.49                      | 0.15     | 0.04   | 2.54E-05 | 0.36                      | 0.12     | 0.03   | 1.15E-04 | 0.35            | 0.48             | gnomAD              |
| rs1678626  | T          | C             | 72066577          | 73826335          | BOTH   | 0.54                      | 0.16     | 0.04   | 3.64E-06 | 0.37                      | 0.14     | 0.03   | 2.27E-05 | 0.35            | 0.52             | 1000G               |
| rs1678627  | C          | T             | 72068990          | 73828748          | BOTH   | 0.40                      | 0.17     | 0.04   | 9.83E-06 | 0.20                      | 0.19     | 0.04   | 1.53E-06 | 0.19            | 0.39             | gnomAD              |
| rs1678628  | G          | A             | 72069096          | 73828854          | BOTH   | 0.41                      | 0.17     | 0.04   | 1.04E-05 | 0.20                      | 0.19     | 0.04   | 1.66E-06 | 0.19            | 0.39             | gnomAD              |
| rs1245564  | C          | T             | 72077109          | 73836867          | BOTH   | 0.51                      | 0.20     | 0.04   | 4.20E-08 | 0.55                      | 0.11     | 0.03   | 4.27E-04 | 0.54            | 0.51             | gnomAD              |
| rs1245563  | C          | T             | 72077194          | 73836952          | BOTH   | 0.56                      | 0.18     | 0.04   | 3.37E-07 | 0.56                      | 0.11     | 0.03   | 6.88E-04 | 0.55            | 0.55             | gnomAD              |
| rs1245560  | A          | C             | 72077662          | 73837420          | BOTH   | 0.51                      | 0.20     | 0.04   | 3.91E-08 | 0.55                      | 0.11     | 0.03   | 5.70E-04 | 0.54            | 0.51             | gnomAD              |
| rs1245559  | G          | A             | 72078506          | 73838264          | BOTH   | 0.52                      | 0.22     | 0.04   | 7.15E-09 | 0.61                      | 0.17     | 0.03   | 4.74E-08 | 0.62            | 0.52             | gnomAD              |
| rs1245553  | T          | C             | 72083700          | 73843458          | BOTH   | 0.45                      | 0.24     | 0.04   | 3.93E-10 | 0.40                      | 0.13     | 0.03   | 6.02E-05 | 0.41            | 0.45             | gnomAD              |
| rs1245549  | G          | A             | 72085663          | 73845421          | BOTH   | 0.39                      | 0.22     | 0.04   | 1.89E-08 | 0.32                      | 0.16     | 0.03   | 1.96E-06 | 0.31            | 0.39             | gnomAD              |
| rs1245545  | C          | T             | 72087596          | 73847354          | BOTH   | 0.39                      | 0.22     | 0.04   | 1.89E-08 | 0.32                      | 0.16     | 0.03   | 2.37E-06 | 0.31            | 0.39             | gnomAD              |
| rs1245543  | C          | T             | 72089714          | 73849472          | BOTH   | 0.39                      | 0.22     | 0.04   | 1.89E-08 | 0.33                      | 0.15     | 0.03   | 4.26E-06 | 0.32            | 0.39             | gnomAD              |
| rs1245542  | T          | G             | 72089773          | 73849531          | BOTH   | 0.42                      | 0.24     | 0.04   | 7.21E-09 | 0.33                      | 0.15     | 0.03   | 3.67E-06 | 0.32            | 0.39             | gnomAD              |
| rs1245541  | G          | A             | 72089881          | 73849639          | BOTH   | 0.39                      | 0.22     | 0.04   | 1.90E-08 | 0.33                      | 0.15     | 0.03   | 3.67E-06 | 0.32            | 0.39             | gnomAD              |
| rs1245539  | G          | A             | 72091069          | 73850827          | BOTH   | 0.39                      | 0.22     | 0.04   | 1.93E-08 | 0.33                      | 0.15     | 0.03   | 2.72E-06 | 0.31            | 0.39             | gnomAD              |
| rs1245538  | G          | A             | 72091083          | 73850841          | BOTH   | 0.39                      | 0.22     | 0.04   | 1.93E-08 | 0.33                      | 0.15     | 0.03   | 3.67E-06 | 0.31            | 0.39             | gnomAD              |
| rs1245537  | C          | A             | 72091502          | 73851260          | BOTH   | 0.39                      | 0.22     | 0.04   | 1.91E-08 | 0.33                      | 0.15     | 0.03   | 3.67E-06 | 0.32            | 0.39             | gnomAD              |
| rs1245536  | T          | C             | 72091640          | 73851398          | BOTH   | 0.39                      | 0.22     | 0.04   | 1.91E-08 | 0.33                      | 0.15     | 0.03   | 3.67E-06 | 0.32            | 0.39             | gnomAD              |
| rs7893890  | A          | G             | 72092167          | 73851925          | BOTH   | 0.39                      | 0.22     | 0.04   | 1.91E-08 | 0.33                      | 0.15     | 0.03   | 3.67E-06 | 0.32            | 0.39             | gnomAD              |
| rs7087178  | T          | G             | 72092597          | 73852355          | BOTH   | 0.39                      | 0.22     | 0.04   | 1.91E-08 | 0.33                      | 0.15     | 0.03   | 3.67E-06 | 0.32            | 0.39             | gnomAD              |
| rs7087475  | T          | A             | 72092798          | 73852556          | BOTH   | 0.39                      | 0.22     | 0.04   | 1.92E-08 | 0.33                      | 0.15     | 0.03   | 3.67E-06 | 0.32            | 0.39             | gnomAD              |
| rs12766266 | C          | T             | 72093720          | 73853478          | BOTH   | 0.44                      | 0.22     | 0.04   | 2.40E-07 | 0.32                      | 0.16     | 0.03   | 1.39E-06 | 0.31            | 0.42             | gnomAD              |
| rs2394851  | A          | C             | 72093897          | 73853655          | BOTH   | 0.39                      | 0.22     | 0.04   | 1.92E-08 | 0.33                      | 0.15     | 0.03   | 4.26E-06 | 0.32            | 0.39             | gnomAD              |
| rs3312     | A          | G             | 72097226          | 73856984          | BOTH   | 0.45                      | 0.24     | 0.04   | 3.12E-10 | 0.62                      | 0.12     | 0.03   | 8.09E-05 | 0.64            | 0.46             | gnomAD              |
| rs1668155  | T          | C             | 72098381          | 73858139          | BOTH   | 0.49                      | 0.22     | 0.04   | 6.21E-10 | 0.68                      | 0.18     | 0.03   | 4.83E-08 | 0.69            | 0.48             | gnomAD              |
| rs1668154  | C          | T             | 72102274          | 73862032          | BOTH   | 0.43                      | 0.20     | 0.04   | 2.43E-08 | 0.22                      | 0.15     | 0.04   | 5.58E-05 | 0.22            | 0.42             | gnomAD              |
| rs7090800  | T          | C             | 72105973          | 73865731          | BOTH   | 0.49                      | 0.22     | 0.03   | 6.83E-10 | 0.68                      | 0.17     | 0.03   | 1.95E-07 | 0.69            | 0.48             | gnomAD              |
| rs921361   | C          | T             | 72107696          | 73867454          | BOTH   | 0.39                      | 0.21     | 0.04   | 1.67E-08 | 0.21                      | 0.16     | 0.04   | 2.12E-05 | 0.21            | 0.39             | gnomAD              |
| rs1678614  | G          | A             | 72115304          | 73875062          | BOTH   | 0.44                      | 0.20     | 0.04   | 2.55E-08 | 0.21                      | 0.14     | 0.04   | 5.03E-04 | 0.20            | 0.42             | gnomAD              |
| rs3780948  | A          | G             | 72126548          | 73886306          | BOTH   | 0.40                      | 0.21     | 0.04   | 1.68E-07 | 0.21                      | 0.14     | 0.04   | 5.03E-04 | 0.20            | 0.41             | gnomAD              |
| rs12784395 | G          | A             | 72131391          | 73891149          | BOTH   | 0.47                      | 0.20     | 0.04   | 1.24E-07 | 0.21                      | 0.14     | 0.04   | 3.33E-04 | 0.21            | 0.45             | gnomAD              |
| rs2894177  | T          | C             | 72136298          | 73896056          | BOTH   | 0.44                      | 0.20     | 0.04   | 4.44E-08 | 0.21                      | 0.13     | 0.04   | 5.60E-04 | 0.20            | 0.41             | gnomAD              |
| rs7086521  | C          | T             | 72138664          | 73898422          | BOTH   | 0.48                      | 0.20     | 0.04   | 9.45E-08 | 0.25                      | 0.17     | 0.04   | 4.00E-06 | 0.25            | 0.48             | gnomAD              |
| rs7070702  | A          | C             | 72147872          | 73907630          | BOTH   | 0.42                      | 0.22     | 0.04   | 7.16E-09 | 0.26                      | 0.15     | 0.04   | 3.06E-05 | 0.26            | 0.39             | gnomAD              |
| rs11000201 | T          | G             | 72171806          | 73931564          | BOTH   | 0.52                      | 0.14     | 0.04   | 3.66E-05 | 0.22                      | 0.14     | 0.04   | 3.63E-04 | 0.23            | 0.48             | gnomAD              |

|            |   |   |          |          |     |      |       |      |          |  |  |  |  |      |      |        |
|------------|---|---|----------|----------|-----|------|-------|------|----------|--|--|--|--|------|------|--------|
| rs10762498 | T | C | 71972907 | 73732665 | FHS | 0.58 | 0.12  | 0.04 | 4.92E-04 |  |  |  |  | 0.73 | 0.58 | gnomAD |
| rs4148926  | G | C | 71977366 | 73737124 | FHS | 0.57 | 0.12  | 0.04 | 6.83E-04 |  |  |  |  | 0.38 | 0.58 | gnomAD |
| rs12258400 | T | C | 71978155 | 73737913 | FHS | 0.57 | 0.12  | 0.04 | 6.26E-04 |  |  |  |  | 0.40 | 0.58 | gnomAD |
| rs11000123 | T | C | 71978651 | 73738409 | FHS | 0.58 | 0.12  | 0.04 | 4.40E-04 |  |  |  |  | 0.81 | 0.58 | gnomAD |
| rs4148928  | G | A | 71980855 | 73740613 | FHS | 0.57 | 0.12  | 0.04 | 6.33E-04 |  |  |  |  | 0.36 | 0.58 | gnomAD |
| rs4148929  | A | C | 71981079 | 73740837 | FHS | 0.57 | 0.12  | 0.04 | 6.36E-04 |  |  |  |  | 0.43 | 0.58 | gnomAD |
| rs2091331  | A | G | 71981948 | 73741706 | FHS | 0.58 | 0.12  | 0.04 | 4.28E-04 |  |  |  |  | 0.81 | 0.58 | gnomAD |
| rs2091332  | T | C | 71982201 | 73741959 | FHS | 0.58 | 0.12  | 0.04 | 4.49E-04 |  |  |  |  | 0.43 | 0.58 | gnomAD |
| rs2127358  | A | G | 71982522 | 73742280 | FHS | 0.47 | 0.12  | 0.04 | 9.53E-04 |  |  |  |  | 0.24 | 0.47 | gnomAD |
| rs10400065 | G | A | 71984360 | 73744118 | FHS | 0.57 | 0.13  | 0.04 | 3.72E-04 |  |  |  |  | 0.31 | 0.58 | gnomAD |
| rs10400064 | C | T | 71984424 | 73744182 | FHS | 0.48 | 0.12  | 0.04 | 7.89E-04 |  |  |  |  | 0.66 | 0.47 | gnomAD |
| rs2394847  | C | T | 71984712 | 73744470 | FHS | 0.58 | 0.13  | 0.04 | 3.11E-04 |  |  |  |  | 0.79 | 0.58 | gnomAD |
| rs4746103  | C | G | 71985190 | 73744948 | FHS | 0.58 | 0.13  | 0.04 | 2.54E-04 |  |  |  |  | 0.48 | 0.58 | gnomAD |
| rs4746104  | T | C | 71985229 | 73744987 | FHS | 0.58 | 0.13  | 0.04 | 3.40E-04 |  |  |  |  | 0.39 | 0.58 | gnomAD |
| rs4746105  | T | C | 71985241 | 73744999 | FHS | 0.47 | 0.12  | 0.04 | 6.87E-04 |  |  |  |  | 0.14 | 0.47 | gnomAD |
| rs1006974  | C | T | 71985718 | 73745476 | FHS | 0.58 | 0.13  | 0.04 | 3.10E-04 |  |  |  |  | 0.42 | 0.58 | gnomAD |
| rs2127357  | C | T | 71985841 | 73745599 | FHS | 0.58 | 0.13  | 0.04 | 2.81E-04 |  |  |  |  | 0.70 | 0.58 | gnomAD |
| rs11000125 | G | C | 71987630 | 73747388 | FHS | 0.57 | 0.13  | 0.04 | 2.10E-04 |  |  |  |  | 0.78 | 0.58 | gnomAD |
| rs4747229  | C | T | 71987833 | 73747591 | FHS | 0.48 | 0.12  | 0.04 | 6.05E-04 |  |  |  |  | 0.24 | 0.47 | gnomAD |
| rs2394848  | G | A | 71990315 | 73750073 | FHS | 0.47 | 0.12  | 0.04 | 4.39E-04 |  |  |  |  | 0.14 | 0.47 | gnomAD |
| rs2394849  | T | C | 71990703 | 73750461 | FHS | 0.57 | 0.13  | 0.04 | 2.20E-04 |  |  |  |  | 0.70 | 0.58 | gnomAD |
| rs1007242  | A | G | 71991385 | 73751143 | FHS | 0.47 | 0.12  | 0.04 | 4.19E-04 |  |  |  |  | 0.14 | 0.47 | gnomAD |
| rs4747230  | A | G | 71992107 | 73751865 | FHS | 0.47 | 0.13  | 0.04 | 2.99E-04 |  |  |  |  | 0.14 | 0.47 | gnomAD |
| rs4747231  | A | G | 71992247 | 73752005 | FHS | 0.57 | 0.14  | 0.04 | 1.04E-04 |  |  |  |  | 0.79 | 0.58 | gnomAD |
| N/A        | R | I | N/A      | 73752561 | FHS | 0.36 | 0.17  | 0.04 | 1.86E-04 |  |  |  |  | N/A  | N/A  | N/A    |
| N/A        | R | I | N/A      | 73752585 | FHS | 0.30 | 0.19  | 0.05 | 2.45E-04 |  |  |  |  | N/A  | N/A  | N/A    |
| N/A        | D | R | N/A      | 73780524 | FHS | 0.48 | -0.14 | 0.04 | 2.48E-04 |  |  |  |  | N/A  | N/A  | N/A    |
| N/A        | R | I | N/A      | 73788704 | FHS | 0.49 | 0.15  | 0.04 | 3.15E-05 |  |  |  |  | N/A  | N/A  | N/A    |
| N/A        | R | D | N/A      | 73790943 | FHS | 0.47 | 0.16  | 0.04 | 2.51E-05 |  |  |  |  | N/A  | N/A  | N/A    |
| N/A        | R | D | N/A      | 73790946 | FHS | 0.42 | 0.16  | 0.04 | 8.80E-05 |  |  |  |  | N/A  | N/A  | N/A    |
| N/A        | R | D | N/A      | 73790947 | FHS | 0.44 | 0.16  | 0.04 | 4.58E-05 |  |  |  |  | N/A  | N/A  | N/A    |
| N/A        | R | I | N/A      | 73811262 | FHS | 0.49 | 0.14  | 0.04 | 4.50E-05 |  |  |  |  | N/A  | N/A  | N/A    |
| N/A        | R | D | N/A      | 73848105 | FHS | 0.45 | 0.25  | 0.04 | 2.27E-10 |  |  |  |  | N/A  | N/A  | N/A    |
| N/A        | R | D | N/A      | 73850718 | FHS | 0.34 | 0.23  | 0.04 | 2.95E-07 |  |  |  |  | N/A  | N/A  | N/A    |
| N/A        | D | R | N/A      | 73955320 | FHS | 0.46 | -0.18 | 0.04 | 1.98E-06 |  |  |  |  | N/A  | N/A  | N/A    |
| N/A        | R | D | N/A      | 73982177 | FHS | 0.53 | 0.16  | 0.04 | 2.61E-05 |  |  |  |  | N/A  | N/A  | N/A    |
| N/A        | R | D | N/A      | 74022900 | FHS | 0.36 | -0.16 | 0.04 | 1.01E-04 |  |  |  |  | N/A  | N/A  | N/A    |
| N/A        | R | D | N/A      | 74027086 | FHS | 0.36 | -0.14 | 0.04 | 2.60E-04 |  |  |  |  | N/A  | N/A  | N/A    |
| N/A        | R | D | N/A      | 74031940 | FHS | 0.30 | -0.17 | 0.04 | 1.11E-04 |  |  |  |  | N/A  | N/A  | N/A    |
| N/A        | R | D | N/A      | 74031941 | FHS | 0.31 | -0.16 | 0.04 | 9.78E-05 |  |  |  |  | N/A  | N/A  | N/A    |
| N/A        | R | D | N/A      | 74031945 | FHS | 0.31 | -0.16 | 0.04 | 9.71E-05 |  |  |  |  | N/A  | N/A  | N/A    |

|            |   |   |          |          |     |      |      |      |          |  |  |  |  |      |      |        |
|------------|---|---|----------|----------|-----|------|------|------|----------|--|--|--|--|------|------|--------|
| rs74932382 | T | C | 71992820 | 73752578 | FHS | 0.30 | 0.18 | 0.05 | 3.47E-04 |  |  |  |  | 0.14 | 0.46 | gnomAD |
| rs75113217 | T | C | 71992821 | 73752579 | FHS | 0.29 | 0.18 | 0.05 | 5.69E-04 |  |  |  |  | 0.14 | 0.46 | gnomAD |
| rs57500368 | G | A | 71992822 | 73752580 | FHS | 0.29 | 0.18 | 0.05 | 4.66E-04 |  |  |  |  | 0.17 | 0.46 | gnomAD |
| rs12413786 | G | A | 71995163 | 73754921 | FHS | 0.47 | 0.13 | 0.04 | 2.71E-04 |  |  |  |  | 0.14 | 0.47 | gnomAD |
| rs7085958  | G | A | 71996020 | 73755778 | FHS | 0.58 | 0.13 | 0.04 | 1.69E-04 |  |  |  |  | 0.34 | 0.58 | gnomAD |
| rs6480591  | G | A | 71998010 | 73757768 | FHS | 0.58 | 0.14 | 0.04 | 9.32E-05 |  |  |  |  | 0.79 | 0.58 | gnomAD |
| rs4148930  | G | C | 71998334 | 73758092 | FHS | 0.58 | 0.14 | 0.04 | 9.28E-05 |  |  |  |  | 0.81 | 0.58 | gnomAD |
| rs730334   | C | T | 71998574 | 73758332 | FHS | 0.57 | 0.13 | 0.04 | 3.33E-04 |  |  |  |  | 0.19 | 0.57 | gnomAD |
| rs4148932  | T | C | 72000036 | 73759794 | FHS | 0.59 | 0.14 | 0.04 | 8.83E-05 |  |  |  |  | 0.38 | 0.58 | gnomAD |
| rs4148933  | T | C | 72000132 | 73759890 | FHS | 0.58 | 0.14 | 0.04 | 9.20E-05 |  |  |  |  | 0.39 | 0.58 | gnomAD |
| rs7907616  | A | G | 72000418 | 73760176 | FHS | 0.58 | 0.14 | 0.04 | 5.13E-05 |  |  |  |  | 0.78 | 0.58 | gnomAD |
| rs751450   | A | G | 72001257 | 73761015 | FHS | 0.59 | 0.15 | 0.04 | 2.55E-05 |  |  |  |  | 0.87 | 0.58 | gnomAD |
| rs4148936  | A | T | 72002298 | 73762056 | FHS | 0.48 | 0.13 | 0.04 | 1.21E-04 |  |  |  |  | 0.39 | 0.47 | gnomAD |
| rs4148937  | C | T | 72002421 | 73762179 | FHS | 0.45 | 0.12 | 0.04 | 8.34E-04 |  |  |  |  | 0.09 | 0.44 | gnomAD |
| rs4148938  | C | G | 72002430 | 73762188 | FHS | 0.45 | 0.12 | 0.04 | 8.07E-04 |  |  |  |  | 0.09 | 0.44 | gnomAD |
| rs4148939  | C | T | 72002904 | 73762662 | FHS | 0.45 | 0.12 | 0.04 | 8.00E-04 |  |  |  |  | 0.09 | 0.45 | gnomAD |
| rs2219837  | T | C | 72002915 | 73762673 | FHS | 0.59 | 0.15 | 0.04 | 2.39E-05 |  |  |  |  | 0.87 | 0.58 | gnomAD |
| rs7097834  | G | T | 72003270 | 73763028 | FHS | 0.48 | 0.13 | 0.04 | 2.63E-04 |  |  |  |  | 0.18 | 0.47 | gnomAD |
| rs6480592  | C | T | 72004751 | 73764509 | FHS | 0.59 | 0.15 | 0.04 | 1.90E-05 |  |  |  |  | 0.87 | 0.58 | gnomAD |
| rs4600132  | G | A | 72005021 | 73764779 | FHS | 0.48 | 0.14 | 0.04 | 9.19E-05 |  |  |  |  | 0.37 | 0.47 | gnomAD |
| rs4747234  | C | G | 72005301 | 73765059 | FHS | 0.47 | 0.14 | 0.04 | 1.31E-04 |  |  |  |  | 0.21 | 0.47 | gnomAD |
| rs4747235  | T | C | 72005455 | 73765213 | FHS | 0.48 | 0.13 | 0.04 | 2.09E-04 |  |  |  |  | 0.24 | 0.47 | gnomAD |
| rs11000129 | T | G | 72006015 | 73765773 | FHS | 0.48 | 0.13 | 0.04 | 2.26E-04 |  |  |  |  | 0.24 | 0.47 | gnomAD |
| rs4148940  | A | G | 72006237 | 73765995 | FHS | 0.49 | 0.13 | 0.04 | 1.36E-04 |  |  |  |  | 0.44 | 0.47 | gnomAD |
| rs3740129  | G | A | 72008101 | 73767859 | FHS | 0.42 | 0.13 | 0.04 | 7.54E-04 |  |  |  |  | 0.28 | 0.41 | gnomAD |
| rs4148941  | C | A | 72009234 | 73768992 | FHS | 0.58 | 0.14 | 0.04 | 3.96E-05 |  |  |  |  | 0.87 | 0.58 | gnomAD |
| rs4148943  | C | T | 72009749 | 73769507 | FHS | 0.47 | 0.14 | 0.04 | 8.38E-05 |  |  |  |  | 0.43 | 0.47 | gnomAD |
| rs4148945  | C | T | 72009832 | 73769590 | FHS | 0.47 | 0.13 | 0.04 | 1.95E-04 |  |  |  |  | 0.14 | 0.46 | gnomAD |
| rs4148946  | C | T | 72010315 | 73770073 | FHS | 0.58 | 0.14 | 0.03 | 4.46E-05 |  |  |  |  | 0.77 | 0.58 | gnomAD |
| rs4148947  | T | C | 72010359 | 73770117 | FHS | 0.47 | 0.13 | 0.04 | 1.92E-04 |  |  |  |  | 0.29 | 0.47 | gnomAD |
| rs4148948  | A | G | 72010820 | 73770578 | FHS | 0.58 | 0.14 | 0.03 | 4.96E-05 |  |  |  |  | 0.78 | 0.57 | 1000G  |
| rs4148949  | T | C | 72010893 | 73770651 | FHS | 0.58 | 0.14 | 0.03 | 5.00E-05 |  |  |  |  | 0.82 | 0.58 | gnomAD |
| rs4148950  | G | A | 72011948 | 73771706 | FHS | 0.47 | 0.13 | 0.04 | 1.88E-04 |  |  |  |  | 0.29 | 0.47 | gnomAD |
| rs1871450  | G | A | 72012256 | 73772014 | FHS | 0.47 | 0.13 | 0.04 | 1.87E-04 |  |  |  |  | 0.29 | 0.47 | gnomAD |
| rs1871451  | G | T | 72012403 | 73772161 | FHS | 0.57 | 0.14 | 0.04 | 5.56E-05 |  |  |  |  | 0.87 | 0.58 | gnomAD |
| rs731027   | T | C | 72012578 | 73772336 | FHS | 0.47 | 0.14 | 0.04 | 8.09E-05 |  |  |  |  | 0.43 | 0.47 | gnomAD |
| rs1871452  | T | A | 72012903 | 73772661 | FHS | 0.58 | 0.14 | 0.03 | 4.82E-05 |  |  |  |  | 0.82 | 0.58 | gnomAD |
| rs730720   | C | T | 72013004 | 73772762 | FHS | 0.47 | 0.14 | 0.04 | 7.94E-05 |  |  |  |  | 0.43 | 0.47 | gnomAD |
| rs12418    | G | A | 72013256 | 73773014 | FHS | 0.47 | 0.13 | 0.04 | 1.80E-04 |  |  |  |  | 0.29 | 0.47 | gnomAD |
| rs10823898 | G | T | 72013641 | 73773399 | FHS | 0.47 | 0.13 | 0.04 | 1.69E-04 |  |  |  |  | 0.09 | 0.46 | gnomAD |
| rs896078   | G | T | 72015701 | 73775459 | FHS | 0.47 | 0.14 | 0.04 | 6.52E-05 |  |  |  |  | 0.26 | 0.47 | gnomAD |

|            |   |   |          |          |     |      |       |      |          |  |  |  |  |      |      |        |
|------------|---|---|----------|----------|-----|------|-------|------|----------|--|--|--|--|------|------|--------|
| rs896077   | C | T | 72015845 | 73775603 | FHS | 0.47 | 0.14  | 0.04 | 1.47E-04 |  |  |  |  | 0.14 | 0.47 | gnomAD |
| rs896076   | A | G | 72015949 | 73775707 | FHS | 0.47 | 0.14  | 0.04 | 1.17E-04 |  |  |  |  | 0.14 | 0.47 | gnomAD |
| rs1245586  | C | T | 72016593 | 73776351 | FHS | 0.47 | 0.14  | 0.04 | 6.40E-05 |  |  |  |  | 0.26 | 0.47 | gnomAD |
| rs1245585  | G | T | 72016717 | 73776475 | FHS | 0.48 | 0.14  | 0.04 | 6.27E-05 |  |  |  |  | 0.32 | 0.47 | gnomAD |
| rs1245584  | C | A | 72017185 | 73776943 | FHS | 0.47 | 0.14  | 0.04 | 1.44E-04 |  |  |  |  | 0.14 | 0.47 | gnomAD |
| rs1245583  | T | A | 72017934 | 73777692 | FHS | 0.47 | 0.14  | 0.04 | 1.38E-04 |  |  |  |  | 0.16 | 0.46 | gnomAD |
| rs1245582  | C | T | 72018509 | 73778267 | FHS | 0.58 | 0.14  | 0.03 | 4.10E-05 |  |  |  |  | 0.88 | 0.58 | gnomAD |
| rs1245581  | G | C | 72018849 | 73778607 | FHS | 0.47 | 0.14  | 0.04 | 1.37E-04 |  |  |  |  | 0.24 | 0.47 | gnomAD |
| rs1261886  | G | A | 72018882 | 73778640 | FHS | 0.48 | 0.14  | 0.04 | 8.32E-05 |  |  |  |  | 0.45 | 0.48 | gnomAD |
| rs1245580  | A | G | 72020736 | 73780494 | FHS | 0.58 | 0.14  | 0.04 | 3.95E-05 |  |  |  |  | 0.85 | 0.58 | gnomAD |
| rs1668163  | G | T | 72021828 | 73781586 | FHS | 0.46 | 0.14  | 0.04 | 9.84E-05 |  |  |  |  | 0.14 | 0.47 | gnomAD |
| rs11000138 | A | T | 72022264 | 73782022 | FHS | 0.41 | -0.16 | 0.04 | 9.62E-06 |  |  |  |  | 0.18 | 0.40 | gnomAD |
| rs7895905  | G | A | 72022478 | 73782236 | FHS | 0.58 | 0.15  | 0.04 | 2.90E-05 |  |  |  |  | 0.85 | 0.58 | gnomAD |
| rs10823899 | C | A | 72022507 | 73782265 | FHS | 0.47 | 0.14  | 0.04 | 9.31E-05 |  |  |  |  | 0.24 | 0.47 | gnomAD |
| rs1245517  | C | T | 72023667 | 73783425 | FHS | 0.47 | 0.14  | 0.04 | 9.62E-05 |  |  |  |  | 0.14 | 0.46 | gnomAD |
| rs1245518  | C | G | 72024267 | 73784025 | FHS | 0.59 | 0.15  | 0.04 | 2.39E-05 |  |  |  |  | 0.89 | 0.59 | gnomAD |
| rs1245519  | T | C | 72025033 | 73784791 | FHS | 0.48 | 0.14  | 0.04 | 7.11E-05 |  |  |  |  | 0.25 | 0.47 | gnomAD |
| rs1245520  | C | A | 72025418 | 73785176 | FHS | 0.48 | 0.14  | 0.04 | 7.05E-05 |  |  |  |  | 0.28 | 0.47 | gnomAD |
| rs1245521  | C | T | 72025968 | 73785726 | FHS | 0.48 | 0.15  | 0.04 | 6.89E-05 |  |  |  |  | 0.14 | 0.47 | gnomAD |
| rs1245522  | C | G | 72026383 | 73786141 | FHS | 0.48 | 0.15  | 0.04 | 6.82E-05 |  |  |  |  | 0.29 | 0.47 | gnomAD |
| rs1245523  | A | G | 72027139 | 73786897 | FHS | 0.48 | 0.15  | 0.04 | 2.57E-05 |  |  |  |  | 0.43 | 0.48 | gnomAD |
| rs1245524  | A | G | 72027844 | 73787602 | FHS | 0.59 | 0.15  | 0.04 | 1.97E-05 |  |  |  |  | 0.88 | 0.59 | gnomAD |
| rs1245525  | A | G | 72028396 | 73788154 | FHS | 0.45 | 0.16  | 0.04 | 3.70E-05 |  |  |  |  | 0.37 | 0.46 | gnomAD |
| rs1271934  | A | G | 72028775 | 73788533 | FHS | 0.59 | 0.16  | 0.04 | 1.66E-05 |  |  |  |  | 0.88 | 0.59 | gnomAD |
| rs12268174 | T | G | 72028935 | 73788693 | FHS | 0.48 | 0.15  | 0.04 | 4.35E-05 |  |  |  |  | 0.33 | 0.48 | gnomAD |
| rs1245535  | C | G | 72029275 | 73789033 | FHS | 0.58 | 0.15  | 0.04 | 3.26E-05 |  |  |  |  | 0.89 | 0.59 | gnomAD |
| rs877620   | C | T | 72029449 | 73789207 | FHS | 0.48 | 0.15  | 0.04 | 3.07E-05 |  |  |  |  | 0.25 | 0.47 | gnomAD |
| rs1245533  | G | T | 72030368 | 73790126 | FHS | 0.49 | 0.16  | 0.04 | 1.77E-05 |  |  |  |  | 0.42 | 0.48 | gnomAD |
| rs1245532  | G | A | 72031016 | 73790774 | FHS | 0.50 | 0.16  | 0.04 | 8.46E-06 |  |  |  |  | 0.70 | 0.48 | gnomAD |
| rs1245531  | G | A | 72031061 | 73790819 | FHS | 0.48 | 0.16  | 0.04 | 1.52E-05 |  |  |  |  | 0.34 | 0.47 | gnomAD |
| rs1245530  | C | T | 72032510 | 73792268 | FHS | 0.48 | 0.15  | 0.04 | 4.87E-05 |  |  |  |  | 0.10 | 0.47 | gnomAD |
| rs1245529  | T | C | 72032678 | 73792436 | FHS | 0.48 | 0.15  | 0.04 | 4.79E-05 |  |  |  |  | 0.13 | 0.47 | gnomAD |
| rs1245528  | G | T | 72034988 | 73794746 | FHS | 0.47 | 0.15  | 0.04 | 4.18E-05 |  |  |  |  | 0.09 | 0.47 | gnomAD |
| rs1245527  | G | C | 72036394 | 73796152 | FHS | 0.58 | 0.16  | 0.04 | 1.48E-05 |  |  |  |  | 0.85 | 0.57 | gnomAD |
| rs1245526  | C | T | 72037499 | 73797257 | FHS | 0.46 | 0.14  | 0.04 | 1.73E-04 |  |  |  |  | 0.09 | 0.45 | gnomAD |
| rs1271351  | C | T | 72039115 | 73798873 | FHS | 0.57 | 0.17  | 0.04 | 5.16E-06 |  |  |  |  | 0.86 | 0.57 | gnomAD |
| rs1245507  | G | A | 72039591 | 73799349 | FHS | 0.50 | 0.15  | 0.04 | 1.67E-05 |  |  |  |  | 0.20 | 0.48 | gnomAD |
| rs1245508  | G | A | 72039964 | 73799722 | FHS | 0.50 | 0.15  | 0.04 | 3.35E-05 |  |  |  |  | 0.27 | 0.48 | gnomAD |
| rs1245509  | T | C | 72040064 | 73799822 | FHS | 0.51 | 0.16  | 0.04 | 7.27E-06 |  |  |  |  | 0.70 | 0.50 | gnomAD |
| rs1245510  | G | A | 72040201 | 73799959 | FHS | 0.51 | 0.16  | 0.04 | 7.23E-06 |  |  |  |  | 0.67 | 0.50 | gnomAD |
| rs1245511  | G | T | 72041113 | 73800871 | FHS | 0.49 | 0.15  | 0.04 | 2.84E-05 |  |  |  |  | 0.28 | 0.48 | gnomAD |

|            |   |   |          |          |     |      |       |      |          |  |  |  |  |      |      |        |
|------------|---|---|----------|----------|-----|------|-------|------|----------|--|--|--|--|------|------|--------|
| rs1245512  | G | A | 72042129 | 73801887 | FHS | 0.58 | 0.17  | 0.04 | 2.06E-06 |  |  |  |  | 0.84 | 0.59 | gnomAD |
| rs1245513  | G | A | 72042499 | 73802257 | FHS | 0.50 | 0.15  | 0.04 | 2.31E-05 |  |  |  |  | 0.20 | 0.48 | gnomAD |
| rs1269600  | T | C | 72043117 | 73802875 | FHS | 0.59 | 0.17  | 0.04 | 2.19E-06 |  |  |  |  | 0.85 | 0.59 | gnomAD |
| rs1245514  | C | T | 72043277 | 73803035 | FHS | 0.50 | 0.15  | 0.04 | 1.49E-05 |  |  |  |  | 0.21 | 0.48 | gnomAD |
| rs1630642  | C | T | 72044862 | 73804620 | FHS | 0.49 | 0.15  | 0.04 | 2.71E-05 |  |  |  |  | 0.22 | 0.48 | gnomAD |
| rs1668158  | A | G | 72044884 | 73804642 | FHS | 0.59 | 0.17  | 0.04 | 1.41E-06 |  |  |  |  | 0.85 | 0.59 | gnomAD |
| rs11591794 | G | A | 72044940 | 73804698 | FHS | 0.08 | -0.40 | 0.11 | 2.67E-04 |  |  |  |  | 0.01 | 0.09 | gnomAD |
| rs1632171  | G | T | 72045003 | 73804761 | FHS | 0.49 | 0.16  | 0.04 | 1.15E-05 |  |  |  |  | 0.52 | 0.49 | gnomAD |
| rs1612028  | C | G | 72045532 | 73805290 | FHS | 0.49 | 0.15  | 0.04 | 2.30E-05 |  |  |  |  | 0.25 | 0.48 | gnomAD |
| rs1678617  | T | C | 72045998 | 73805756 | FHS | 0.05 | 0.53  | 0.16 | 9.14E-04 |  |  |  |  | 0.01 | 0.05 | gnomAD |
| rs1668159  | G | T | 72046054 | 73805812 | FHS | 0.59 | 0.17  | 0.04 | 1.16E-06 |  |  |  |  | 0.85 | 0.59 | gnomAD |
| rs1678618  | A | G | 72046530 | 73806288 | FHS | 0.49 | 0.15  | 0.04 | 2.33E-05 |  |  |  |  | 0.25 | 0.48 | gnomAD |
| rs1668160  | T | C | 72046812 | 73806570 | FHS | 0.59 | 0.17  | 0.04 | 1.09E-06 |  |  |  |  | 0.85 | 0.59 | gnomAD |
| rs1668161  | C | A | 72047030 | 73806788 | FHS | 0.59 | 0.17  | 0.04 | 1.12E-06 |  |  |  |  | 0.85 | 0.59 | gnomAD |
| rs1678619  | T | C | 72047151 | 73806909 | FHS | 0.58 | 0.17  | 0.04 | 1.16E-06 |  |  |  |  | 0.85 | 0.59 | gnomAD |
| rs7913636  | T | C | 72047656 | 73807414 | FHS | 0.58 | 0.17  | 0.04 | 2.59E-06 |  |  |  |  | 0.69 | 0.58 | gnomAD |
| rs10823901 | C | T | 72047767 | 73807525 | FHS | 0.49 | 0.15  | 0.04 | 2.46E-05 |  |  |  |  | 0.23 | 0.49 | 1000G  |
| rs1245573  | T | C | 72048070 | 73807828 | FHS | 0.59 | 0.17  | 0.04 | 1.20E-06 |  |  |  |  | 0.85 | 0.59 | gnomAD |
| rs1245574  | C | A | 72048709 | 73808467 | FHS | 0.49 | 0.14  | 0.04 | 4.51E-05 |  |  |  |  | 0.35 | 0.48 | gnomAD |
| rs1245576  | T | C | 72050912 | 73810670 | FHS | 0.59 | 0.17  | 0.04 | 1.73E-06 |  |  |  |  | 0.86 | 0.59 | gnomAD |
| rs1245577  | G | C | 72051156 | 73810914 | FHS | 0.49 | 0.15  | 0.04 | 3.70E-05 |  |  |  |  | 0.25 | 0.48 | gnomAD |
| rs61852248 | G | A | 72051760 | 73811518 | FHS | 0.08 | -0.40 | 0.11 | 1.83E-04 |  |  |  |  | 0.01 | 0.09 | gnomAD |
| rs1871453  | T | C | 72052718 | 73812476 | FHS | 0.59 | 0.17  | 0.04 | 1.73E-06 |  |  |  |  | 0.86 | 0.59 | gnomAD |
| rs4747238  | T | C | 72054787 | 73814545 | FHS | 0.58 | 0.17  | 0.04 | 1.67E-06 |  |  |  |  | 0.91 | 0.58 | 1000G  |
| rs1678621  | C | T | 72055250 | 73815008 | FHS | 0.50 | 0.15  | 0.04 | 2.44E-05 |  |  |  |  | 0.38 | 0.48 | gnomAD |
| rs11000158 | A | C | 72056209 | 73815967 | FHS | 0.50 | 0.15  | 0.04 | 1.76E-05 |  |  |  |  | 0.85 | 0.51 | 1000G  |
| rs1678622  | C | T | 72057541 | 73817299 | FHS | 0.49 | 0.15  | 0.04 | 3.41E-05 |  |  |  |  | 0.22 | 0.48 | gnomAD |
| rs1618927  | A | G | 72058014 | 73817772 | FHS | 0.58 | 0.17  | 0.04 | 3.65E-06 |  |  |  |  | 0.88 | 0.59 | gnomAD |
| rs7307     | G | A | 72059175 | 73818933 | FHS | 0.49 | 0.15  | 0.04 | 4.32E-05 |  |  |  |  | 0.22 | 0.48 | gnomAD |
| rs1049269  | A | G | 72060243 | 73820001 | FHS | 0.55 | 0.18  | 0.04 | 5.21E-07 |  |  |  |  | 0.88 | 0.55 | gnomAD |
| rs896079   | G | A | 72060638 | 73820396 | FHS | 0.46 | 0.16  | 0.04 | 9.30E-06 |  |  |  |  | 0.21 | 0.44 | gnomAD |
| rs3180     | A | G | 72060864 | 73820622 | FHS | 0.55 | 0.18  | 0.04 | 5.33E-07 |  |  |  |  | 0.87 | 0.55 | gnomAD |
| rs1678623  | C | T | 72061875 | 73821633 | FHS | 0.46 | 0.16  | 0.04 | 1.00E-05 |  |  |  |  | 0.21 | 0.44 | gnomAD |
| rs1668174  | C | T | 72061905 | 73821663 | FHS | 0.46 | 0.16  | 0.04 | 1.01E-05 |  |  |  |  | 0.21 | 0.44 | gnomAD |
| rs1049246  | A | G | 72062267 | 73822025 | FHS | 0.55 | 0.17  | 0.04 | 1.25E-06 |  |  |  |  | 0.88 | 0.55 | gnomAD |
| rs1049245  | G | T | 72062485 | 73822243 | FHS | 0.45 | 0.15  | 0.04 | 2.92E-05 |  |  |  |  | 0.11 | 0.44 | gnomAD |
| rs1530803  | C | T | 72062749 | 73822507 | FHS | 0.45 | 0.15  | 0.04 | 2.88E-05 |  |  |  |  | 0.22 | 0.44 | gnomAD |
| rs1530802  | G | A | 72063199 | 73822957 | FHS | 0.45 | 0.15  | 0.04 | 3.19E-05 |  |  |  |  | 0.15 | 0.44 | gnomAD |
| rs1668172  | A | G | 72063261 | 73823019 | FHS | 0.55 | 0.17  | 0.04 | 7.31E-07 |  |  |  |  | 0.87 | 0.55 | gnomAD |
| rs1530801  | T | C | 72063344 | 73823102 | FHS | 0.45 | 0.15  | 0.04 | 3.15E-05 |  |  |  |  | 0.15 | 0.44 | gnomAD |
| rs1530800  | G | A | 72063540 | 73823298 | FHS | 0.45 | 0.15  | 0.04 | 1.73E-05 |  |  |  |  | 0.09 | 0.44 | gnomAD |



|             |   |   |          |          |     |      |       |      |          |  |  |  |  |      |      |        |
|-------------|---|---|----------|----------|-----|------|-------|------|----------|--|--|--|--|------|------|--------|
| rs1122575   | T | G | 72063743 | 73823501 | FHS | 0.55 | 0.17  | 0.04 | 6.72E-07 |  |  |  |  | 0.90 | 0.54 | 1000G  |
| rs1613186   | C | T | 72063982 | 73823740 | FHS | 0.45 | 0.15  | 0.04 | 3.20E-05 |  |  |  |  | 0.15 | 0.44 | gnomAD |
| rs2242250   | G | A | 72064412 | 73824170 | FHS | 0.45 | 0.15  | 0.04 | 2.77E-05 |  |  |  |  | 0.15 | 0.44 | gnomAD |
| rs2242251   | C | G | 72064423 | 73824181 | FHS | 0.55 | 0.18  | 0.04 | 4.80E-07 |  |  |  |  | 0.87 | 0.55 | gnomAD |
| rs2242252   | T | C | 72064445 | 73824203 | FHS | 0.55 | 0.18  | 0.04 | 5.16E-07 |  |  |  |  | 0.87 | 0.55 | gnomAD |
| rs61852257  | G | C | 72064625 | 73824383 | FHS | 0.11 | -0.27 | 0.08 | 5.98E-04 |  |  |  |  | 0.02 | 0.12 | gnomAD |
| rs1668169   | A | G | 72065894 | 73825652 | FHS | 0.55 | 0.18  | 0.04 | 4.44E-07 |  |  |  |  | 0.90 | 0.55 | gnomAD |
| rs1668168   | A | G | 72066052 | 73825810 | FHS | 0.55 | 0.18  | 0.04 | 4.40E-07 |  |  |  |  | 0.85 | 0.55 | gnomAD |
| rs1530804   | A | G | 72067534 | 73827292 | FHS | 0.66 | 0.18  | 0.04 | 3.21E-05 |  |  |  |  | 0.92 | 0.67 | gnomAD |
| rs1245572   | G | T | 72071381 | 73831139 | FHS | 0.45 | 0.14  | 0.04 | 7.60E-05 |  |  |  |  | 0.29 | 0.43 | gnomAD |
| rs896074    | C | T | 72073101 | 73832859 | FHS | 0.56 | 0.18  | 0.04 | 3.51E-07 |  |  |  |  | 0.90 | 0.55 | gnomAD |
| rs748035    | C | T | 72073597 | 73833355 | FHS | 0.40 | 0.17  | 0.04 | 1.00E-05 |  |  |  |  | 0.14 | 0.39 | gnomAD |
| rs1245570   | G | A | 72073831 | 73833589 | FHS | 0.51 | 0.20  | 0.04 | 4.49E-08 |  |  |  |  | 0.74 | 0.51 | gnomAD |
| rs896073    | C | A | 72074150 | 73833908 | FHS | 0.40 | 0.17  | 0.04 | 9.92E-06 |  |  |  |  | 0.10 | 0.39 | gnomAD |
| rs1245569   | T | C | 72074860 | 73834618 | FHS | 0.56 | 0.18  | 0.04 | 3.32E-07 |  |  |  |  | 0.90 | 0.55 | gnomAD |
| rs1245568   | G | A | 72075030 | 73834788 | FHS | 0.56 | 0.18  | 0.04 | 3.55E-07 |  |  |  |  | 0.70 | 0.55 | gnomAD |
| rs1245567   | G | A | 72075400 | 73835158 | FHS | 0.56 | 0.18  | 0.04 | 3.53E-07 |  |  |  |  | 0.74 | 0.55 | gnomAD |
| rs1245566   | G | A | 72075891 | 73835649 | FHS | 0.56 | 0.18  | 0.04 | 3.19E-07 |  |  |  |  | 0.74 | 0.55 | gnomAD |
| rs1245565   | G | T | 72076210 | 73835968 | FHS | 0.56 | 0.18  | 0.04 | 3.20E-07 |  |  |  |  | 0.82 | 0.55 | gnomAD |
| rs11592980  | G | A | 72076837 | 73836595 | FHS | 0.22 | -0.25 | 0.05 | 4.18E-06 |  |  |  |  | 0.04 | 0.23 | gnomAD |
| rs1268456   | G | C | 72077258 | 73837016 | FHS | 0.56 | 0.18  | 0.04 | 3.11E-07 |  |  |  |  | 0.75 | 0.55 | gnomAD |
| rs1245562   | G | A | 72077583 | 73837341 | FHS | 0.56 | 0.18  | 0.04 | 2.99E-07 |  |  |  |  | 0.84 | 0.55 | gnomAD |
| rs1245561   | T | C | 72077592 | 73837350 | FHS | 0.56 | 0.18  | 0.04 | 3.19E-07 |  |  |  |  | 0.84 | 0.55 | gnomAD |
| rs1245558   | T | C | 72080104 | 73839862 | FHS | 0.52 | 0.23  | 0.04 | 3.27E-09 |  |  |  |  | 0.84 | 0.52 | gnomAD |
| rs1245557   | T | C | 72080399 | 73840157 | FHS | 0.52 | 0.23  | 0.04 | 3.25E-09 |  |  |  |  | 0.84 | 0.52 | gnomAD |
| rs1245556   | T | C | 72080599 | 73840357 | FHS | 0.52 | 0.23  | 0.04 | 3.20E-09 |  |  |  |  | 0.85 | 0.52 | gnomAD |
| rs1245555   | G | A | 72080932 | 73840690 | FHS | 0.39 | 0.22  | 0.04 | 4.67E-08 |  |  |  |  | 0.28 | 0.38 | gnomAD |
| rs75071136  | G | A | 72081644 | 73841402 | FHS | 0.04 | -0.92 | 0.23 | 7.32E-05 |  |  |  |  | 0.01 | 0.05 | gnomAD |
| rs1245552   | G | T | 72083953 | 73843711 | FHS | 0.45 | 0.25  | 0.04 | 2.92E-10 |  |  |  |  | 0.78 | 0.45 | gnomAD |
| rs1245551   | G | A | 72084088 | 73843846 | FHS | 0.45 | 0.25  | 0.04 | 2.88E-10 |  |  |  |  | 0.81 | 0.45 | gnomAD |
| rs1245550   | A | G | 72084323 | 73844081 | FHS | 0.45 | 0.25  | 0.04 | 2.89E-10 |  |  |  |  | 0.85 | 0.45 | gnomAD |
| rs1668153   | A | G | 72084805 | 73844563 | FHS | 0.45 | 0.25  | 0.04 | 2.89E-10 |  |  |  |  | 0.82 | 0.45 | gnomAD |
| rs1245548   | G | A | 72086126 | 73845884 | FHS | 0.45 | 0.25  | 0.04 | 2.92E-10 |  |  |  |  | 0.81 | 0.45 | gnomAD |
| rs1245547   | A | G | 72086583 | 73846341 | FHS | 0.45 | 0.25  | 0.04 | 2.63E-10 |  |  |  |  | 0.88 | 0.45 | gnomAD |
| rs1245546   | C | T | 72087068 | 73846826 | FHS | 0.45 | 0.24  | 0.04 | 2.96E-10 |  |  |  |  | 0.80 | 0.45 | gnomAD |
| rs751835    | T | C | 72087981 | 73847739 | FHS | 0.45 | 0.24  | 0.04 | 2.98E-10 |  |  |  |  | 0.83 | 0.45 | gnomAD |
| rs1245540   | C | T | 72089994 | 73849752 | FHS | 0.45 | 0.24  | 0.04 | 3.77E-10 |  |  |  |  | 0.83 | 0.45 | gnomAD |
| rs186424026 | A | G | 72096115 | 73855873 | FHS | 0.00 | 16.12 | 4.62 | 4.87E-04 |  |  |  |  | 0.00 | 0.00 | gnomAD |
| rs1133381   | A | T | 72096886 | 73856644 | FHS | 0.04 | 0.73  | 0.17 | 2.92E-05 |  |  |  |  | 0.01 | 0.05 | gnomAD |
| rs1668156   | T | C | 72098791 | 73858549 | FHS | 0.41 | 0.17  | 0.04 | 2.52E-06 |  |  |  |  | 0.09 | 0.39 | gnomAD |
| rs1678612   | C | A | 72099631 | 73859389 | FHS | 0.44 | 0.23  | 0.04 | 7.08E-10 |  |  |  |  | 0.83 | 0.45 | gnomAD |

|             |   |   |          |          |     |      |        |      |          |  |  |  |  |      |      |        |
|-------------|---|---|----------|----------|-----|------|--------|------|----------|--|--|--|--|------|------|--------|
| rs1668166   | C | T | 72103623 | 73863381 | FHS | 0.10 | 0.46   | 0.10 | 1.05E-05 |  |  |  |  | 0.02 | 0.11 | gnomAD |
| rs11000174  | T | C | 72105373 | 73865131 | FHS | 0.41 | 0.17   | 0.04 | 2.43E-06 |  |  |  |  | 0.19 | 0.39 | gnomAD |
| rs7072673   | A | C | 72105984 | 73865742 | FHS | 0.49 | 0.22   | 0.03 | 5.83E-10 |  |  |  |  | 0.82 | 0.48 | gnomAD |
| rs1678613   | T | C | 72106753 | 73866511 | FHS | 0.45 | 0.23   | 0.04 | 4.33E-10 |  |  |  |  | 0.79 | 0.45 | gnomAD |
| rs55725431  | C | A | 72107312 | 73867070 | FHS | 0.42 | 0.24   | 0.04 | 7.55E-10 |  |  |  |  | 0.29 | 0.45 | gnomAD |
| rs921360    | T | G | 72107781 | 73867539 | FHS | 0.04 | 0.69   | 0.17 | 2.99E-05 |  |  |  |  | 0.01 | 0.04 | gnomAD |
| rs11818980  | C | T | 72112816 | 73872574 | FHS | 0.48 | 0.21   | 0.04 | 2.37E-09 |  |  |  |  | 0.86 | 0.47 | gnomAD |
| rs1271352   | A | C | 72120916 | 73880674 | FHS | 0.41 | 0.17   | 0.04 | 3.36E-06 |  |  |  |  | 0.17 | 0.39 | gnomAD |
| rs1245578   | G | A | 72123438 | 73883196 | FHS | 0.41 | 0.17   | 0.04 | 3.01E-06 |  |  |  |  | 0.09 | 0.39 | gnomAD |
| rs1245579   | C | T | 72123792 | 73883550 | FHS | 0.44 | 0.20   | 0.04 | 1.96E-08 |  |  |  |  | 0.80 | 0.42 | gnomAD |
| rs3780949   | C | T | 72126549 | 73886307 | FHS | 0.40 | 0.21   | 0.04 | 9.78E-08 |  |  |  |  | 0.80 | 0.42 | gnomAD |
| rs1245515   | C | T | 72139335 | 73899093 | FHS | 0.40 | 0.18   | 0.04 | 3.89E-06 |  |  |  |  | 0.18 | 0.39 | gnomAD |
| rs1245516   | G | C | 72142747 | 73902505 | FHS | 0.67 | 0.13   | 0.04 | 5.48E-04 |  |  |  |  | 0.92 | 0.64 | gnomAD |
| rs1271933   | T | C | 72143117 | 73902875 | FHS | 0.44 | 0.20   | 0.04 | 5.25E-08 |  |  |  |  | 0.86 | 0.39 | 1000G  |
| rs10823904  | C | T | 72143577 | 73903335 | FHS | 0.67 | 0.13   | 0.04 | 5.38E-04 |  |  |  |  | 0.92 | 0.63 | gnomAD |
| rs1668157   | A | G | 72146392 | 73906150 | FHS | 0.44 | 0.20   | 0.04 | 3.22E-08 |  |  |  |  | 0.83 | 0.42 | gnomAD |
| rs7903025   | A | G | 72154595 | 73914353 | FHS | 0.47 | 0.18   | 0.04 | 7.49E-07 |  |  |  |  | 0.79 | 0.45 | gnomAD |
| rs7903371   | G | A | 72154649 | 73914407 | FHS | 0.47 | 0.18   | 0.04 | 1.07E-06 |  |  |  |  | 0.20 | 0.45 | gnomAD |
| rs11000195  | A | G | 72160873 | 73920631 | FHS | 0.41 | 0.19   | 0.04 | 4.36E-06 |  |  |  |  | 0.17 | 0.44 | gnomAD |
| rs191278017 | G | A | 72162328 | 73922086 | FHS | 0.01 | 2.08   | 0.63 | 9.75E-04 |  |  |  |  | 0.00 | 0.00 | gnomAD |
| rs189888811 | C | T | 72168139 | 73927897 | FHS | 0.00 | 10.16  | 2.65 | 1.26E-04 |  |  |  |  | 0.00 | 0.00 | gnomAD |
| rs75512055  | A | G | 72169617 | 73929375 | FHS | 0.04 | 0.84   | 0.24 | 4.29E-04 |  |  |  |  | 0.01 | 0.06 | gnomAD |
| rs11000202  | A | G | 72173941 | 73933699 | FHS | 0.52 | 0.15   | 0.04 | 3.56E-05 |  |  |  |  | 0.18 | 0.48 | gnomAD |
| rs188661925 | G | A | 72176240 | 73935998 | FHS | 0.00 | 10.16  | 2.66 | 1.31E-04 |  |  |  |  | 0.00 | 0.00 | 1000G  |
| rs7099664   | C | A | 72176939 | 73936697 | FHS | 0.52 | 0.15   | 0.04 | 3.55E-05 |  |  |  |  | 0.15 | 0.48 | gnomAD |
| rs11000204  | A | G | 72178808 | 73938566 | FHS | 0.52 | 0.15   | 0.04 | 3.52E-05 |  |  |  |  | 0.18 | 0.48 | gnomAD |
| rs11816517  | G | A | 72187902 | 73947660 | FHS | 0.52 | 0.15   | 0.04 | 2.21E-05 |  |  |  |  | 0.30 | 0.49 | gnomAD |
| rs11819693  | G | C | 72189265 | 73949023 | FHS | 0.34 | 0.18   | 0.05 | 5.55E-04 |  |  |  |  | 0.22 | 0.48 | 1000G  |
| rs4635010   | T | G | 72190054 | 73949812 | FHS | 0.54 | 0.16   | 0.04 | 3.81E-06 |  |  |  |  | 0.79 | 0.50 | gnomAD |
| rs186810428 | T | C | 72194921 | 73954679 | FHS | 0.01 | 3.33   | 0.99 | 7.79E-04 |  |  |  |  | 0.00 | 0.01 | gnomAD |
| rs12221099  | A | T | 72195563 | 73955321 | FHS | 0.55 | 0.18   | 0.04 | 1.38E-06 |  |  |  |  | 0.73 | 0.52 | gnomAD |
| rs61853776  | G | A | 72195789 | 73955547 | FHS | 0.52 | 0.15   | 0.04 | 3.08E-05 |  |  |  |  | 0.30 | 0.49 | gnomAD |
| rs11000212  | C | G | 72195894 | 73955652 | FHS | 0.54 | 0.16   | 0.04 | 5.57E-06 |  |  |  |  | 0.81 | 0.50 | gnomAD |
| rs11597688  | T | C | 72196621 | 73956379 | FHS | 0.04 | -1.05  | 0.25 | 2.82E-05 |  |  |  |  | 0.01 | 0.04 | gnomAD |
| rs189962063 | A | G | 72198379 | 73958137 | FHS | 0.22 | 0.27   | 0.08 | 5.32E-04 |  |  |  |  | N/A  | N/A  | N/A    |
| rs7069703   | G | T | 72210693 | 73970451 | FHS | 0.53 | 0.16   | 0.04 | 3.05E-05 |  |  |  |  | 0.29 | 0.49 | gnomAD |
| rs7073342   | C | T | 72211079 | 73970837 | FHS | 0.50 | 0.13   | 0.04 | 6.75E-04 |  |  |  |  | 0.12 | 0.47 | gnomAD |
| rs74664904  | C | T | 72212352 | 73972110 | FHS | 0.00 | -20.87 | 5.64 | 2.14E-04 |  |  |  |  | 0.02 | 0.00 | gnomAD |
| rs76731640  | A | G | 72214789 | 73974547 | FHS | 0.03 | -1.16  | 0.28 | 3.41E-05 |  |  |  |  | 0.00 | 0.05 | 1000G  |
| rs41282258  | A | T | 72215443 | 73975201 | FHS | 0.03 | -1.17  | 0.28 | 3.26E-05 |  |  |  |  | 0.01 | 0.04 | gnomAD |
| rs3206257   | A | G | 72217938 | 73977696 | FHS | 0.53 | 0.16   | 0.04 | 2.80E-05 |  |  |  |  | 0.25 | 0.49 | gnomAD |

|             |   |   |          |          |     |      |        |       |          |  |  |  |  |      |      |        |
|-------------|---|---|----------|----------|-----|------|--------|-------|----------|--|--|--|--|------|------|--------|
| rs7092282   | G | A | 72220736 | 73980494 | FHS | 0.51 | 0.16   | 0.04  | 8.99E-05 |  |  |  |  | 0.29 | 0.53 | gnomAD |
| rs9415056   | C | T | 72221926 | 73981684 | FHS | 0.52 | 0.15   | 0.04  | 5.75E-05 |  |  |  |  | 0.30 | 0.49 | gnomAD |
| rs4554797   | A | G | 72228506 | 73988264 | FHS | 0.54 | 0.18   | 0.04  | 3.83E-06 |  |  |  |  | 0.81 | 0.50 | gnomAD |
| rs10823909  | T | C | 72229426 | 73989184 | FHS | 0.07 | -0.59  | 0.16  | 2.27E-04 |  |  |  |  | 0.03 | 0.08 | gnomAD |
| rs7913447   | C | A | 72232282 | 73992040 | FHS | 0.64 | 0.14   | 0.04  | 6.75E-04 |  |  |  |  | 0.30 | 0.59 | gnomAD |
| rs7913505   | A | G | 72232469 | 73992227 | FHS | 0.64 | 0.16   | 0.04  | 1.33E-04 |  |  |  |  | 0.81 | 0.60 | gnomAD |
| rs6480601   | T | C | 72235007 | 73994765 | FHS | 0.68 | 0.19   | 0.04  | 1.48E-05 |  |  |  |  | 0.89 | 0.65 | gnomAD |
| rs9415059   | G | A | 72238962 | 73998720 | FHS | 0.62 | 0.14   | 0.04  | 7.24E-04 |  |  |  |  | 0.30 | 0.57 | gnomAD |
| rs4999044   | C | T | 72239399 | 73999157 | FHS | 0.62 | 0.14   | 0.04  | 7.01E-04 |  |  |  |  | 0.19 | 0.57 | gnomAD |
| rs149925664 | C | T | 72240082 | 73999840 | FHS | 0.01 | 6.07   | 1.68  | 3.06E-04 |  |  |  |  | 0.00 | 0.00 | gnomAD |
| rs183992191 | G | A | 72243286 | 74003044 | FHS | 0.00 | -37.08 | 11.16 | 8.91E-04 |  |  |  |  | N/A  | N/A  | N/A    |
| rs147854178 | G | A | 72243489 | 74003247 | FHS | 0.00 | 8.16   | 2.36  | 5.50E-04 |  |  |  |  | 0.00 | 0.00 | gnomAD |
| rs7092573   | G | A | 72251027 | 74010785 | FHS | 0.37 | -0.15  | 0.04  | 1.54E-04 |  |  |  |  | 0.19 | 0.42 | gnomAD |
| rs11000235  | A | G | 72256018 | 74015776 | FHS | 0.36 | -0.15  | 0.04  | 1.70E-04 |  |  |  |  | 0.13 | 0.42 | gnomAD |
| rs4625377   | G | T | 72257718 | 74017476 | FHS | 0.36 | -0.15  | 0.04  | 1.56E-04 |  |  |  |  | 0.17 | 0.42 | gnomAD |
| rs4746110   | C | T | 72259949 | 74019707 | FHS | 0.36 | -0.15  | 0.04  | 1.63E-04 |  |  |  |  | 0.17 | 0.42 | gnomAD |
| rs10762503  | G | A | 72261800 | 74021558 | FHS | 0.37 | -0.15  | 0.04  | 1.63E-04 |  |  |  |  | 0.17 | 0.42 | gnomAD |
| rs12219429  | G | A | 72262848 | 74022606 | FHS | 0.36 | -0.15  | 0.04  | 1.64E-04 |  |  |  |  | 0.17 | 0.42 | gnomAD |
| rs10733885  | G | T | 72265115 | 74024873 | FHS | 0.36 | -0.15  | 0.04  | 1.79E-04 |  |  |  |  | 0.14 | 0.42 | gnomAD |
| rs7900677   | G | A | 72266833 | 74026591 | FHS | 0.34 | -0.15  | 0.04  | 2.07E-04 |  |  |  |  | 0.19 | 0.43 | gnomAD |
| rs4405230   | G | T | 72271450 | 74031208 | FHS | 0.36 | -0.14  | 0.04  | 2.63E-04 |  |  |  |  | 0.17 | 0.41 | gnomAD |
| rs10465978  | C | A | 72271811 | 74031569 | FHS | 0.36 | -0.14  | 0.04  | 2.69E-04 |  |  |  |  | 0.17 | 0.41 | gnomAD |
| rs1053639   | T | A | 72275283 | 74035041 | FHS | 0.36 | -0.14  | 0.04  | 3.03E-04 |  |  |  |  | 0.25 | 0.41 | gnomAD |
| rs4747241   | C | T | 72276671 | 74036429 | FHS | 0.36 | -0.13  | 0.04  | 4.68E-04 |  |  |  |  | 0.57 | 0.41 | gnomAD |
| rs4747242   | A | C | 72277435 | 74037193 | FHS | 0.36 | -0.13  | 0.04  | 3.15E-04 |  |  |  |  | 0.17 | 0.41 | gnomAD |
| rs7898235   | C | A | 72278423 | 74038181 | FHS | 0.36 | -0.13  | 0.04  | 3.17E-04 |  |  |  |  | 0.17 | 0.41 | gnomAD |
| rs10733886  | A | C | 72279316 | 74039074 | FHS | 0.36 | -0.13  | 0.04  | 3.18E-04 |  |  |  |  | 0.13 | 0.40 | 1000G  |
| rs10762504  | C | A | 72279577 | 74039335 | FHS | 0.36 | -0.13  | 0.04  | 3.17E-04 |  |  |  |  | 0.17 | 0.41 | gnomAD |
| rs10740397  | G | A | 72280004 | 74039762 | FHS | 0.36 | -0.13  | 0.04  | 3.20E-04 |  |  |  |  | 0.17 | 0.41 | gnomAD |
| rs10823911  | A | C | 72280276 | 74040034 | FHS | 0.36 | -0.13  | 0.04  | 3.20E-04 |  |  |  |  | 0.17 | 0.41 | gnomAD |
| rs4746112   | G | A | 72283237 | 74042995 | FHS | 0.36 | -0.13  | 0.04  | 3.27E-04 |  |  |  |  | 0.17 | 0.41 | gnomAD |
| rs6480611   | T | C | 72283576 | 74043334 | FHS | 0.37 | -0.12  | 0.04  | 9.88E-04 |  |  |  |  | 0.65 | 0.42 | gnomAD |
| rs12768834  | A | G | 72284116 | 74043874 | FHS | 0.36 | -0.13  | 0.04  | 3.28E-04 |  |  |  |  | 0.13 | 0.40 | 1000G  |
| rs10509767  | A | C | 72286159 | 74045917 | FHS | 0.35 | -0.13  | 0.04  | 4.15E-04 |  |  |  |  | 0.17 | 0.41 | gnomAD |
| rs10740398  | C | G | 72286433 | 74046191 | FHS | 0.35 | -0.13  | 0.04  | 4.16E-04 |  |  |  |  | 0.17 | 0.41 | gnomAD |
| rs10762505  | C | T | 72286454 | 74046212 | FHS | 0.35 | -0.13  | 0.04  | 4.27E-04 |  |  |  |  | 0.18 | 0.41 | gnomAD |
| rs7074233   | T | A | 72290460 | 74050218 | FHS | 0.35 | -0.14  | 0.04  | 6.43E-04 |  |  |  |  | 0.62 | 0.39 | gnomAD |
| rs7090673   | C | T | 72290745 | 74050503 | FHS | 0.35 | -0.13  | 0.04  | 8.94E-04 |  |  |  |  | 0.56 | 0.39 | gnomAD |
| rs187918547 | G | A | 72292842 | 74052600 | FHS | 0.00 | 5.04   | 1.49  | 7.33E-04 |  |  |  |  | 0.00 | 0.00 | TopMed |
| rs7088870   | T | C | 72293555 | 74053313 | FHS | 0.35 | -0.14  | 0.04  | 5.27E-04 |  |  |  |  | 0.66 | 0.39 | gnomAD |
| rs10762506  | T | C | 72293993 | 74053751 | FHS | 0.35 | -0.13  | 0.04  | 7.83E-04 |  |  |  |  | 0.71 | 0.39 | gnomAD |

|             |    |   |          |          |     |      |        |       |          |      |       |      |          |      |      |        |
|-------------|----|---|----------|----------|-----|------|--------|-------|----------|------|-------|------|----------|------|------|--------|
| rs3998462   | T  | C | 72295113 | 74054871 | FHS | 0.36 | -0.13  | 0.04  | 7.26E-04 |      |       |      |          | 0.82 | 0.39 | gnomAD |
| rs6480615   | C  | A | 72297884 | 74057642 | FHS | 0.35 | -0.14  | 0.04  | 3.24E-04 |      |       |      |          | 0.62 | 0.39 | gnomAD |
| rs6480616   | C  | T | 72298086 | 74057844 | FHS | 0.35 | -0.14  | 0.04  | 3.24E-04 |      |       |      |          | 0.62 | 0.39 | gnomAD |
| rs10762508  | G  | A | 72298753 | 74058511 | FHS | 0.35 | -0.14  | 0.04  | 3.24E-04 |      |       |      |          | 0.62 | 0.39 | gnomAD |
| rs10762509  | G  | A | 72299605 | 74059363 | FHS | 0.35 | -0.14  | 0.04  | 3.47E-04 |      |       |      |          | 0.62 | 0.39 | gnomAD |
| rs10823912  | T  | A | 72299714 | 74059472 | FHS | 0.34 | -0.15  | 0.04  | 3.32E-04 |      |       |      |          | 0.62 | 0.39 | gnomAD |
| rs10740399  | A  | G | 72300443 | 74060201 | FHS | 0.35 | -0.14  | 0.04  | 4.93E-04 |      |       |      |          | 0.82 | 0.39 | gnomAD |
| rs10740400  | C  | G | 72300772 | 74060530 | FHS | 0.34 | -0.14  | 0.04  | 8.30E-04 |      |       |      |          | 0.81 | 0.39 | gnomAD |
| rs4451633   | C  | T | 72306191 | 74065949 | FHS | 0.35 | -0.14  | 0.04  | 3.61E-04 |      |       |      |          | 0.60 | 0.38 | gnomAD |
| rs10733887  | T  | C | 72307957 | 74067715 | FHS | 0.34 | -0.13  | 0.04  | 7.58E-04 |      |       |      |          | 0.53 | 0.37 | 1000G  |
| rs11596698  | C  | G | 72309687 | 74069445 | FHS | 0.35 | -0.14  | 0.04  | 6.09E-04 |      |       |      |          | 0.71 | 0.39 | gnomAD |
| rs4074609   | C  | T | 72310024 | 74069782 | FHS | 0.35 | -0.14  | 0.04  | 6.10E-04 |      |       |      |          | 0.70 | 0.39 | gnomAD |
| rs4746115   | T  | C | 72311524 | 74071282 | FHS | 0.56 | -0.20  | 0.05  | 2.94E-04 |      |       |      |          | 0.66 | 0.61 | gnomAD |
| rs4746116   | C  | T | 72312378 | 74072136 | FHS | 0.35 | -0.14  | 0.04  | 4.15E-04 |      |       |      |          | 0.61 | 0.38 | gnomAD |
| rs7081608   | A  | G | 72313279 | 74073037 | FHS | 0.35 | -0.14  | 0.04  | 5.95E-04 |      |       |      |          | 0.76 | 0.39 | gnomAD |
| rs185272181 | A  | G | 72316819 | 74076577 | FHS | 0.01 | -3.15  | 0.89  | 4.21E-04 |      |       |      |          | 0.00 | 0.01 | gnomAD |
| rs184850960 | G  | A | 72317537 | 74077295 | FHS | 0.00 | 5.39   | 1.58  | 6.52E-04 |      |       |      |          | 0.00 | 0.00 | gnomAD |
| rs4747245   | A  | T | 72317550 | 74077308 | FHS | 0.36 | -0.13  | 0.04  | 6.94E-04 |      |       |      |          | 0.78 | 0.40 | gnomAD |
| rs4747246   | C  | T | 72317635 | 74077393 | FHS | 0.36 | -0.14  | 0.04  | 4.31E-04 |      |       |      |          | 0.62 | 0.39 | gnomAD |
| rs4596994   | T  | G | 72318650 | 74078408 | FHS | 0.64 | 0.14   | 0.04  | 4.33E-04 |      |       |      |          | 0.38 | 0.61 | gnomAD |
| rs2394861   | T  | C | 72318869 | 74078627 | FHS | 0.64 | 0.13   | 0.04  | 7.00E-04 |      |       |      |          | 0.22 | 0.60 | gnomAD |
| rs9416013   | A  | G | 72322454 | 74082212 | FHS | 0.64 | 0.14   | 0.04  | 4.65E-04 |      |       |      |          | 0.38 | 0.61 | gnomAD |
| rs7895933   | A  | G | 72323669 | 74083427 | FHS | 0.64 | 0.13   | 0.04  | 6.95E-04 |      |       |      |          | 0.38 | 0.61 | gnomAD |
| rs7908857   | A  | G | 72326345 | 74086103 | FHS | 0.62 | 0.14   | 0.04  | 5.65E-04 |      |       |      |          | 0.39 | 0.61 | gnomAD |
| rs9415062   | G  | A | 72326507 | 74086265 | FHS | 0.64 | 0.14   | 0.04  | 4.84E-04 |      |       |      |          | 0.37 | 0.60 | gnomAD |
| rs9415063   | C  | T | 72326894 | 74086652 | FHS | 0.63 | 0.13   | 0.04  | 5.12E-04 |      |       |      |          | 0.38 | 0.60 | gnomAD |
| rs9415065   | G  | A | 72330881 | 74090639 | FHS | 0.59 | 0.13   | 0.04  | 8.51E-04 |      |       |      |          | 0.29 | 0.59 | gnomAD |
| rs9415066   | T  | C | 72332166 | 74091924 | FHS | 0.63 | 0.13   | 0.04  | 6.71E-04 |      |       |      |          | 0.45 | 0.60 | gnomAD |
| rs9416016   | T  | C | 72332192 | 74091950 | FHS | 0.63 | 0.13   | 0.04  | 9.89E-04 |      |       |      |          | 0.52 | 0.59 | gnomAD |
| rs78167085  | T  | G | 72338530 | 74098288 | FHS | 0.00 | 18.07  | 5.15  | 4.52E-04 |      |       |      |          | N/A  | N/A  | N/A    |
| rs9416017   | T  | C | 72340521 | 74100279 | FHS | 0.62 | 0.13   | 0.04  | 4.72E-04 |      |       |      |          | 0.39 | 0.59 | gnomAD |
| rs9415068   | T  | C | 72353575 | 74113333 | FHS | 0.63 | 0.12   | 0.04  | 9.74E-04 |      |       |      |          | 0.46 | 0.60 | gnomAD |
| rs151082560 | C  | T | 72369216 | 74128974 | FHS | 0.00 | -4.58  | 1.33  | 5.86E-04 |      |       |      |          | 0.00 | 0.01 | gnomAD |
| rs149854263 | G  | A | 72381013 | 74140771 | FHS | 0.00 | -6.55  | 1.94  | 7.46E-04 |      |       |      |          | 0.00 | 0.01 | gnomAD |
| rs141390379 | G  | A | 72411473 | 74171231 | FHS | 0.03 | -1.16  | 0.31  | 2.14E-04 |      |       |      |          | 0.01 | 0.04 | gnomAD |
| rs12357178  | T  | G | 72417288 | 74177046 | FHS | 0.01 | 8.11   | 2.09  | 1.05E-04 |      |       |      |          | 0.00 | 0.01 | gnomAD |
| rs148732335 | C  | T | 72436516 | 74196274 | FHS | 0.00 | 40.21  | 11.64 | 5.53E-04 |      |       |      |          | 0.03 | 0.00 | 1000G  |
| rs192251055 | G  | A | 72448458 | 74208216 | FHS | 0.00 | -21.44 | 6.12  | 4.61E-04 |      |       |      |          | 0.00 | 0.00 | 1000G  |
| rs190062403 | A  | T | 72469992 | 74229750 | FHS | 0.00 | 7.61   | 2.25  | 7.22E-04 |      |       |      |          | 0.00 | 0.00 | gnomAD |
| rs186052708 | T  | C | 72500694 | 74260452 | FHS | 0.00 | -21.31 | 6.21  | 6.01E-04 |      |       |      |          | 0.00 | 0.00 | gnomAD |
| N/A         | GA | G | 71956576 |          | JHS |      |        |       |          | 0.01 | -0.65 | 0.20 | 8.46E-04 | N/A  | N/A  | N/A    |

|             |                                |               |          |     |  |  |  |  |      |       |      |          |      |      |        |
|-------------|--------------------------------|---------------|----------|-----|--|--|--|--|------|-------|------|----------|------|------|--------|
| N/A         | GACTTC<br>TC                   | G             | 72061318 | JHS |  |  |  |  | 0.04 | 0.43  | 0.08 | 1.23E-08 | N/A  | N/A  | N/A    |
| N/A         | TA                             | T             | 72115024 | JHS |  |  |  |  | 0.09 | -0.20 | 0.05 | 2.77E-04 | N/A  | N/A  | N/A    |
| N/A         | C                              | CTGCA<br>GA   | 72125921 | JHS |  |  |  |  | 0.09 | -0.20 | 0.05 | 2.77E-04 | N/A  | N/A  | N/A    |
| N/A         | TAAGTA<br>CCAGC<br>CTTAAC<br>A | T             | 72176773 | JHS |  |  |  |  | 0.09 | -0.21 | 0.05 | 1.50E-04 | N/A  | N/A  | N/A    |
| N/A         | GA                             | G             | 72191643 | JHS |  |  |  |  | 0.09 | -0.20 | 0.05 | 2.03E-04 | N/A  | N/A  | N/A    |
| N/A         | AT                             | A             | 72217898 | JHS |  |  |  |  | 0.24 | -0.12 | 0.04 | 6.00E-04 | N/A  | N/A  | N/A    |
| N/A         | C                              | CA            | 72236695 | JHS |  |  |  |  | 0.06 | 0.36  | 0.07 | 4.82E-08 | N/A  | N/A  | N/A    |
| N/A         | A                              | ACCTGT<br>AAT | 72245440 | JHS |  |  |  |  | 0.22 | 0.13  | 0.04 | 3.49E-04 | N/A  | N/A  | N/A    |
| rs150102490 | C                              | G             | 71733394 | JHS |  |  |  |  | 0.00 | -1.26 | 0.36 | 4.86E-04 | 0.00 | 0.00 | gnomAD |
| rs180883963 | G                              | A             | 71881609 | JHS |  |  |  |  | 0.01 | -0.51 | 0.14 | 2.51E-04 | 0.01 | 0.00 | gnomAD |
| rs139161104 | G                              | T             | 71885295 | JHS |  |  |  |  | 0.01 | -0.51 | 0.14 | 2.51E-04 | 0.01 | 0.00 | gnomAD |
| rs146071707 | C                              | T             | 71896618 | JHS |  |  |  |  | 0.01 | -0.52 | 0.14 | 2.36E-04 | 0.01 | 0.00 | gnomAD |
| rs7086312   | G                              | A             | 71925281 | JHS |  |  |  |  | 0.85 | 0.16  | 0.04 | 3.02E-04 | 0.85 | 0.84 | gnomAD |
| rs7090196   | G                              | C             | 71931621 | JHS |  |  |  |  | 0.88 | 0.20  | 0.05 | 1.43E-05 | 0.89 | 0.84 | gnomAD |
| rs148578852 | T                              | C             | 71989638 | JHS |  |  |  |  | 0.01 | -0.64 | 0.19 | 7.25E-04 | 0.01 | 0.00 | gnomAD |
| rs7067841   | C                              | T             | 72039958 | JHS |  |  |  |  | 0.41 | -0.12 | 0.03 | 2.81E-04 | 0.41 | 0.01 | gnomAD |
| rs7072898   | G                              | A             | 72040947 | JHS |  |  |  |  | 0.38 | -0.11 | 0.03 | 4.37E-04 | 0.39 | 0.01 | gnomAD |
| rs138197677 | A                              | G             | 72041162 | JHS |  |  |  |  | 0.17 | 0.14  | 0.04 | 7.15E-04 | 0.15 | 0.09 | gnomAD |
| rs11819113  | G                              | T             | 72042615 | JHS |  |  |  |  | 0.07 | 0.25  | 0.06 | 6.42E-05 | 0.06 | 0.00 | gnomAD |
| rs11819136  | C                              | T             | 72042892 | JHS |  |  |  |  | 0.09 | 0.24  | 0.06 | 1.13E-05 | 0.08 | 0.00 | gnomAD |
| rs56717090  | A                              | C             | 72045399 | JHS |  |  |  |  | 0.17 | 0.14  | 0.04 | 9.53E-04 | 0.16 | 0.09 | gnomAD |
| rs16929573  | A                              | G             | 72045641 | JHS |  |  |  |  | 0.17 | 0.14  | 0.04 | 9.53E-04 | 0.17 | 0.09 | gnomAD |
| rs73271371  | G                              | C             | 72045740 | JHS |  |  |  |  | 0.09 | 0.25  | 0.06 | 4.08E-06 | 0.09 | 0.00 | 1000G  |
| rs73271373  | A                              | T             | 72045847 | JHS |  |  |  |  | 0.17 | 0.14  | 0.04 | 9.53E-04 | 0.17 | 0.09 | gnomAD |
| rs76278312  | G                              | C             | 72046007 | JHS |  |  |  |  | 0.17 | 0.14  | 0.04 | 9.53E-04 | 0.17 | 0.09 | gnomAD |
| rs76719982  | G                              | C             | 72046046 | JHS |  |  |  |  | 0.17 | 0.14  | 0.04 | 9.53E-04 | 0.17 | 0.09 | gnomAD |
| rs7101146   | C                              | T             | 72046826 | JHS |  |  |  |  | 0.24 | -0.12 | 0.04 | 4.98E-04 | 0.24 | 0.01 | gnomAD |
| rs148959315 | C                              | T             | 72047230 | JHS |  |  |  |  | 0.07 | 0.26  | 0.06 | 2.86E-05 | 0.06 | 0.00 | gnomAD |
| rs148866608 | G                              | A             | 72050571 | JHS |  |  |  |  | 0.01 | -0.71 | 0.17 | 4.11E-05 | 0.01 | 0.00 | 1000G  |
| rs45537040  | C                              | T             | 72059526 | JHS |  |  |  |  | 0.04 | 0.41  | 0.08 | 1.41E-07 | 0.03 | 0.00 | gnomAD |
| rs73273212  | G                              | A             | 72063574 | JHS |  |  |  |  | 0.14 | 0.19  | 0.04 | 3.18E-05 | 0.14 | 0.09 | gnomAD |
| rs16929601  | C                              | T             | 72067489 | JHS |  |  |  |  | 0.22 | -0.13 | 0.04 | 5.95E-04 | 0.25 | 0.02 | 1000G  |
| rs115391018 | C                              | A             | 72070690 | JHS |  |  |  |  | 0.11 | -0.18 | 0.05 | 4.06E-04 | 0.11 | 0.00 | gnomAD |
| rs1973000   | A                              | G             | 72078238 | JHS |  |  |  |  | 0.13 | -0.25 | 0.05 | 1.14E-07 | 0.12 | 0.00 | gnomAD |
| rs4328153   | A                              | G             | 72078333 | JHS |  |  |  |  | 0.21 | -0.15 | 0.04 | 9.40E-05 | 0.21 | 0.00 | gnomAD |
| rs116180558 | C                              | T             | 72078701 | JHS |  |  |  |  | 0.11 | -0.27 | 0.05 | 6.44E-08 | 0.11 | 0.00 | gnomAD |
| rs76969381  | C                              | T             | 72080037 | JHS |  |  |  |  | 0.15 | -0.15 | 0.04 | 5.94E-04 | 0.16 | 0.00 | gnomAD |

|              |    |    |          |     |  |  |  |  |      |       |      |          |      |      |        |
|--------------|----|----|----------|-----|--|--|--|--|------|-------|------|----------|------|------|--------|
| rs76696890   | G  | A  | 72081427 | JHS |  |  |  |  | 0.15 | -0.15 | 0.04 | 6.05E-04 | 0.16 | 0.00 | gnomAD |
| rs116264251  | G  | A  | 72084156 | JHS |  |  |  |  | 0.17 | -0.32 | 0.04 | 2.34E-14 | 0.17 | 0.00 | gnomAD |
| rs75386229   | G  | A  | 72084204 | JHS |  |  |  |  | 0.08 | -0.29 | 0.06 | 5.04E-07 | 0.08 | 0.00 | gnomAD |
| rs145766049  | G  | C  | 72088427 | JHS |  |  |  |  | 0.01 | -0.66 | 0.17 | 6.17E-05 | 0.01 | 0.00 | gnomAD |
| rs75029863   | A  | G  | 72089107 | JHS |  |  |  |  | 0.07 | -0.30 | 0.06 | 8.89E-07 | 0.08 | 0.00 | gnomAD |
| rs114448460  | T  | A  | 72089761 | JHS |  |  |  |  | 0.05 | 0.46  | 0.07 | 5.63E-10 | 0.05 | 0.00 | gnomAD |
| rs115188000  | C  | G  | 72090846 | JHS |  |  |  |  | 0.07 | -0.30 | 0.06 | 8.89E-07 | 0.08 | 0.00 | 1000G  |
| rs80082343   | T  | A  | 72091798 | JHS |  |  |  |  | 0.15 | -0.32 | 0.04 | 1.37E-13 | 0.16 | 0.00 | gnomAD |
| rs79044053   | C  | T  | 72092520 | JHS |  |  |  |  | 0.15 | -0.32 | 0.04 | 1.37E-13 | 0.16 | 0.00 | gnomAD |
| rs6480596    | C  | T  | 72093700 | JHS |  |  |  |  | 0.08 | -0.29 | 0.06 | 5.04E-07 | 0.08 | 0.00 | gnomAD |
| rs192521991  | C  | A  | 72095617 | JHS |  |  |  |  | 0.07 | -0.30 | 0.06 | 8.89E-07 | 0.07 | 0.00 | gnomAD |
| rs115934788  | G  | C  | 72096248 | JHS |  |  |  |  | 0.07 | -0.30 | 0.06 | 8.89E-07 | 0.07 | 0.00 | gnomAD |
| rs78843480   | A  | G  | 72096470 | JHS |  |  |  |  | 0.15 | -0.32 | 0.04 | 1.58E-13 | 0.16 | 0.00 | gnomAD |
| rs115222004  | A  | T  | 72096828 | JHS |  |  |  |  | 0.05 | -0.30 | 0.07 | 3.05E-05 | 0.05 | 0.00 | gnomAD |
| rs76563850   | A  | T  | 72101901 | JHS |  |  |  |  | 0.05 | 0.45  | 0.07 | 1.87E-09 | 0.04 | 0.00 | gnomAD |
| rs7915557    | C  | T  | 72102696 | JHS |  |  |  |  | 0.20 | -0.14 | 0.04 | 1.50E-04 | 0.23 | 0.06 | gnomAD |
| rs74457766   | T  | C  | 72103692 | JHS |  |  |  |  | 0.08 | -0.29 | 0.06 | 7.68E-07 | 0.08 | 0.00 | gnomAD |
| rs116617313  | T  | C  | 72105106 | JHS |  |  |  |  | 0.05 | -0.32 | 0.07 | 6.55E-06 | 0.05 | 0.00 | gnomAD |
| rs77808309   | G  | A  | 72106401 | JHS |  |  |  |  | 0.08 | -0.29 | 0.06 | 7.43E-07 | 0.08 | 0.00 | gnomAD |
| rs7082005    | C  | G  | 72107737 | JHS |  |  |  |  | 0.11 | -0.19 | 0.05 | 1.12E-04 | 0.11 | 0.00 | gnomAD |
| rs59260836   | G  | C  | 72111142 | JHS |  |  |  |  | 0.13 | -0.19 | 0.05 | 4.54E-05 | 0.13 | 0.00 | gnomAD |
| rs11813355   | T  | C  | 72112674 | JHS |  |  |  |  | 0.15 | 0.19  | 0.04 | 2.07E-05 | 0.14 | 0.00 | gnomAD |
| rs1044911244 | CT | C  | 72116505 | JHS |  |  |  |  | 0.09 | -0.20 | 0.05 | 2.77E-04 | N/A  | N/A  | TopMed |
| rs112882396  | C  | T  | 72117052 | JHS |  |  |  |  | 0.09 | -0.20 | 0.05 | 2.77E-04 | 0.10 | 0.00 | gnomAD |
| rs7088064    | T  | C  | 72117292 | JHS |  |  |  |  | 0.15 | 0.19  | 0.04 | 2.07E-05 | 0.14 | 0.00 | gnomAD |
| rs61853771   | C  | T  | 72117483 | JHS |  |  |  |  | 0.10 | -0.19 | 0.05 | 2.60E-04 | 0.10 | 0.01 | gnomAD |
| rs111285507  | C  | T  | 72118298 | JHS |  |  |  |  | 0.15 | 0.19  | 0.04 | 2.07E-05 | 0.14 | 0.00 | gnomAD |
| rs189465136  | G  | T  | 72118309 | JHS |  |  |  |  | 0.01 | 0.50  | 0.15 | 5.99E-04 | 0.01 | 0.00 | gnomAD |
| rs181393157  | A  | T  | 72118316 | JHS |  |  |  |  | 0.01 | 0.50  | 0.15 | 5.99E-04 | 0.01 | 0.00 | gnomAD |
| rs7097589    | A  | G  | 72121309 | JHS |  |  |  |  | 0.15 | -0.19 | 0.04 | 1.36E-05 | 0.15 | 0.00 | gnomAD |
| rs77458087   | A  | T  | 72122068 | JHS |  |  |  |  | 0.10 | -0.20 | 0.05 | 1.81E-04 | 0.10 | 0.00 | gnomAD |
| rs11813921   | G  | A  | 72122719 | JHS |  |  |  |  | 0.06 | 0.40  | 0.07 | 1.76E-09 | 0.05 | 0.00 | gnomAD |
| rs112151128  | T  | C  | 72123094 | JHS |  |  |  |  | 0.10 | -0.20 | 0.05 | 1.15E-04 | 0.10 | 0.00 | gnomAD |
| rs59878382   | A  | T  | 72123968 | JHS |  |  |  |  | 0.15 | 0.19  | 0.04 | 2.07E-05 | 0.14 | 0.00 | gnomAD |
| rs74459116   | C  | G  | 72124923 | JHS |  |  |  |  | 0.09 | -0.20 | 0.05 | 2.77E-04 | 0.10 | 0.00 | gnomAD |
| rs1230610876 | A  | AT | 72125247 | JHS |  |  |  |  | 0.10 | -0.19 | 0.05 | 2.07E-04 | N/A  | N/A  | TopMed |
| rs73273275   | C  | T  | 72125360 | JHS |  |  |  |  | 0.09 | -0.20 | 0.05 | 1.73E-04 | 0.09 | 0.00 | gnomAD |
| rs58176560   | C  | A  | 72126680 | JHS |  |  |  |  | 0.09 | -0.20 | 0.05 | 2.77E-04 | 0.10 | 0.00 | gnomAD |
| rs60949556   | C  | T  | 72126935 | JHS |  |  |  |  | 0.09 | -0.20 | 0.05 | 2.77E-04 | 0.10 | 0.00 | gnomAD |
| rs751207     | G  | C  | 72127857 | JHS |  |  |  |  | 0.09 | -0.20 | 0.05 | 2.77E-04 | 0.10 | 0.00 | gnomAD |
| rs7906133    | T  | C  | 72128494 | JHS |  |  |  |  | 0.09 | -0.20 | 0.05 | 2.77E-04 | 0.10 | 0.00 | gnomAD |

|              |       |   |          |     |  |  |  |  |      |       |      |          |      |      |        |
|--------------|-------|---|----------|-----|--|--|--|--|------|-------|------|----------|------|------|--------|
| rs113938820  | C     | G | 72129632 | JHS |  |  |  |  | 0.09 | -0.20 | 0.05 | 2.77E-04 | 0.10 | 0.00 | gnomAD |
| rs80147748   | G     | A | 72133440 | JHS |  |  |  |  | 0.15 | 0.19  | 0.04 | 2.13E-05 | 0.14 | 0.00 | gnomAD |
| rs77293477   | T     | C | 72133497 | JHS |  |  |  |  | 0.15 | 0.19  | 0.04 | 2.07E-05 | 0.14 | 0.00 | gnomAD |
| rs76369836   | G     | A | 72133568 | JHS |  |  |  |  | 0.06 | 0.40  | 0.07 | 1.76E-09 | 0.05 | 0.00 | gnomAD |
| rs112945632  | C     | A | 72133985 | JHS |  |  |  |  | 0.15 | 0.19  | 0.04 | 2.07E-05 | 0.17 | 0.00 | 1000G  |
| rs115943920  | G     | A | 72135194 | JHS |  |  |  |  | 0.07 | -0.28 | 0.06 | 4.13E-06 | 0.08 | 0.00 | gnomAD |
| rs75769543   | A     | T | 72135409 | JHS |  |  |  |  | 0.06 | 0.39  | 0.07 | 3.90E-09 | 0.05 | 0.00 | gnomAD |
| rs115124071  | G     | A | 72137587 | JHS |  |  |  |  | 0.10 | -0.20 | 0.05 | 1.32E-04 | 0.10 | 0.00 | gnomAD |
| rs111638361  | C     | G | 72139403 | JHS |  |  |  |  | 0.15 | 0.19  | 0.04 | 2.17E-05 | 0.14 | 0.00 | gnomAD |
| rs78756870   | C     | T | 72139622 | JHS |  |  |  |  | 0.06 | 0.39  | 0.07 | 5.81E-09 | 0.05 | 0.00 | gnomAD |
| rs57571684   | G     | A | 72141985 | JHS |  |  |  |  | 0.15 | 0.19  | 0.04 | 2.17E-05 | 0.14 | 0.00 | gnomAD |
| rs75700665   | T     | A | 72143237 | JHS |  |  |  |  | 0.06 | 0.39  | 0.07 | 3.90E-09 | 0.05 | 0.00 | gnomAD |
| rs112500992  | C     | T | 72147378 | JHS |  |  |  |  | 0.15 | 0.19  | 0.04 | 2.17E-05 | 0.17 | 0.00 | 1000G  |
| rs111848453  | G     | A | 72150078 | JHS |  |  |  |  | 0.09 | -0.20 | 0.05 | 3.10E-04 | 0.09 | 0.00 | gnomAD |
| rs115613247  | G     | A | 72151311 | JHS |  |  |  |  | 0.07 | -0.27 | 0.06 | 7.64E-06 | 0.08 | 0.00 | gnomAD |
| rs112085011  | G     | A | 72151985 | JHS |  |  |  |  | 0.09 | -0.20 | 0.05 | 2.58E-04 | 0.11 | 0.00 | gnomAD |
| rs1043892251 | TTTTG | T | 72153419 | JHS |  |  |  |  | 0.09 | -0.20 | 0.06 | 3.61E-04 | N/A  | N/A  | TopMed |
| rs77266543   | C     | T | 72154041 | JHS |  |  |  |  | 0.10 | -0.20 | 0.05 | 1.46E-04 | 0.10 | 0.00 | gnomAD |
| rs16929705   | C     | T | 72155685 | JHS |  |  |  |  | 0.13 | -0.21 | 0.05 | 1.06E-05 | 0.12 | 0.00 | gnomAD |
| rs73274912   | A     | G | 72156426 | JHS |  |  |  |  | 0.09 | -0.20 | 0.05 | 3.10E-04 | 0.09 | 0.00 | gnomAD |
| rs78064951   | A     | G | 72156787 | JHS |  |  |  |  | 0.19 | 0.16  | 0.04 | 4.91E-05 | 0.17 | 0.00 | gnomAD |
| rs7070538    | T     | C | 72161437 | JHS |  |  |  |  | 0.21 | 0.13  | 0.04 | 5.85E-04 | 0.19 | 0.00 | gnomAD |
| rs111844577  | C     | T | 72162558 | JHS |  |  |  |  | 0.18 | 0.15  | 0.04 | 1.37E-04 | 0.17 | 0.00 | gnomAD |
| rs12260679   | G     | T | 72164147 | JHS |  |  |  |  | 0.10 | -0.20 | 0.05 | 1.41E-04 | 0.11 | 0.00 | gnomAD |
| rs12245867   | A     | T | 72164148 | JHS |  |  |  |  | 0.10 | -0.20 | 0.05 | 1.41E-04 | 0.11 | 0.00 | gnomAD |
| rs73274928   | T     | C | 72165597 | JHS |  |  |  |  | 0.09 | -0.20 | 0.05 | 2.36E-04 | 0.09 | 0.00 | gnomAD |
| rs115000695  | C     | A | 72166455 | JHS |  |  |  |  | 0.10 | -0.19 | 0.05 | 2.16E-04 | 0.10 | 0.00 | gnomAD |
| rs1404527208 | TA    | T | 72168210 | JHS |  |  |  |  | 0.09 | -0.20 | 0.05 | 2.39E-04 | N/A  | N/A  | TopMed |
| rs116695191  | T     | C | 72168225 | JHS |  |  |  |  | 0.10 | -0.20 | 0.05 | 1.58E-04 | 0.10 | 0.00 | gnomAD |
| rs181830636  | A     | G | 72168422 | JHS |  |  |  |  | 0.06 | 0.39  | 0.07 | 4.83E-09 | 0.05 | 0.00 | gnomAD |
| rs187590269  | C     | A | 72168423 | JHS |  |  |  |  | 0.06 | 0.39  | 0.07 | 4.83E-09 | 0.05 | 0.00 | gnomAD |
| rs190764736  | A     | G | 72170610 | JHS |  |  |  |  | 0.09 | -0.20 | 0.05 | 2.93E-04 | 0.07 | 0.00 | gnomAD |
| rs3998478    | G     | T | 72171250 | JHS |  |  |  |  | 0.09 | -0.20 | 0.05 | 2.39E-04 | 0.09 | 0.00 | gnomAD |
| rs4459211    | T     | A | 72174655 | JHS |  |  |  |  | 0.09 | -0.20 | 0.05 | 2.39E-04 | 0.09 | 0.00 | gnomAD |
| rs77202125   | G     | A | 72174789 | JHS |  |  |  |  | 0.06 | 0.40  | 0.07 | 2.18E-09 | 0.05 | 0.00 | gnomAD |
| rs75498188   | T     | C | 72175180 | JHS |  |  |  |  | 0.05 | 0.38  | 0.07 | 2.24E-08 | 0.05 | 0.00 | gnomAD |
| rs113979286  | A     | G | 72176534 | JHS |  |  |  |  | 0.09 | -0.20 | 0.05 | 2.39E-04 | 0.09 | 0.00 | gnomAD |
| rs73274958   | T     | C | 72178242 | JHS |  |  |  |  | 0.09 | -0.20 | 0.05 | 2.36E-04 | 0.09 | 0.00 | gnomAD |
| rs79367229   | G     | A | 72178855 | JHS |  |  |  |  | 0.18 | 0.15  | 0.04 | 1.48E-04 | 0.16 | 0.00 | gnomAD |
| rs12249760   | C     | T | 72178891 | JHS |  |  |  |  | 0.11 | -0.18 | 0.05 | 3.06E-04 | 0.12 | 0.00 | gnomAD |
| rs112270573  | C     | T | 72180147 | JHS |  |  |  |  | 0.09 | -0.20 | 0.05 | 1.92E-04 | 0.10 | 0.00 | gnomAD |

|              |      |   |          |     |  |  |  |  |      |       |      |          |      |      |        |
|--------------|------|---|----------|-----|--|--|--|--|------|-------|------|----------|------|------|--------|
| rs115908759  | G    | T | 72183204 | JHS |  |  |  |  | 0.06 | 0.39  | 0.07 | 6.13E-09 | 0.05 | 0.00 | gnomAD |
| rs11814345   | C    | T | 72183532 | JHS |  |  |  |  | 0.20 | 0.14  | 0.04 | 4.37E-04 | 0.18 | 0.00 | gnomAD |
| rs73274969   | G    | T | 72183853 | JHS |  |  |  |  | 0.09 | -0.20 | 0.05 | 1.91E-04 | 0.10 | 0.00 | gnomAD |
| rs7088609    | G    | A | 72186851 | JHS |  |  |  |  | 0.20 | 0.14  | 0.04 | 3.94E-04 | 0.19 | 0.00 | gnomAD |
| rs138827662  | C    | T | 72187636 | JHS |  |  |  |  | 0.06 | 0.40  | 0.07 | 2.77E-09 | 0.05 | 0.00 | gnomAD |
| rs115137370  | C    | T | 72190573 | JHS |  |  |  |  | 0.06 | 0.39  | 0.07 | 6.13E-09 | 0.05 | 0.00 | gnomAD |
| rs58811693   | C    | T | 72194588 | JHS |  |  |  |  | 0.20 | 0.14  | 0.04 | 4.20E-04 | 0.19 | 0.00 | gnomAD |
| rs140518251  | G    | A | 72194904 | JHS |  |  |  |  | 0.06 | 0.40  | 0.07 | 2.33E-09 | 0.05 | 0.00 | gnomAD |
| rs140881217  | G    | A | 72195773 | JHS |  |  |  |  | 0.20 | 0.14  | 0.04 | 3.54E-04 | 0.18 | 0.00 | gnomAD |
| rs78851865   | T    | A | 72198725 | JHS |  |  |  |  | 0.20 | 0.14  | 0.04 | 4.20E-04 | 0.18 | 0.00 | gnomAD |
| rs7069184    | T    | C | 72201428 | JHS |  |  |  |  | 0.20 | 0.14  | 0.04 | 4.37E-04 | 0.18 | 0.00 | gnomAD |
| rs75499163   | A    | G | 72202911 | JHS |  |  |  |  | 0.20 | 0.14  | 0.04 | 4.70E-04 | 0.18 | 0.00 | gnomAD |
| rs113697529  | G    | A | 72203152 | JHS |  |  |  |  | 0.20 | 0.14  | 0.04 | 3.77E-04 | 0.18 | 0.00 | gnomAD |
| rs113392869  | T    | C | 72203848 | JHS |  |  |  |  | 0.21 | 0.14  | 0.04 | 3.37E-04 | 0.20 | 0.00 | gnomAD |
| rs111709084  | G    | T | 72205401 | JHS |  |  |  |  | 0.22 | 0.14  | 0.04 | 3.15E-04 | 0.25 | 0.00 | 1000G  |
| rs11818326   | C    | T | 72206184 | JHS |  |  |  |  | 0.22 | 0.14  | 0.04 | 2.51E-04 | 0.21 | 0.00 | gnomAD |
| rs11814530   | A    | G | 72206435 | JHS |  |  |  |  | 0.22 | 0.14  | 0.04 | 3.15E-04 | 0.21 | 0.00 | gnomAD |
| rs7900919    | G    | A | 72206835 | JHS |  |  |  |  | 0.22 | 0.14  | 0.04 | 3.15E-04 | 0.21 | 0.00 | gnomAD |
| rs6480598    | T    | C | 72207055 | JHS |  |  |  |  | 0.20 | 0.14  | 0.04 | 2.76E-04 | 0.18 | 0.00 | gnomAD |
| rs75259911   | G    | A | 72207851 | JHS |  |  |  |  | 0.22 | 0.14  | 0.04 | 3.15E-04 | 0.21 | 0.00 | gnomAD |
| rs113073310  | A    | T | 72208602 | JHS |  |  |  |  | 0.06 | 0.40  | 0.07 | 2.77E-09 | 0.05 | 0.00 | gnomAD |
| rs540696835  | ATG  | A | 72208767 | JHS |  |  |  |  | 0.18 | 0.15  | 0.04 | 2.13E-04 | N/A  | N/A  | gnomAD |
| rs12244630   | A    | G | 72209178 | JHS |  |  |  |  | 0.27 | 0.14  | 0.04 | 1.02E-04 | 0.25 | 0.00 | gnomAD |
| rs7907102    | T    | A | 72209814 | JHS |  |  |  |  | 0.22 | 0.14  | 0.04 | 3.15E-04 | 0.21 | 0.00 | gnomAD |
| rs201420035  | T    | A | 72209814 | JHS |  |  |  |  | 0.22 | 0.14  | 0.04 | 3.15E-04 | N/A  | N/A  | N/A    |
| rs114494815  | G    | A | 72209915 | JHS |  |  |  |  | 0.20 | 0.14  | 0.04 | 2.76E-04 | 0.18 | 0.00 | gnomAD |
| rs7083000    | T    | C | 72209952 | JHS |  |  |  |  | 0.22 | 0.14  | 0.04 | 3.15E-04 | 0.21 | 0.00 | gnomAD |
| rs951045940  | AAGT | A | 72210285 | JHS |  |  |  |  | 0.22 | 0.14  | 0.04 | 3.15E-04 | N/A  | N/A  | N/A    |
| rs1005621404 | G    | T | 72210290 | JHS |  |  |  |  | 0.22 | 0.14  | 0.04 | 3.15E-04 | N/A  | N/A  | N/A    |
| rs73276912   | G    | A | 72210908 | JHS |  |  |  |  | 0.09 | -0.20 | 0.05 | 1.91E-04 | 0.10 | 0.00 | gnomAD |
| rs151140328  | G    | A | 72211769 | JHS |  |  |  |  | 0.22 | 0.14  | 0.04 | 3.15E-04 | 0.21 | 0.00 | gnomAD |
| rs12268049   | C    | T | 72213572 | JHS |  |  |  |  | 0.24 | -0.13 | 0.04 | 4.04E-04 | 0.28 | 0.01 | 1000G  |
| rs73276919   | G    | T | 72216713 | JHS |  |  |  |  | 0.24 | -0.12 | 0.04 | 7.35E-04 | 0.25 | 0.01 | gnomAD |
| rs77301718   | C    | A | 72217807 | JHS |  |  |  |  | 0.20 | 0.15  | 0.04 | 2.06E-04 | 0.18 | 0.00 | gnomAD |
| rs112584813  | C    | A | 72220988 | JHS |  |  |  |  | 0.23 | -0.12 | 0.04 | 7.56E-04 | 0.25 | 0.01 | gnomAD |
| rs10159577   | G    | A | 72221639 | JHS |  |  |  |  | 0.24 | -0.13 | 0.04 | 3.18E-04 | 0.25 | 0.01 | gnomAD |
| rs12246159   | C    | T | 72222245 | JHS |  |  |  |  | 0.25 | -0.13 | 0.04 | 3.60E-04 | 0.26 | 0.01 | gnomAD |
| rs112366504  | G    | A | 72222404 | JHS |  |  |  |  | 0.21 | 0.14  | 0.04 | 2.14E-04 | 0.25 | 0.00 | gnomAD |
| rs7893855    | G    | T | 72222970 | JHS |  |  |  |  | 0.23 | -0.12 | 0.04 | 7.56E-04 | 0.24 | 0.01 | gnomAD |
| rs7893861    | G    | A | 72222992 | JHS |  |  |  |  | 0.25 | -0.13 | 0.04 | 3.60E-04 | 0.25 | 0.01 | gnomAD |
| rs11000226   | C    | G | 72223766 | JHS |  |  |  |  | 0.25 | -0.13 | 0.04 | 2.86E-04 | 0.27 | 0.01 | gnomAD |



|              |    |    |          |     |  |  |  |  |      |       |      |          |      |      |        |
|--------------|----|----|----------|-----|--|--|--|--|------|-------|------|----------|------|------|--------|
| rs12254520   | G  | A  | 72226109 | JHS |  |  |  |  | 0.24 | -0.13 | 0.04 | 3.18E-04 | 0.25 | 0.01 | gnomAD |
| rs55817840   | A  | G  | 72227860 | JHS |  |  |  |  | 0.24 | -0.13 | 0.04 | 2.22E-04 | 0.26 | 0.01 | gnomAD |
| rs7915966    | G  | A  | 72228046 | JHS |  |  |  |  | 0.24 | -0.13 | 0.04 | 2.37E-04 | 0.25 | 0.01 | gnomAD |
| rs7918833    | A  | G  | 72228134 | JHS |  |  |  |  | 0.24 | -0.14 | 0.04 | 1.54E-04 | 0.25 | 0.01 | gnomAD |
| rs7919980    | C  | T  | 72228896 | JHS |  |  |  |  | 0.26 | -0.13 | 0.04 | 2.86E-04 | 0.27 | 0.01 | gnomAD |
| rs12252038   | G  | A  | 72230466 | JHS |  |  |  |  | 0.24 | -0.14 | 0.04 | 1.43E-04 | 0.25 | 0.01 | gnomAD |
| rs11000229   | A  | G  | 72233760 | JHS |  |  |  |  | 0.21 | -0.14 | 0.04 | 2.75E-04 | 0.23 | 0.01 | gnomAD |
| rs4293052    | T  | A  | 72234310 | JHS |  |  |  |  | 0.21 | -0.14 | 0.04 | 2.58E-04 | 0.26 | 0.01 | 1000G  |
| rs143611105  | G  | A  | 72235224 | JHS |  |  |  |  | 0.21 | 0.13  | 0.04 | 8.99E-04 | 0.19 | 0.00 | gnomAD |
| rs12262347   | G  | A  | 72235440 | JHS |  |  |  |  | 0.21 | -0.14 | 0.04 | 2.69E-04 | 0.23 | 0.01 | gnomAD |
| rs144347417  | T  | A  | 72235915 | JHS |  |  |  |  | 0.01 | -0.64 | 0.17 | 2.11E-04 | 0.01 | 0.00 | gnomAD |
| rs1156537239 | C  | CA | 72237561 | JHS |  |  |  |  | 0.21 | -0.13 | 0.04 | 6.49E-04 | N/A  | N/A  | N/A    |
| rs7921206    | C  | T  | 72239526 | JHS |  |  |  |  | 0.21 | -0.14 | 0.04 | 2.32E-04 | 0.23 | 0.01 | gnomAD |
| rs142372764  | G  | A  | 72243278 | JHS |  |  |  |  | 0.21 | 0.14  | 0.04 | 2.97E-04 | 0.19 | 0.00 | gnomAD |
| rs12242675   | C  | A  | 72245576 | JHS |  |  |  |  | 0.22 | -0.15 | 0.04 | 5.24E-05 | 0.24 | 0.01 | gnomAD |
| rs114363068  | C  | T  | 72247665 | JHS |  |  |  |  | 0.20 | 0.13  | 0.04 | 9.86E-04 | 0.19 | 0.00 | gnomAD |
| rs2292366    | C  | A  | 72249075 | JHS |  |  |  |  | 0.23 | -0.13 | 0.04 | 8.09E-04 | 0.24 | 0.01 | gnomAD |
| rs7910711    | G  | T  | 72249360 | JHS |  |  |  |  | 0.23 | -0.13 | 0.04 | 4.93E-04 | 0.25 | 0.01 | gnomAD |
| rs138371565  | C  | T  | 72250493 | JHS |  |  |  |  | 0.06 | 0.36  | 0.06 | 1.96E-08 | 0.05 | 0.00 | gnomAD |
| rs114481297  | T  | C  | 72250750 | JHS |  |  |  |  | 0.06 | 0.37  | 0.06 | 9.05E-09 | 0.05 | 0.00 | gnomAD |
| rs574969966  | AT | A  | 72252022 | JHS |  |  |  |  | 0.06 | 0.35  | 0.06 | 2.65E-08 | N/A  | N/A  | gnomAD |
| rs1055259342 | AT | A  | 72252022 | JHS |  |  |  |  | 0.06 | 0.35  | 0.06 | 2.65E-08 | N/A  | N/A  | N/A    |
| rs111876357  | C  | G  | 72252791 | JHS |  |  |  |  | 0.06 | 0.32  | 0.06 | 2.24E-07 | 0.05 | 0.00 | gnomAD |
| rs146181872  | C  | T  | 72256656 | JHS |  |  |  |  | 0.06 | 0.36  | 0.06 | 1.87E-08 | 0.08 | 0.00 | 1000G  |
| rs4746108    | A  | G  | 72257134 | JHS |  |  |  |  | 0.39 | 0.11  | 0.03 | 4.00E-04 | 0.38 | 0.44 | gnomAD |
| rs75787191   | G  | A  | 72257348 | JHS |  |  |  |  | 0.06 | 0.36  | 0.06 | 1.87E-08 | 0.05 | 0.00 | gnomAD |
| rs141845104  | G  | A  | 72257783 | JHS |  |  |  |  | 0.06 | 0.36  | 0.06 | 1.87E-08 | 0.05 | 0.00 | gnomAD |
| rs149702922  | C  | T  | 72262524 | JHS |  |  |  |  | 0.06 | 0.36  | 0.06 | 2.80E-08 | 0.05 | 0.00 | gnomAD |
| rs116744012  | A  | G  | 72263492 | JHS |  |  |  |  | 0.06 | 0.37  | 0.06 | 1.33E-08 | 0.05 | 0.00 | gnomAD |
| rs75410955   | A  | G  | 72264896 | JHS |  |  |  |  | 0.06 | 0.37  | 0.06 | 1.33E-08 | 0.05 | 0.00 | gnomAD |
| rs78312098   | A  | C  | 72264983 | JHS |  |  |  |  | 0.06 | 0.37  | 0.06 | 1.33E-08 | 0.05 | 0.00 | gnomAD |
| rs145435194  | C  | T  | 72267720 | JHS |  |  |  |  | 0.01 | -0.47 | 0.13 | 3.91E-04 | 0.02 | 0.00 | gnomAD |
| rs75150783   | G  | A  | 72294233 | JHS |  |  |  |  | 0.06 | 0.31  | 0.07 | 3.91E-06 | 0.04 | 0.00 | gnomAD |
| rs111448300  | T  | A  | 72305182 | JHS |  |  |  |  | 0.02 | -0.37 | 0.10 | 4.22E-04 | 0.02 | 0.00 | gnomAD |
| rs76399595   | C  | T  | 72317495 | JHS |  |  |  |  | 0.06 | 0.32  | 0.07 | 2.31E-06 | 0.05 | 0.00 | gnomAD |
| rs11816142   | T  | C  | 72348657 | JHS |  |  |  |  | 0.04 | 0.30  | 0.08 | 1.13E-04 | 0.03 | 0.00 | gnomAD |
| rs115953266  | T  | C  | 72358524 | JHS |  |  |  |  | 0.04 | 0.30  | 0.08 | 1.13E-04 | 0.03 | 0.00 | gnomAD |
| rs116076522  | G  | A  | 72376465 | JHS |  |  |  |  | 0.04 | 0.30  | 0.08 | 1.05E-04 | 0.03 | 0.00 | gnomAD |
| rs9664616    | T  | A  | 72385588 | JHS |  |  |  |  | 0.39 | 0.11  | 0.03 | 9.83E-04 | 0.38 | 0.61 | gnomAD |
| rs10823918   | G  | T  | 72387174 | JHS |  |  |  |  | 0.39 | 0.11  | 0.03 | 9.83E-04 | 0.35 | 0.62 | 1000G  |
| rs12762148   | C  | T  | 72390099 | JHS |  |  |  |  | 0.39 | 0.11  | 0.03 | 9.83E-04 | 0.38 | 0.61 | gnomAD |

|             |   |   |          |     |  |  |  |  |      |       |      |          |      |      |        |
|-------------|---|---|----------|-----|--|--|--|--|------|-------|------|----------|------|------|--------|
| rs79293378  | C | A | 72427635 | JHS |  |  |  |  | 0.04 | 0.30  | 0.08 | 9.70E-05 | 0.03 | 0.00 | gnomAD |
| rs146727001 | G | C | 72441662 | JHS |  |  |  |  | 0.04 | 0.31  | 0.08 | 3.85E-05 | 0.03 | 0.00 | gnomAD |
| rs556625107 | C | T | 72449168 | JHS |  |  |  |  | 0.01 | 0.48  | 0.14 | 8.01E-04 | 0.01 | 0.00 | gnomAD |
| rs11819159  | G | A | 72468902 | JHS |  |  |  |  | 0.04 | 0.29  | 0.08 | 1.47E-04 | 0.03 | 0.00 | gnomAD |
| rs149592197 | G | A | 72496592 | JHS |  |  |  |  | 0.01 | 0.48  | 0.14 | 8.01E-04 | 0.01 | 0.00 | gnomAD |
| rs144440487 | C | T | 72508120 | JHS |  |  |  |  | 0.01 | 0.48  | 0.14 | 8.01E-04 | 0.01 | 0.00 | gnomAD |
| rs193073192 | A | G | 72512607 | JHS |  |  |  |  | 0.01 | -0.45 | 0.13 | 7.01E-04 | 0.02 | 0.00 | gnomAD |
| rs147913979 | C | G | 72560038 | JHS |  |  |  |  | 0.01 | 0.48  | 0.14 | 8.01E-04 | 0.01 | 0.00 | gnomAD |

AF, allele frequency; gnomAD, Genome Aggregation Database (<https://gnomad.broadinstitute.org/>); 1000G, 1000 Genomes Project (<https://www.internationalgenome.org/>); TopMed, NHLBI Trans-Omics for Precision Medicine (<https://www.nhlbiwgs.org/>)

**Table S6.** Summary of orthogonal data supporting aptamer specificity for target proteins

| Protein Name           | UniProt ID | Aptamer ID | Genetic Studies            | Mass Spectrometry | Olink (Rho>0.7) |
|------------------------|------------|------------|----------------------------|-------------------|-----------------|
| Afamin                 | P43652     |            |                            |                   |                 |
| Alkaline phosphatase   | P05186     |            | X <sup>C</sup>             |                   |                 |
| Aminoacylase-1         | Q03154     | 33252      | X <sup>E</sup>             | X <sup>C</sup>    |                 |
| Angiogenin             | P03950     |            |                            |                   |                 |
| Angiostatin            | P00747     | 534969     | X <sup>A, B, C</sup>       |                   |                 |
| Apo E                  | P02649     | 507882     | X <sup>A, B, C</sup>       |                   |                 |
| AREG                   | P15514     |            |                            |                   |                 |
| ARMEL                  | Q49AH0     | 1312219    | X <sup>A, B, C, E</sup>    |                   |                 |
| ASM3A                  | Q92484     | 284313     | X <sup>A, B, C, D, E</sup> | X <sup>C</sup>    |                 |
| b2-Microglobulin       | P61769     | 283454     | X <sup>B, C, E</sup>       |                   | X               |
| bFGF-R                 | P11362     | 45642      | X <sup>A, B, C, D, E</sup> |                   |                 |
| BMP-1                  | P13497     |            | X <sup>C</sup>             |                   |                 |
| b-NGF                  | P01138     | 510457     | X <sup>A, B, C, E</sup>    |                   |                 |
| BNP-32*                | P16860     | 456817     | X <sup>C, E</sup>          |                   |                 |
| BOC                    | Q9BWV1     | 513932     | X <sup>A, B, C</sup>       |                   |                 |
| C1QR1                  | Q9NPY3     |            | X <sup>C</sup>             | X <sup>C</sup>    |                 |
| C34 gp41 HIV Fragment  | Q70626     |            |                            | X <sup>C</sup>    |                 |
| Cadherin-6             | P55285     |            |                            | X <sup>C</sup>    |                 |
| Calcineurin B a        | P63098     | 41516      | X <sup>A, B, C, D, E</sup> | X <sup>C</sup>    |                 |
| CAPG                   | P40121     | 415854     | X <sup>A, B, C, E</sup>    | X <sup>C</sup>    |                 |
| Carbonic anhydrase III | P07451     | 221269     | X <sup>A, C</sup>          |                   |                 |
| Cathepsin A            | P10619     | 412972     | X <sup>A, B, C, D, E</sup> | X <sup>C</sup>    |                 |
| CD23                   | P06734     | 260959     | X <sup>A, C, D</sup>       | X <sup>C</sup>    |                 |
| CD59                   | P13987     | 545933     | X <sup>A, C, D, E</sup>    | X <sup>C</sup>    |                 |
| CgA                    | P10645     |            |                            |                   |                 |
| cGMP-stimulated PDE    | O00408     |            |                            | X <sup>C</sup>    |                 |
| CHKB                   | Q9Y259     | 241855     | X <sup>A, B, C, D, E</sup> | X <sup>C</sup>    |                 |
| c-Jun                  | P05412     | 413172     | X <sup>A, C, D</sup>       | X <sup>C</sup>    |                 |
| Ck-b-8-1*              | P55773     | 48743      | X <sup>A, C, D, E</sup>    | X <sup>C</sup>    |                 |
| CNTFR alpha            | P26992     |            |                            |                   |                 |
| CRDL1                  | Q9BU40     | 25675      | X <sup>A, B, C, D</sup>    | X <sup>C</sup>    |                 |
| Cystatin C             | P01034     |            |                            |                   |                 |
| Cystatin M             | Q15828     |            | X <sup>C</sup>             |                   | X               |

|                        |        |          |                        |                |   |
|------------------------|--------|----------|------------------------|----------------|---|
| CYTD                   | P28325 |          |                        |                |   |
| CYTN                   | P01037 | 1309551  | X <sup>C</sup>         |                |   |
| CYTT                   | P09228 | 477534   | X <sup>A,C,E</sup>     | X <sup>C</sup> |   |
| DAF                    | P08174 | 329130   | X <sup>A,B,C,D,E</sup> | X <sup>C</sup> | X |
| DAN                    | P41271 | 379911   | X <sup>A,B,C</sup>     |                |   |
| DC-SIGNR               | Q9H2X3 | 304961   |                        |                |   |
| DERM                   | Q07507 | 322040   | X <sup>A,B,C,D</sup>   |                | X |
| DKK3                   | Q9UBP4 | 50699    | X <sup>A,B,C,D,E</sup> |                |   |
| DLL1                   | O00548 | 4159130  | X <sup>A,B,C,D,E</sup> | X <sup>C</sup> |   |
| DR6                    | O75509 |          |                        | X <sup>C</sup> |   |
| DSC2                   | Q02487 | 432433   | X <sup>A,C,D</sup>     | X <sup>C</sup> |   |
| EDAR                   | Q9UNE0 | 298535   | X <sup>A,B,C,D</sup>   |                |   |
| EFNB1                  | P98172 |          | X <sup>C,D</sup>       | X <sup>C</sup> |   |
| EFNB2                  | P52799 | 317951   |                        | X <sup>C</sup> |   |
| Elafin                 | P19957 |          | X <sup>C</sup>         | X <sup>C</sup> |   |
| EMAP-2                 | Q12904 | 294858   | X <sup>A,B,C,E</sup>   |                |   |
| Endostatin             | P39060 | 553253   | X <sup>C</sup>         | X <sup>C</sup> |   |
| Eotaxin                | P51671 | 367615   | X <sup>A,B,C,D,E</sup> | X <sup>C</sup> |   |
| EPHB2                  | P29323 | 334849   | X <sup>C</sup>         | X <sup>C</sup> |   |
| EphB6                  | O15197 |          |                        |                |   |
| Ephrin-A4              | P52798 | 11514196 | X <sup>A,B,C</sup>     | X <sup>C</sup> |   |
| Ephrin-A5              | P52803 | 268123   | X <sup>A,B,C</sup>     |                | X |
| Epithelial cell kinase | P29317 |          |                        |                |   |
| ERBB3                  | P21860 |          | X <sup>B,C,D</sup>     |                |   |
| ESAM                   | Q96AP7 |          | X <sup>B,C,D</sup>     |                |   |
| Factor B               | P00751 | 415457   | X <sup>A,B,C,D,E</sup> |                |   |
| Factor D               | P00746 | 765511   | X <sup>A,B,C,D</sup>   |                |   |
| Factor H               | P08603 | 765511   | X <sup>A,B,C,D</sup>   |                |   |
| Factor I               | P05156 | 846941   | X <sup>C</sup>         | X <sup>C</sup> | X |
| FBLN3                  | Q12805 |          |                        |                |   |
| FGF23                  | Q9GZV9 | 498254   | X <sup>A,B,C,D,E</sup> | X <sup>C</sup> |   |
| FLRT2                  | O43155 | 315257   | X <sup>A,B,C,E</sup>   |                |   |
| FN1.4                  | P02751 |          |                        |                |   |
| Fractalkine/CX3CL-1    | P78423 |          |                        |                |   |
| FSTL3                  | O95633 | 31984    |                        |                |   |
| GAS1                   | P54826 |          | X <sup>C</sup>         | X <sup>C</sup> |   |
| GDNF                   | P39905 | 268521   | X <sup>C,E</sup>       | X <sup>C</sup> |   |
| Gelsolin               | P06396 | 27116    | X <sup>A,B,C</sup>     | X <sup>C</sup> |   |
| GFRa-1                 | P56159 | 380310   | X <sup>A,C,D,E</sup>   |                |   |

|                              |        |         |                            |                   |   |
|------------------------------|--------|---------|----------------------------|-------------------|---|
| Glutathione S-transferase Pi | P09211 |         | X <sup>C</sup>             | X <sup>C</sup>    |   |
| Gro-a                        | P09341 | 507728  | X <sup>A, B, C, D</sup>    | X <sup>C</sup>    |   |
| Growth hormone receptor      | P10912 |         |                            |                   |   |
| HCC-1                        | Q16627 | 364014  | X <sup>E</sup>             |                   |   |
| HGF                          | P14210 | 334053  | X <sup>A, C</sup>          | X <sup>C</sup>    |   |
| IDS                          | P22304 | 316970  | X <sup>A, B, C, E</sup>    |                   | X |
| IDUA                         | P35475 | 365150  | X <sup>A, B, C, D, E</sup> |                   |   |
| IGFBP-2                      | P18065 |         | X <sup>C</sup>             |                   |   |
| IGFBP-5                      | P24593 | 220117  | X <sup>A, B, C, E</sup>    | X <sup>C</sup>    |   |
| IGFBP-6                      | P24592 |         |                            |                   |   |
| IGF-II receptor              | P11717 | 496850  | X <sup>A, C, E</sup>       |                   |   |
| IL-10                        | P22301 | 511273  | X <sup>C</sup>             |                   |   |
| IL-17F                       | Q96PD4 |         | X <sup>C</sup>             |                   |   |
| IL-18 BPa                    | O95998 | 476331  | X <sup>A, C, D, E</sup>    | X <sup>C</sup>    |   |
| IL-19                        | Q9UHD0 |         |                            |                   |   |
| IL-5                         | P05113 |         |                            |                   |   |
| IL-6                         | P05231 |         | X <sup>C</sup>             |                   |   |
| JAM-B                        | P57087 |         |                            |                   |   |
| kallikrein 8                 | O60259 | 1413137 |                            |                   |   |
| Layilin                      | Q6UX15 | 261560  | X <sup>A</sup>             | X <sup>C</sup>    |   |
| LG3BP                        | Q08380 |         | X <sup>C</sup>             |                   |   |
| LGMN                         | Q99538 |         |                            |                   |   |
| Lipocalin 2                  | P80188 | 302836  | X <sup>A, B, C, D, E</sup> |                   | X |
| LSAMP                        | Q13449 | 302837  | X <sup>A, B, C, D, E</sup> |                   | X |
| Lysozyme                     | P61626 | 331474  | X <sup>A, B, C</sup>       |                   | X |
| MATN2                        | O00339 |         |                            |                   |   |
| MCP-1                        | P13500 | 511084  |                            |                   |   |
| MIA                          | Q16674 | 492010  | X <sup>A, B, C, D, E</sup> | X <sup>C</sup>    |   |
| MIP-1a                       | P10147 |         | X <sup>C</sup>             | X <sup>C</sup>    |   |
| MIP-5                        | Q16663 | 365774  | X <sup>D</sup>             | X <sup>C</sup>    |   |
| MP2K2                        | P36507 | 282723  | X <sup>A, B, C, E</sup>    | X <sup>C</sup>    |   |
| MPIF-1*                      | P55773 |         |                            |                   |   |
| Myoglobin                    | P02144 |         |                            |                   |   |
| NEGR1                        | Q7Z3B1 | 84746   | X <sup>A, B, C, E</sup>    |                   |   |
| NET4                         | Q9HB63 | 1312652 | X <sup>A, B, C, E</sup>    |                   |   |
| NKp46                        | O76036 | 33431   | X <sup>A, E</sup>          | X <sup>C, F</sup> |   |
| NRX1B                        | P58400 | 30093   |                            |                   |   |
| NRX3B                        | Q9HDB5 | 497934  | X <sup>A, B, C, D, E</sup> |                   |   |
| N-terminal pro-BNP*          | P16860 |         |                            | X <sup>C</sup>    |   |

|                                   |        |          |                            |                |   |
|-----------------------------------|--------|----------|----------------------------|----------------|---|
| OBCAM                             | Q14982 | 500052   | X <sup>A,C</sup>           |                |   |
| OPG                               | O00300 | 848029   | X <sup>A, C, E</sup>       |                |   |
| OX2G                              | P41217 |          |                            |                |   |
| PAPP-A                            | Q13219 |          | X <sup>C</sup>             |                |   |
| PDE11                             | Q9HCR9 | 29996    | X <sup>A,B,C</sup>         |                |   |
| PD-L2                             | Q9BQ51 | 512912   | X <sup>A, C, D, E</sup>    |                |   |
| Periostin                         | Q15063 |          |                            |                |   |
| Peroxiredoxin-5                   | P30044 | 345757   | X <sup>C</sup>             |                |   |
| PIANP                             | Q8IYJ0 | 330323   | X <sup>A, C</sup>          | X <sup>C</sup> | X |
| PLXC1                             | O60486 |          | X <sup>C, D, E</sup>       | X <sup>C</sup> |   |
| P-Selectin                        | P16109 |          | X <sup>B, C, D, E</sup>    |                |   |
| PSP                               | P05451 | 26872    | X <sup>A,B,C,D</sup>       | X <sup>C</sup> |   |
| RAP                               | P30533 | 496252   | X <sup>A,B,C,E</sup>       |                |   |
| REG4                              | Q9BYZ8 | 33318    | X <sup>A,B</sup>           |                |   |
| RELT                              | Q969Z4 | 263561   | X <sup>A</sup>             |                |   |
| resistin                          | Q9HD89 | 514056   | X <sup>C</sup>             |                |   |
| RET                               | P07949 |          |                            |                |   |
| RGMB                              | Q6NW40 | 1310982  | X <sup>A,C</sup>           |                |   |
| ROR1                              | Q01973 |          | X <sup>B, C</sup>          |                |   |
| Siglec-7                          | Q9Y286 | 513452   | X <sup>A,B,C,D, E</sup>    |                |   |
| SLIK5                             | O94991 | 323550   | X <sup>A,B,C,D, E</sup>    | X <sup>C</sup> | X |
| SMOC1                             | Q9H4F8 | 477110   | X <sup>A,B,C,D, E</sup>    |                |   |
| Soggy-1                           | Q9UK85 | 549112   | X <sup>A,B,C,D, E</sup>    |                |   |
| SPINT2                            | O43291 | 511531   | X <sup>A,B,C,D</sup>       |                | X |
| SREC-I                            | Q14162 | 29819    | X <sup>A,B,C,D</sup>       | X <sup>C</sup> |   |
| Survivin                          | O15392 |          |                            |                |   |
| TAJ                               | Q9NS68 | 362233   | X <sup>A, C, E</sup>       |                |   |
| Testican-2                        | Q92563 | 300467   | X <sup>A, B, C, D, E</sup> |                |   |
| TFF3                              | Q07654 | 336261   | X <sup>E</sup>             | X <sup>C</sup> |   |
| TGF-b R III                       | Q03167 | 43282    | X <sup>A, C, E</sup>       |                |   |
| TIMD3                             | Q8TDQ0 |          | X <sup>B, C</sup>          |                |   |
| TNF sR-I                          | P19438 |          |                            |                |   |
| TNF sR-II                         | P20333 |          |                            |                |   |
| tPA                               | P00750 | 131185   | X <sup>A, B, C</sup>       |                |   |
| TRAIL R1                          | O00220 | 332727   | X <sup>A,B,C,E</sup>       |                |   |
| Troponin I, skeletal, fast twitch | P48788 |          |                            |                |   |
| Troponin T                        | P45379 | 304631   | X <sup>A, B, C</sup>       |                |   |
| Trypsin                           | P07477 | 511115   | X <sup>A, C</sup>          |                |   |
| TSP4                              | P35443 | 14136234 |                            |                |   |

|          |        |        |                            |                |   |
|----------|--------|--------|----------------------------|----------------|---|
| UNC5H3   | O95185 | 513115 | X <sup>A, C</sup>          |                |   |
| UNC5H4   | Q6UXZ4 | 360771 | X <sup>A, B, C, D</sup>    | X <sup>C</sup> | X |
| uPA      | P00749 |        |                            |                |   |
| VEGF sR2 | P35968 | 36445  |                            |                |   |
| VEGF*    | P15692 | 29777  | X <sup>A, B, C, D, E</sup> |                |   |
| VEGF121* | P15692 |        | X <sup>C</sup>             |                |   |
| WFKN2    | Q8TEU8 | 274268 | X <sup>A, B, C</sup>       |                |   |

Listed above are the proteins significantly associated with baseline eGFR and eGFR decline (in alphabetical order). Aptamer specificity for target proteins were confirmed/inferred via at least one orthogonal method (i.e. genetics, mass spectrometry, immunoassay). Genetic studies with cis-pQTL in literature and unpublished data cited. The Olink Spearman Rho data was generated from 40 samples run on both SOMAscan Version 1.1 and Olink (12 panels, unpublished data). Mass spectrometry data from previously published literature. \*Genetic studies unable to determine aptamer protein isoform specificity.

A= FHS-MDCS GWAS meta-analysis (unpublished data)

B= (8)

C= (9)

D= (10)

E=FHS-MDC exome array meta-analysis (unpublished data)

F= (11)

## SI References

1. L. M. Raffield *et al.*, Hemostasis, D-Dimer in African Americans: Whole Genome Sequence Analysis and Relationship to Cardiovascular Disease Risk in the Jackson Heart Study. *Arterioscler. Thromb. Vasc. Biol.* **37**, 2220-2227 (2017).
2. W. Zhou *et al.*, Efficiently controlling for case-control imbalance and sample relatedness in large-scale genetic association studies. *Nat. Genet.* **50**, 1335-1341 (2018).
3. J. B. Wilk *et al.*, A genome-wide association study of pulmonary function measures in the Framingham Heart Study. *PLoS Genet.* **5**, e1000429 (2009).
4. Y. Li, C. J. Willer, J. Ding, P. Scheet, G. R. Abecasis, MaCH: using sequence and genotype data to estimate haplotypes and unobserved genotypes. *Genet. Epidemiol.* **34**, 816-834 (2010).
5. A. L. Price *et al.*, Principal components analysis corrects for stratification in genome-wide association studies. *Nat. Genet.* **38**, 904-909 (2006).
6. M. H. Chen, Q. Yang, GWAF: an R package for genome-wide association analyses with family data. *Bioinformatics* **26**, 580-581 (2010).
7. K. J. Karczewski *et al.*, Variation across 141,456 human exomes and genomes reveals the spectrum of loss-of-function intolerance across human protein-coding genes. *bioRxiv*, (2019).
8. B. B. Sun *et al.*, Genomic atlas of the human plasma proteome. *Nature* **558**, 73-79 (2018).
9. V. Emilsson *et al.*, Co-regulatory networks of human serum proteins link genetics to disease. *Science* **361**, 769-773 (2018).
10. K. Suhre *et al.*, Connecting genetic risk to disease end points through the human blood plasma proteome. *Nat. Commun.* **8**, 14357 (2017).
11. D. Ngo *et al.*, Aptamer-Based Proteomic Profiling Reveals Novel Candidate Biomarkers and Pathways in Cardiovascular Disease. *Circulation* **134**, 270-285 (2016).
